# Supplementary material for: First Glimpse into the Genomic Characterization of People from the Imperial Roman Community of Casal Bertone (Rome, First–Third Centuries AD)
Source: MDPI journal article supplement (doi:10.3390/genes13010136), 2022-01-13
Supplement: s1 [file s1]

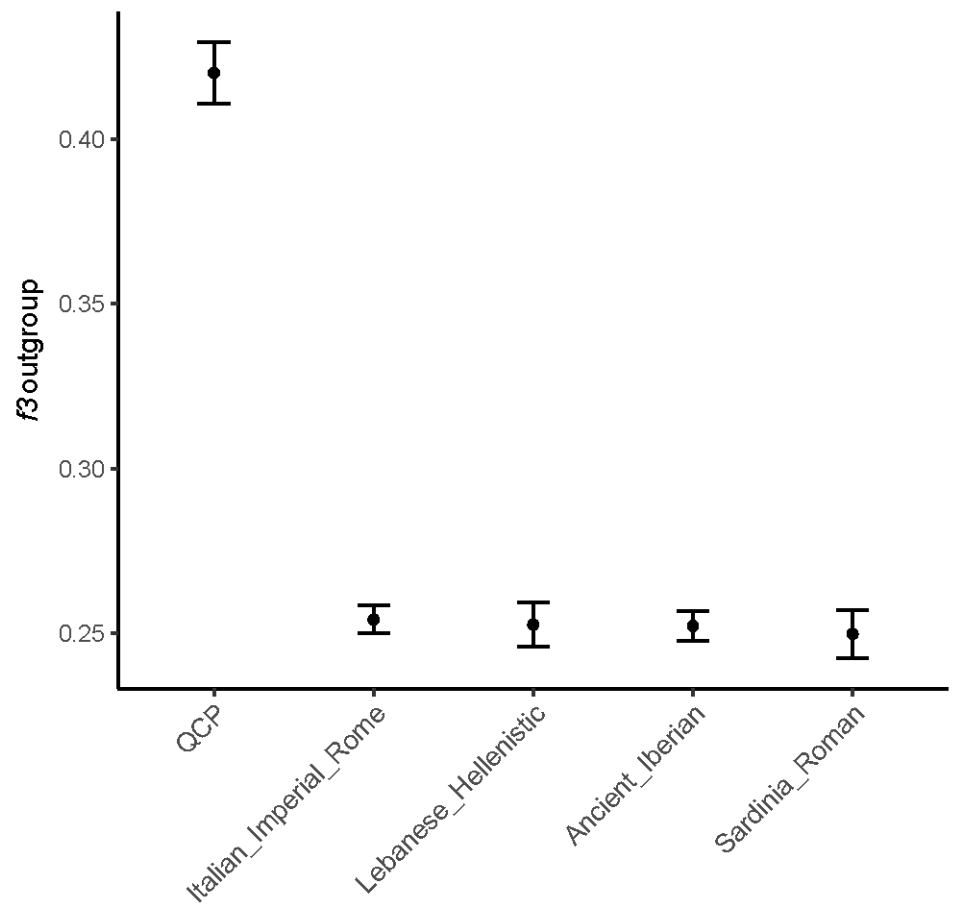

**Supplementary Figure S1:** Visual representation of f3-outgroup statistics for CB and ancient populations in the form of f3-outgroups (Papuan; CB, Populations).

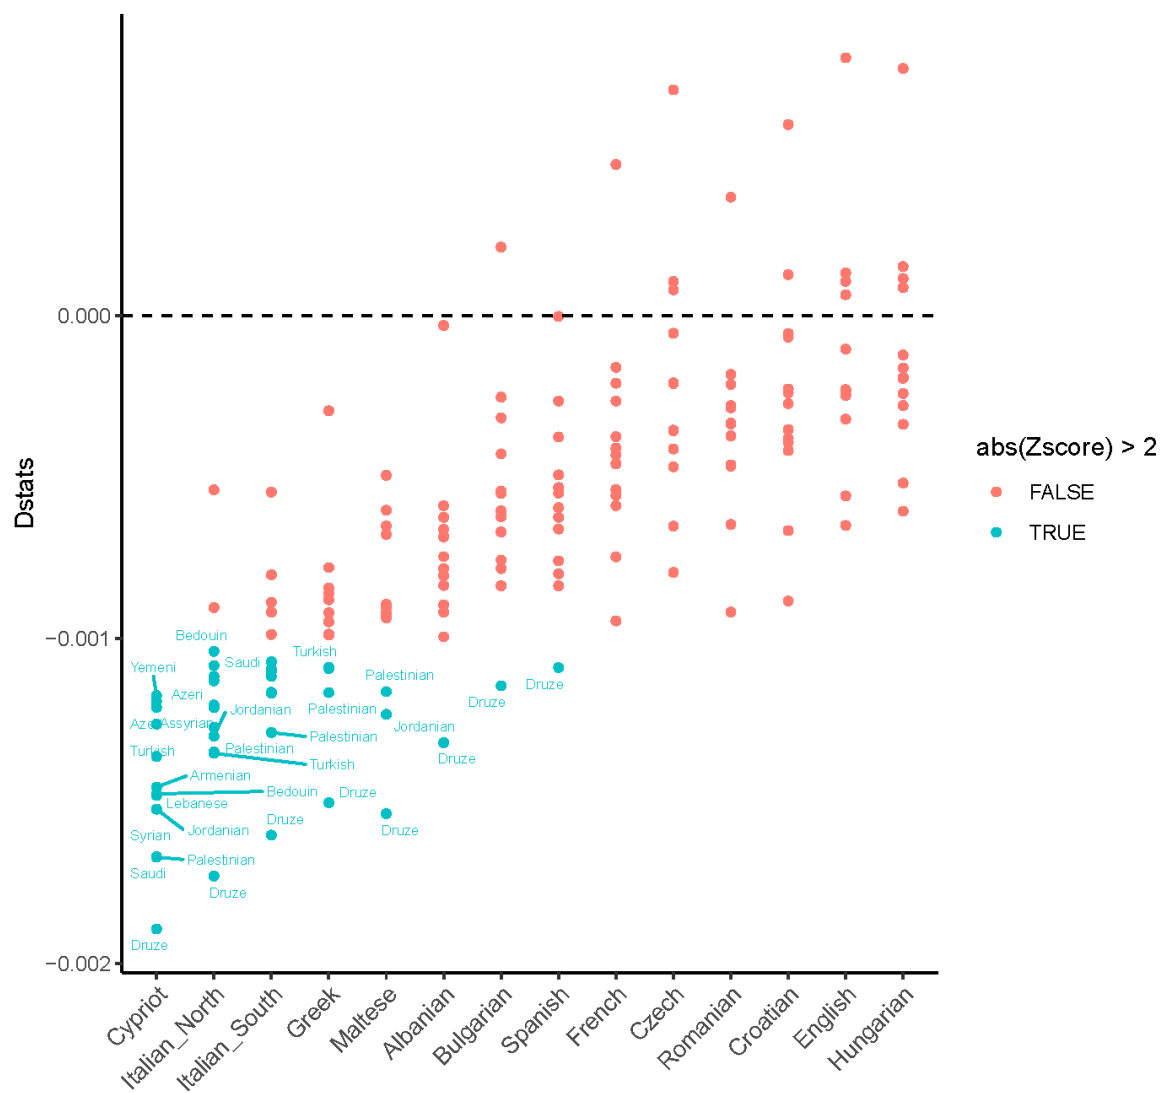

**Supplementary Figure S2:** Visual summary of D-statistics of the form D (Papuan, CB; Asians, Europeans). Dstats < 0: CB is more similar to the Asian population in the label, Dstats > 0: CB is more similar to the European population in the X-axis. The significance of the analysis is expressed by abs(Zscore). Labels are reported only for the significant analysis.

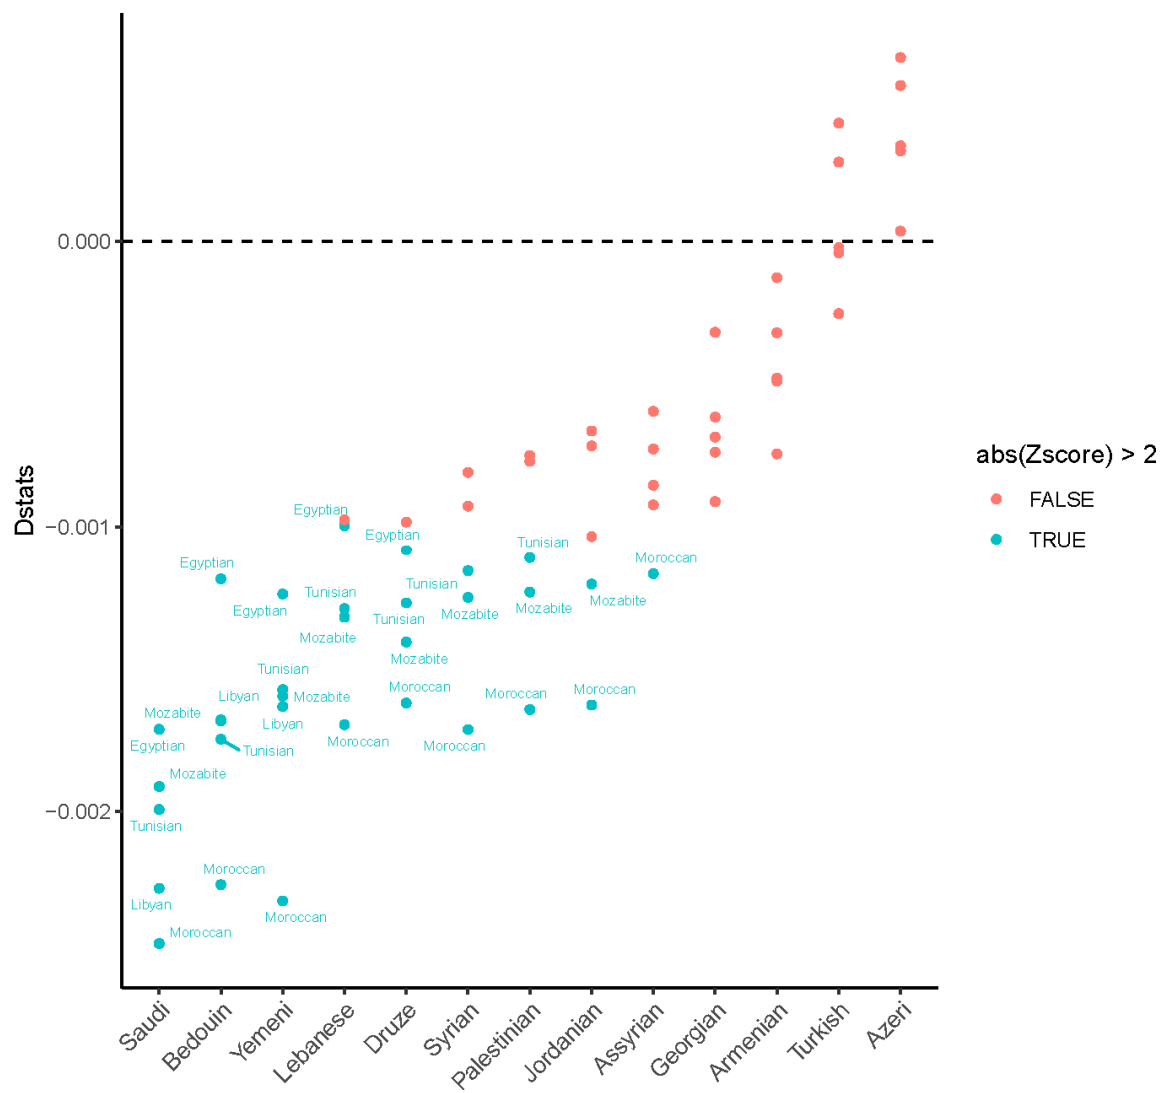

**Supplementary Figure S3:** Visual summary of D-statistics of the form D (Papuan, CB; North Africans, Asians). Dstats < 0: CB is more similar to the North African population in the label, Dstats > 0: CB is more similar to the Asian population in the X-axis. The significance of the analysis is expressed by abs (Zscore). Labels are reported only for significant analyses.

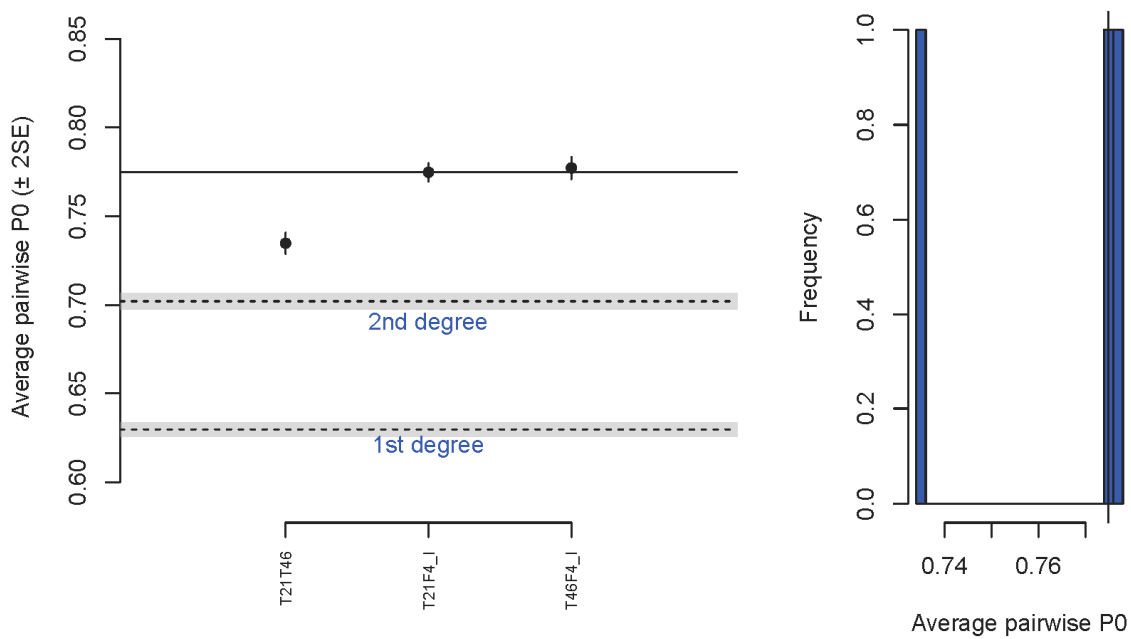

**Supplementary Figure S4:** Visual kinship reconstruction for the pairs reported in the X-axis.

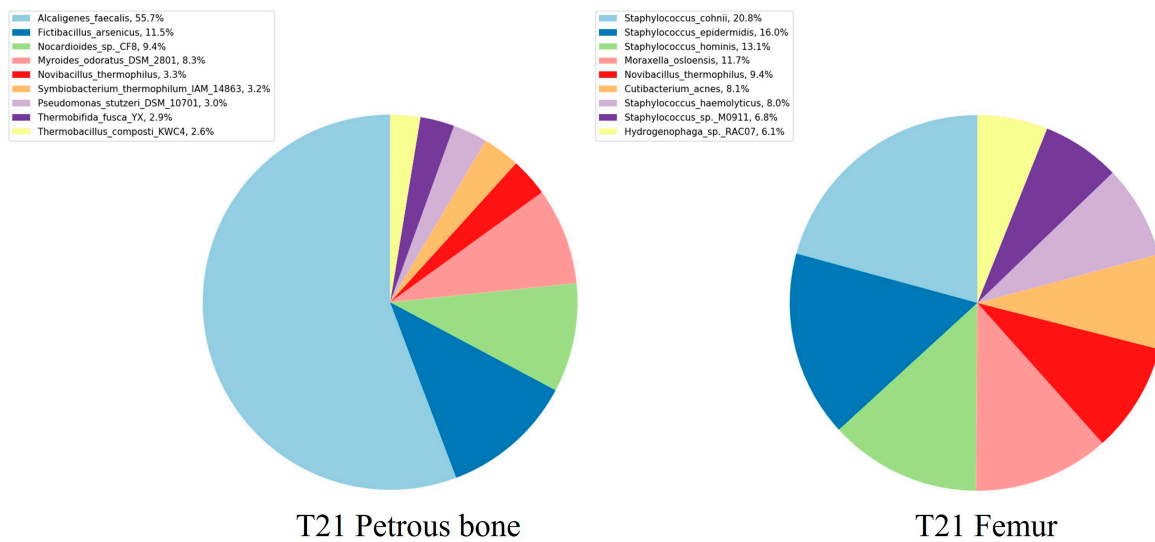

**Supplementary Figure S5:** Visual representation of the bacterial findings associated with T21.

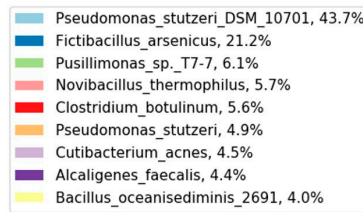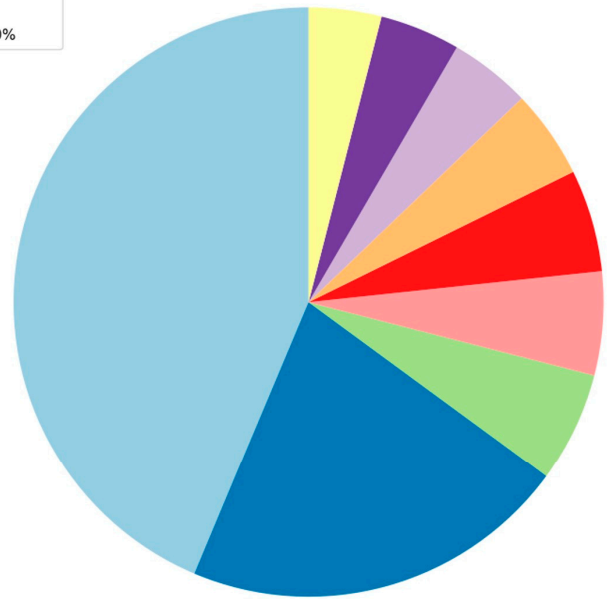

T46 Petrous bone

**Supplementary Figure S6:** Visual representation of the bacterial findings associated with T46.

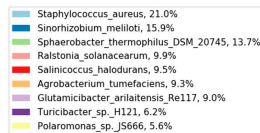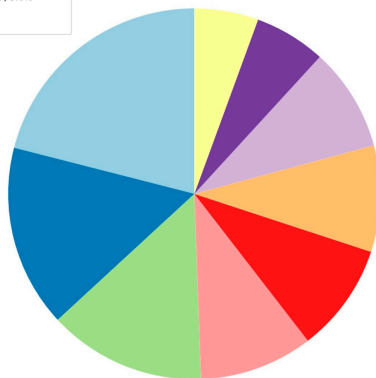

F4\_I Petrous bone

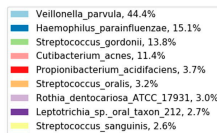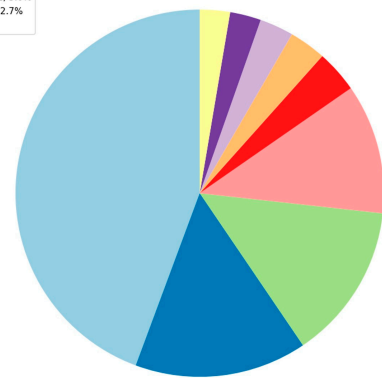

F4\_I Femur

**Supplementary Figure S7:** Visual representation of the bacterial findings associated with F4\_I.
