# Supplementary material for: First Glimpse into the Genomic Characterization of People from the Imperial Roman Community of Casal Bertone (Rome, First–Third Centuries AD)
Source: Genes (Basel). 2022 Jan 13;13(1):136. doi: 10.3390/genes13010136 (PMC8774527; doi:10.3390/genes13010136)
Supplement: Supplementary file 1 [file genes-13-00136-s001.zip]

Archive with 7 entries (7 files):
- Supplementary Figures S1-S7.pdf
- Supplementary Table S1.xlsx
- Supplementary Table S2.xlsx
- Supplementary Table S3.xlsx
- Supplementary Table S4.xlsx
- Supplementary Table S5.xlsx
- Supplementary Table S6.xlsx
