# Supplementary material for: First Glimpse into the Genomic Characterization of People from the Imperial Roman Community of Casal Bertone (Rome, First–Third Centuries AD)
Source: Genes (Basel). 2022 Jan 13;13(1):136. doi: 10.3390/genes13010136 (PMC8774527; doi:10.3390/genes13010136)
Supplement: Supplementary file 1 [file genes-13-00136-s001.zip › Supplementary Table S1.xlsx]

## Sheet: Foglio1
Supplementary Table S1: Reference populations used for the comparisons. * indicates ancient samples.
Populations	n	Reference
Albania	6	Lazaridis et al., 2014
Algeria	28	Patterson et al. 2012; Lazaridis et al. 2014
Armenia	18	Jeong, 2019; Lazaridis et al. 2014
Azerbaijan	9	Jeong, 2019
Bulgaria	10	Lazaridis et al. 2014
Croatia	10	Lazaridis et al. 2014
Cyprus	8	Lazaridis et al. 2014
Czech Republic	10	Lazaridis et al. 2014
Egypt	18	Lazaridis et al. 2014
France	30	Patterson et al. 2012; Lazaridis et al. 2014; Lazaridis et al. 2016
Georgia	16	Jeong et al. 2019; Lazaridis et al. 2014
Great Britain	20	1KGPhase3; Lazaridis et al. 2014
Greece	20	Lazaridis et al. 2014
Hungary	20	Lazaridis et al. 2014
Iraq	3	Lazaridis et al. 2014
Israel	45	Patterson et al. 2012
Italy	60	Patterson et al. 2012; Lazaridis et al. 2014; Lazaridis et al. 2016; 1KGPhase3
Jordan	9	Lazaridis et al. 2014
Lebanon	28	Lazaridis et al. 2014; Lazaridis et al. 2016
Libya	5	Lazaridis et al. 2016
Malta	8	Lazaridis et al. 2014
Morocco	16	Lazaridis et al. 2014; Lazaridis et al. 2016
Romania	10	Lazaridis et al. 2016
Saudi Arabia	8	Lazaridis et al. 2014
Spain	40	Lazaridis et al. 2014; 1KGPhase3
Syria	8	Lazaridis et al. 2014
Tunisia	8	Lazaridis et al. 2014
Turkey	45	Lazaridis et al. 2014
Yemen	19	Vyas et al. 2017
Roman_Iberian*	33	Olalde et al. 2019
Roman_Britain*	9	Martiniano et al. 2016; Schiffels et al. 2016
Italy_Imperial_Rome*	57	Antonio et al. 2019; Marcus et al. 2020; De Angelis et al. 2021
Lebanon_Imperial_Rome*	7	Haber et al. 2018; 2020
Israel_MLBA*	3	Agranat-Tamir et al. 2020
Israel_IA*	2	Agranat-Tamir et al. 2020
Jordan_LBA_IA*	1	Agranat-Tamir et al. 2020
Italy_Sardinia_IA_2*	1	Fernandes et al. 2020
Lebanon_Hellenistic*	3	Haber et al. 2020
Lebanon_IA_3*	10	Haber et al. 2020
Lebanon_IA_2*	2	Haber et al. 2020
Greece_BA_Mycenaean*	3	Lazaridis et al. 2017
Greece_BA_Mycenaean_Pylos*	1	Lazaridis et al. 2017
Greece_Crete_Armenoi*	1	Lazaridis et al. 2017
Italy_Sardinia_Punic_2*	4	Marcus et al. 2020
Italy_Sardinia_Punic_1*	5	Marcus et al. 2020
Canary_Island_Guanche*	5	Rodriguez-Varela et al. 2017
Ibiza_Punic*	1	Zalloua et al. 2018
References Supplementary Table 1
Agranat-Tamir L, Waldman S, Martin MAS, Gokhman D, Mishol N, Eshel T, Cheronet O, Rohland N, Mallick S, Adamski N, Lawson AM, Mah M, Michel M, Oppenheimer J, Stewardson K, Candilio F, Keating D, Gamarra B, Tzur S, Novak M, Kalisher R, Bechar S, Eshed V, Kennett DJ, Faerman M, Yahalom-Mack N, Monge JM, Govrin Y, Erel Y, Yakir B, Pinhasi R, Carmi S, Finkelstein I, Carmel L, Reich D. The Genomic His…
Antonio ML, Gao Z, Moots HM, Lucci M, Candilio F, Sawyer S, Oberreiter V, Calderon D, Devitofranceschi K, Aikens RC, et al. 2019. Ancient Rome: a genetic crossroads of Europe and the Mediterranean. Science. 366(6466):708-714. https://doi: 10.1126/science.aay6826
De Angelis F, Veltre V, Romboni M, Di Corcia T, Scano G, Martínez-Labarga C, Catalano P, Rickards O. (2021) Ancient genomes from a rural site in Imperial Rome (1st–3rd cent. CE): a genetic junction in the Roman Empire, Annals of Human Biology, 48:3, 234-246, DOI: 10.1080/03014460.2021.1944313
Fernandes DM, Mittnik A, Olalde I, Lazaridis I, Cheronet O, Rohland N, Mallick S, Bernardos R, Broomandkhoshbacht N, Carlsson J et al.. The spread of steppe and Iranian-related ancestry in the islands of the western Mediterranean. 2020. Nat Ecol Evol 4(3):334-345. https://doi: 10.1038/s41559-020-1102-0
Haber M, Doumet-Serhal C, Scheib CL, Xue Y, Mikulski R, Martiniano R, Fischer-Genz B, Schutkowski H, Kivisild T, Tyler-Smith C. 2018. A transient pulse of genetic admixture from the crusaders in the near east identified from ancient genome sequences. Am J Hum Genet. 104(5):977-984
Haber M, Nassar J, Almarri MA, Saupe T, Saag L, Griffith SJ, Doumet-Serhal C, Chanteau J, Saghieh-Beydoun M, Xue Y, Scheib CL, Tyler-Smith C. A Genetic History of the Near East from an aDNA Time Course Sampling Eight Points in the Past 4,000 Years. 2020. Am J Hum Genet 107(1):149-157. https://doi: 10.1016/j.ajhg.2020.05.008.
Jeong C, Balanovsky O, Lukianova E, Kahbatkyzy N, Flegontov P, Zaporozhchenko V, Immel A, Wang CC, Ixan O, Khussainova E, et al. 2019. The genetic history of admixture across inner Eurasia. Nat Ecol Evol. 3(6):966-976. https://doi: 10.1038/s41559-019-0878-2
Lazaridis I, Patterson N, Mittnik A, Renaud G, Mallick S, Kirsanow K, Sudmant PH, Schraiber JG, Castellano S, Lipson M, et al. 2014. Ancient human genomes suggest three ancestral populations for present-day Europeans. Nature. 513(7518):409-413. https://doi: 10.1038/nature13673
Lazaridis I, Nadel D, Rollefson G, Merrett DC, Rohland N, Mallick S, Fernandes D, Novak M, Gamarra B, Sirak K, et al. 2016. Genomic insights into the origin of farming in the ancient Near East. Nature. 536(7617):419-24. https://doi: 10.1038/nature19310. Epub 2016 Jul 25
Lazaridis I, Mittnik A, Patterson N, Mallick S, Rohland N, Pfrengle S, Furtwängler A, Peltzer A, Posth C, Vasilakis A, McGeorge PJP, Konsolaki-Yannopoulou E, Korres G, Martlew H, Michalodimitrakis M, Özsait M, Özsait N, Papathanasiou A, Richards M, Roodenberg SA, Tzedakis Y, Arnott R, Fernandes DM, Hughey JR, Lotakis DM, Navas PA, Maniatis Y, Stamatoyannopoulos JA, Stewardson K, Stockhammer P, Pi…
Marcus JH, Posth C, Ringbauer H, Lai L, Skeates R, Sidore C, Beckett J, Furtwängler A, Olivieri A, Chiang CWK, Al-Asadi H, Dey K, Joseph TA, Liu CC, Der Sarkissian C, Radzevičiūtė R, Michel M, Gradoli MG, Marongiu P, Rubino S, Mazzarello V, Rovina D, La Fragola A, Serra RM, Bandiera P, Bianucci R, Pompianu E, Murgia C, Guirguis M, Orquin RP, Tuross N, van Dommelen P, Haak W, Reich D, Schlessinger…
Martiniano R, Caffell A, Holst M, Hunter-Mann K, Montgomery J, Müldner G, McLaughlin RL, Teasdale MD, van Rheenen W, Veldink JH, et al. 2016. Genomic signals of migration and continuity in Britain before the Anglo-Saxons. Nat Commun. 7:10326. https://doi: 10.1038/ncomms10326
Olalde I, Mallick S, Patterson N, Rohland N, Villalba-Mouco V, Silva M, Dulias K, Edwards CJ, Gandini F, Pala M, et al. 2019. The genomic history of the Iberian Peninsula over the past 8000 years. Science. 363(6432):1230-1234. https://doi: 10.1126/science.aav4040
Patterson N, Moorjani P, Luo Y, Mallick S, Rohland N, Zhan Y, Genschoreck T, Webster T, Reich D. 2012. Ancient admixture in human history. Genetics. 192(3):1065-93. https://doi: 10.1534/genetics.112.145037
Rodríguez-Varela R, Günther T, Krzewińska M, Storå J, Gillingwater TH, MacCallum M, Arsuaga JL, Dobney K, Valdiosera C, Jakobsson M, Götherström A, Girdland-Flink L. Genomic Analyses of Pre-European Conquest Human Remains from the Canary Islands Reveal Close Affinity to Modern North Africans. 2017. CurrBiol 27(21):3396-3402. https://doi: 10.1016/j.cub.2017.09.059.
Schiffels S, Haak W, Paajanen P, Llamas B, Popescu E, Loe L, Clarke R, Lyons A, Mortimer R, Sayer D, et al. 2016. Iron age and Anglo-Saxon genomes from East England reveal British migration history. Nat Commun.7:10408. https://doi: 10.1038/ncomms10408
Vyas DN, Al-Meeri A, Mulligan CJ. 2017. Testing support for the northern and southern dispersal routes out of Africa: an analysis of Levantine and southern Arabian populations. Am J Phys Anthropol. 164(4):736-749. https://doi: 10.1002/ajpa.23312.
Zalloua P, Collins CJ, Gosling A, Biagini SA, Costa B, Kardailsky O, Nigro L, Khalil W, Calafell F, Matisoo-Smith E. Sci Rep. 2018. Ancient DNA of Phoenician remains indicates discontinuity in the settlement history of Ibiza. 8(1):17567. https://doi: 10.1038/s41598-018-35667-y.
1000 Genomes Project Consortium, Auton A, Brooks LD, Durbin RM, Garrison EP, Kang HM, Korbel JO, Marchini JL, McCarthy S, McVean GA, Abecasis GR. 2015. A global reference for human genetic variation. Nature. 526(7571):68-74. https://doi: 10.1038/nature15393.
