# Supplementary material for: First Glimpse into the Genomic Characterization of People from the Imperial Roman Community of Casal Bertone (Rome, First–Third Centuries AD)
Source: Genes (Basel). 2022 Jan 13;13(1):136. doi: 10.3390/genes13010136 (PMC8774527; doi:10.3390/genes13010136)
Supplement: Supplementary file 1 [file genes-13-00136-s001.zip › Supplementary Table S2.xlsx]

## Sheet: coverage
Supplementary Table S2: Coverage
Sample Name	Number of reads	Coverage (Mean)	Coverage (SD)
T21	2342021	0.0562	0.2982
F4_I	2029640	0.0458	0.2662
T46	1267711	0.0311	0.2228
F9	24924	0.0006	0.0297
T9	14623	0.0003	0.0214

## Sheet: contamination estimates
Supplementary Table 2: Contamination estimates for samples >50,000 reads
Sample Name	Contamination Estimate Method	Contamination Point Estimate	LB 95% CI	UB 95% CI	Error rate (epsilon)	Overlapping sites between reference panel and sequencing data, after filtering
T21	One-cns Two-cns	6.47509586143642E-09 6.47509586143642E-09	6.47509586143642E-09 6.47509586143642E-09	6.47509586143642E-09 6.47509586143642E-09	0 0	14 14
T46	One-cns Two-cns	6.47509586143642E-09 6.47509586143642E-09	6.47509586143642E-09 6.47509586143642E-09	6.47509586143642E-09 6.47509586143642E-09	0 0	1 1
F4_I	One-cns Two-cns	0.119097766261941 0.125199305623688	- 0.0728268770639556 - 0.0856142697087076	0.311022409587838 0.336012880956084	0.0208333333333333 0.0208333333333333	11 11
LB: lower Bound; UB: upper bound; CI:Confidence Interval

## Sheet: sex determination
Supplementary Table 2: Sex determination
Sample Name	Nseqs	NchrY+NchrX	NchrY	R_y	SE	95% CI	Assignment
T9	14623	418	29	0.0694	0.0124	0.045-0.0937	consistent with XY but not XX
T21	2342021	61782	6421	0.1039	0.0012	0.1015-0.1063	XY
T46	1267711	34518	3629	0.1051	0.0017	0.1019-0.1084	XY
F4_I	2029640	55172	5740	0.104	0.0013	0.1015-0.1066	XY
F9	24924	954	49	0.0514	0.0071	0.0374-0.0654	Not Assigned
Nseqs: Number of reads, NchrY+NchrX :reads mapping on the sexual chromosomes. R_y: Ry parameter according to Skoglund et al. 2013.

## Sheet: non-missing call vs. 1240HO
Supplementary Table 2: Non-missing call vs. 1240HO
Sample Name	Total Sites	Non Missing Calls	avg Raw Reads	avg Damage Cleaned Reads	avg Sampled From
T21	597573	31972	0.0932238	0.0932238	0.0734521
F4_I	597573	27178	0.0751239	0.0751239	0.0598521
T46	597573	17522	0.0505679	0.0505679	0.0401089
F9	597573	387	0.000948838	0.000948838	0.000784841
T9	597573	197	0.000517092	0.000517092	0.000409992
1240HO:1240K_Human Origins panel (release v42.4).

## Sheet: mtDNA
Supplementary Table 2: mtDNA analysis
Sample Name	SampleID	Coverage	Range	mt DNA Haplogroup	Rank	Quality
T9	1c_1-5	0.53	-	-	-	-
T21	2c_1-10/3c	61.16	1-16569	X2n	1	0.9605
T46	5c_1-5	44.64	1-16569	H+152	1	0.8688
F9	7c_1-5/8c	5.4	-	-	-	-
F4_I	9c/10c	91.33	1-16569	H	1	1

## Sheet: Y-chromosome
Supplementary Table 2: Y-chromosome analysis
Sample Name	Haplogroup short form, with the name of a SNP observed in the derived state	Haplogroup short form, with the name of a representative SNP	Haplogroup long form, using Y-Chromosome Consortium nomenclature
T9	-	-	-
T21	-	-	-
T46	J-Z7815	J-M304	J
F4_I	G-M3261	G-M3240	G2a2b1a2a1
F9	-	-	-

## Sheet: cv error Admixture
Supplementary Table 2: Cross-validation error ADMIXTURE
K	cv-error
2	0.46504
3	0.46491
4	0.46963
5	0.47685
6	0.48458

## Sheet: D-statistic AFR-EUR
Supplementary Table 2: D-statistics and Z-score as D(Papuan, CB; Pop1, Pop2).
Outgroup	Pop1	Pop2	Test	D	Z-score
Papuan	Mozabite	Albanian	CB	-0.001114	-1.89
Papuan	Mozabite	Bulgarian	CB	-0.000996	-1.704
Papuan	Mozabite	Croatian	CB	-0.000703	-1.223
Papuan	Mozabite	Cypriot	CB	-0.001577	-2.759
Papuan	Mozabite	Czech	CB	-0.000736	-1.271
Papuan	Mozabite	English	CB	-0.000669	-1.175
Papuan	Mozabite	French	CB	-0.00105	-1.836
Papuan	Mozabite	Greek	CB	-0.001255	-2.237
Papuan	Mozabite	Hungarian	CB	-0.000636	-1.116
Papuan	Mozabite	Italian_North	CB	-0.001743	-3.049
Papuan	Mozabite	Italian_South	CB	-0.00154	-2.738
Papuan	Mozabite	Maltese	CB	-0.001562	-2.692
Papuan	Mozabite	Romanian	CB	-0.000679	-1.175
Papuan	Mozabite	Spanish	CB	-0.001502	-2.665
Papuan	Moroccan	Albanian	CB	-0.001285	-2.172
Papuan	Moroccan	Bulgarian	CB	-0.00113	-1.948
Papuan	Moroccan	Croatian	CB	-0.00097	-1.698
Papuan	Moroccan	Cypriot	CB	-0.001926	-3.395
Papuan	Moroccan	Czech	CB	-0.00089	-1.562
Papuan	Moroccan	English	CB	-0.000899	-1.598
Papuan	Moroccan	French	CB	-0.001223	-2.167
Papuan	Moroccan	Greek	CB	-0.001512	-2.724
Papuan	Moroccan	Hungarian	CB	-0.000756	-1.344
Papuan	Moroccan	Italian_North	CB	-0.001879	-3.317
Papuan	Moroccan	Italian_South	CB	-0.00173	-3.111
Papuan	Moroccan	Maltese	CB	-0.001931	-3.35
Papuan	Moroccan	Romanian	CB	-0.000892	-1.566
Papuan	Moroccan	Spanish	CB	-0.001746	-3.127
Papuan	Libyan	Albanian	CB	-0.0003	-0.471
Papuan	Libyan	Bulgarian	CB	-0.000214	-0.34
Papuan	Libyan	Croatian	CB	-5.4e-05	-0.086
Papuan	Libyan	Cypriot	CB	-0.001222	-1.991
Papuan	Libyan	Czech	CB	0.000196	0.317
Papuan	Libyan	English	CB	0.000257	0.422
Papuan	Libyan	French	CB	-7.7e-05	-0.127
Papuan	Libyan	Greek	CB	-0.000592	-0.986
Papuan	Libyan	Hungarian	CB	0.000219	0.363
Papuan	Libyan	Italian_North	CB	-0.000963	-1.578
Papuan	Libyan	Italian_South	CB	-0.000777	-1.29
Papuan	Libyan	Maltese	CB	-0.000986	-1.602
Papuan	Libyan	Romanian	CB	-6.1e-05	-0.099
Papuan	Libyan	Spanish	CB	-0.000552	-0.917
Papuan	Tunisian	Albanian	CB	-0.001038	-1.691
Papuan	Tunisian	Bulgarian	CB	-0.00088	-1.452
Papuan	Tunisian	Croatian	CB	-0.000459	-0.762
Papuan	Tunisian	Cypriot	CB	-0.001491	-2.505
Papuan	Tunisian	Czech	CB	-0.000558	-0.934
Papuan	Tunisian	English	CB	-0.000485	-0.821
Papuan	Tunisian	French	CB	-0.000801	-1.352
Papuan	Tunisian	Greek	CB	-0.00106	-1.815
Papuan	Tunisian	Hungarian	CB	-0.000383	-0.647
Papuan	Tunisian	Italian_North	CB	-0.00157	-2.644
Papuan	Tunisian	Italian_South	CB	-0.001307	-2.239
Papuan	Tunisian	Maltese	CB	-0.00144	-2.39
Papuan	Tunisian	Romanian	CB	-0.000514	-0.866
Papuan	Tunisian	Spanish	CB	-0.001234	-2.099
Papuan	Egyptian	Albanian	CB	-0.000534	-0.902
Papuan	Egyptian	Bulgarian	CB	-0.000449	-0.78
Papuan	Egyptian	Croatian	CB	-7.6e-05	-0.132
Papuan	Egyptian	Cypriot	CB	-0.001327	-2.339
Papuan	Egyptian	Czech	CB	-3.8e-05	-0.065
Papuan	Egyptian	English	CB	0.00018	0.318
Papuan	Egyptian	French	CB	-0.000203	-0.358
Papuan	Egyptian	Greek	CB	-0.000718	-1.287
Papuan	Egyptian	Hungarian	CB	0.000134	0.236
Papuan	Egyptian	Italian_North	CB	-0.001005	-1.778
Papuan	Egyptian	Italian_South	CB	-0.00088	-1.577
Papuan	Egyptian	Maltese	CB	-0.001047	-1.83
Papuan	Egyptian	Romanian	CB	-9.3e-05	-0.163
Papuan	Egyptian	Spanish	CB	-0.000558	-0.993

## Sheet: D-statistic AFR-EST
Supplementary Table 2: D-statistics and Z-score as D(Papuan, CB; Pop1, Pop2).
Outgroup	Pop1	Pop2	Test	D	Z-score
Papuan	Mozabite	Armenian	CB	-0.000385	-0.685
Papuan	Mozabite	Azeri	CB	0.000396	0.683
Papuan	Mozabite	Georgian	CB	-0.000566	-0.996
Papuan	Mozabite	Druze	CB	-0.001341	-2.381
Papuan	Mozabite	Bedouin	CB	-0.001642	-2.892
Papuan	Mozabite	Palestinian	CB	-0.001096	-1.929
Papuan	Mozabite	Jordanian	CB	-0.001118	-1.961
Papuan	Mozabite	Lebanese	CB	-0.001197	-2.135
Papuan	Mozabite	Syrian	CB	-0.001267	-2.253
Papuan	Mozabite	Saudi	CB	-0.001785	-3.092
Papuan	Mozabite	Turkish	CB	6.3e-05	0.113
Papuan	Mozabite	Assyrian	CB	-0.000777	-1.264
Papuan	Mozabite	Yemeni	CB	-0.001478	-2.498
Papuan	Egyptian	Armenian	CB	-0.000236	-0.421
Papuan	Egyptian	Azeri	CB	0.000614	1.061
Papuan	Egyptian	Georgian	CB	-0.000432	-0.764
Papuan	Egyptian	Druze	CB	-0.001005	-1.78
Papuan	Egyptian	Bedouin	CB	-0.001171	-2.079
Papuan	Egyptian	Palestinian	CB	-0.000625	-1.099
Papuan	Egyptian	Jordanian	CB	-0.000658	-1.164
Papuan	Egyptian	Lebanese	CB	-0.000884	-1.583
Papuan	Egyptian	Syrian	CB	-0.000975	-1.73
Papuan	Egyptian	Saudi	CB	-0.001628	-2.833
Papuan	Egyptian	Turkish	CB	0.000366	0.659
Papuan	Egyptian	Assyrian	CB	-0.000556	-0.907
Papuan	Egyptian	Yemeni	CB	-0.001178	-2.006
Papuan	Moroccan	Armenian	CB	-0.000707	-1.265
Papuan	Moroccan	Azeri	CB	3.7e-05	0.064
Papuan	Moroccan	Georgian	CB	-0.000829	-1.475
Papuan	Moroccan	Druze	CB	-0.001606	-2.864
Papuan	Moroccan	Bedouin	CB	-0.002272	-4.045
Papuan	Moroccan	Palestinian	CB	-0.001557	-2.771
Papuan	Moroccan	Jordanian	CB	-0.001616	-2.844
Papuan	Moroccan	Lebanese	CB	-0.00162	-2.91
Papuan	Moroccan	Syrian	CB	-0.001799	-3.251
Papuan	Moroccan	Saudi	CB	-0.002362	-4.085
Papuan	Moroccan	Turkish	CB	-0.00022	-0.396
Papuan	Moroccan	Assyrian	CB	-0.001063	-1.759
Papuan	Moroccan	Yemeni	CB	-0.002266	-3.861
Papuan	Libyan	Armenian	CB	-4.4e-05	-0.072
Papuan	Libyan	Azeri	CB	0.000737	1.191
Papuan	Libyan	Georgian	CB	-0.000109	-0.18
Papuan	Libyan	Druze	CB	-0.000875	-1.437
Papuan	Libyan	Bedouin	CB	-0.001647	-2.705
Papuan	Libyan	Palestinian	CB	-0.000604	-0.987
Papuan	Libyan	Jordanian	CB	-0.000582	-0.942
Papuan	Libyan	Lebanese	CB	-0.000829	-1.39
Papuan	Libyan	Syrian	CB	-0.00081	-1.328
Papuan	Libyan	Saudi	CB	-0.002122	-3.4
Papuan	Libyan	Turkish	CB	0.000547	0.912
Papuan	Libyan	Assyrian	CB	-0.000371	-0.573
Papuan	Libyan	Yemeni	CB	-0.001533	-2.434
Papuan	Tunisian	Armenian	CB	-0.000351	-0.598
Papuan	Tunisian	Azeri	CB	0.00035	0.581
Papuan	Tunisian	Georgian	CB	-0.000518	-0.883
Papuan	Tunisian	Druze	CB	-0.001177	-2.013
Papuan	Tunisian	Bedouin	CB	-0.001686	-2.862
Papuan	Tunisian	Palestinian	CB	-0.001005	-1.702
Papuan	Tunisian	Jordanian	CB	-0.00095	-1.595
Papuan	Tunisian	Lebanese	CB	-0.00118	-2.027
Papuan	Tunisian	Syrian	CB	-0.001112	-1.894
Papuan	Tunisian	Saudi	CB	-0.001897	-3.178
Papuan	Tunisian	Turkish	CB	8.4e-05	0.144
Papuan	Tunisian	Assyrian	CB	-0.000681	-1.077
Papuan	Tunisian	Yemeni	CB	-0.001476	-2.4

## Sheet: D-statistic EST-EUR
Supplementary Table 2: D-statistics and Z-score as D(Papuan, CB; Pop1, Pop2).
Outgroup	Pop1	Pop2	Test	D	Z-score
Papuan	Armenian	Albanian	CB	-0.000977	-1.64
Papuan	Armenian	Bulgarian	CB	-0.000861	-1.486
Papuan	Armenian	Croatian	CB	-0.000518	-0.896
Papuan	Armenian	Cypriot	CB	-0.001439	-2.521
Papuan	Armenian	Czech	CB	-0.000499	-0.867
Papuan	Armenian	English	CB	-0.000485	-0.856
Papuan	Armenian	French	CB	-0.000708	-1.245
Papuan	Armenian	Greek	CB	-0.001132	-2.028
Papuan	Armenian	Hungarian	CB	-0.000429	-0.755
Papuan	Armenian	Italian_North	CB	-0.001432	-2.505
Papuan	Armenian	Italian_South	CB	-0.001114	-1.971
Papuan	Armenian	Maltese	CB	-0.001017	-1.761
Papuan	Armenian	Romanian	CB	-0.000498	-0.867
Papuan	Armenian	Spanish	CB	-0.000709	-1.253
Papuan	Azeri	Albanian	CB	-0.000636	-1.053
Papuan	Azeri	Bulgarian	CB	-0.000633	-1.067
Papuan	Azeri	Croatian	CB	-0.000408	-0.697
Papuan	Azeri	Cypriot	CB	-0.001155	-1.999
Papuan	Azeri	Czech	CB	-0.000443	-0.754
Papuan	Azeri	English	CB	-0.000267	-0.459
Papuan	Azeri	French	CB	-0.00046	-0.794
Papuan	Azeri	Greek	CB	-0.000855	-1.509
Papuan	Azeri	Hungarian	CB	-0.000265	-0.456
Papuan	Azeri	Italian_North	CB	-0.001194	-2.065
Papuan	Azeri	Italian_South	CB	-0.000819	-1.43
Papuan	Azeri	Maltese	CB	-0.000671	-1.135
Papuan	Azeri	Romanian	CB	-0.000244	-0.422
Papuan	Azeri	Spanish	CB	-0.000492	-0.855
Papuan	Georgian	Albanian	CB	-0.000478	-0.788
Papuan	Georgian	Bulgarian	CB	-0.000397	-0.662
Papuan	Georgian	Croatian	CB	-8e-05	-0.135
Papuan	Georgian	Cypriot	CB	-0.000915	-1.557
Papuan	Georgian	Czech	CB	-0.000185	-0.316
Papuan	Georgian	English	CB	-0.000112	-0.192
Papuan	Georgian	French	CB	-0.000229	-0.392
Papuan	Georgian	Greek	CB	-0.000693	-1.208
Papuan	Georgian	Hungarian	CB	-6e-06	-0.01
Papuan	Georgian	Italian_North	CB	-0.001025	-1.764
Papuan	Georgian	Italian_South	CB	-0.000652	-1.129
Papuan	Georgian	Maltese	CB	-0.000402	-0.675
Papuan	Georgian	Romanian	CB	-6.2e-05	-0.105
Papuan	Georgian	Spanish	CB	-0.000184	-0.316
Papuan	Druze	Albanian	CB	-0.00126	-2.11
Papuan	Druze	Bulgarian	CB	-0.001101	-1.871
Papuan	Druze	Croatian	CB	-0.000845	-1.458
Papuan	Druze	Cypriot	CB	-0.001742	-3.005
Papuan	Druze	Czech	CB	-0.00076	-1.302
Papuan	Druze	English	CB	-0.000641	-1.118
Papuan	Druze	French	CB	-0.000922	-1.606
Papuan	Druze	Greek	CB	-0.001409	-2.493
Papuan	Druze	Hungarian	CB	-0.000559	-0.972
Papuan	Druze	Italian_North	CB	-0.001723	-3.011
Papuan	Druze	Italian_South	CB	-0.001457	-2.563
Papuan	Druze	Maltese	CB	-0.00146	-2.484
Papuan	Druze	Romanian	CB	-0.000803	-1.373
Papuan	Druze	Spanish	CB	-0.001018	-1.792
Papuan	Bedouin	Albanian	CB	-0.000726	-1.213
Papuan	Bedouin	Bulgarian	CB	-0.000527	-0.905
Papuan	Bedouin	Croatian	CB	-0.000233	-0.404
Papuan	Bedouin	Cypriot	CB	-0.001541	-2.696
Papuan	Bedouin	Czech	CB	-9.4e-05	-0.163
Papuan	Bedouin	English	CB	-8.4e-05	-0.147
Papuan	Bedouin	French	CB	-0.000378	-0.664
Papuan	Bedouin	Greek	CB	-0.000941	-1.678
Papuan	Bedouin	Hungarian	CB	-3.8e-05	-0.068
Papuan	Bedouin	Italian_North	CB	-0.001231	-2.164
Papuan	Bedouin	Italian_South	CB	-0.00106	-1.876
Papuan	Bedouin	Maltese	CB	-0.000997	-1.719
Papuan	Bedouin	Romanian	CB	-0.000266	-0.462
Papuan	Bedouin	Spanish	CB	-0.000659	-1.167
Papuan	Palestinian	Albanian	CB	-0.000931	-1.595
Papuan	Palestinian	Bulgarian	CB	-0.000847	-1.471
Papuan	Palestinian	Croatian	CB	-0.000462	-0.81
Papuan	Palestinian	Cypriot	CB	-0.001613	-2.882
Papuan	Palestinian	Czech	CB	-0.000414	-0.729
Papuan	Palestinian	English	CB	-0.000341	-0.605
Papuan	Palestinian	French	CB	-0.000619	-1.099
Papuan	Palestinian	Greek	CB	-0.00116	-2.105
Papuan	Palestinian	Hungarian	CB	-0.000289	-0.517
Papuan	Palestinian	Italian_North	CB	-0.001436	-2.564
Papuan	Palestinian	Italian_South	CB	-0.001234	-2.222
Papuan	Palestinian	Maltese	CB	-0.001182	-2.062
Papuan	Palestinian	Romanian	CB	-0.000477	-0.845
Papuan	Palestinian	Spanish	CB	-0.000849	-1.528
Papuan	Jordanian	Albanian	CB	-0.000727	-1.177
Papuan	Jordanian	Bulgarian	CB	-0.000621	-1.037
Papuan	Jordanian	Croatian	CB	-0.000327	-0.549
Papuan	Jordanian	Cypriot	CB	-0.001332	-2.262
Papuan	Jordanian	Czech	CB	-0.000136	-0.229
Papuan	Jordanian	English	CB	-0.000176	-0.298
Papuan	Jordanian	French	CB	-0.00047	-0.802
Papuan	Jordanian	Greek	CB	-0.000883	-1.527
Papuan	Jordanian	Hungarian	CB	-0.000111	-0.19
Papuan	Jordanian	Italian_North	CB	-0.00127	-2.176
Papuan	Jordanian	Italian_South	CB	-0.00101	-1.732
Papuan	Jordanian	Maltese	CB	-0.001131	-1.9
Papuan	Jordanian	Romanian	CB	-0.000268	-0.45
Papuan	Jordanian	Spanish	CB	-0.000718	-1.24
Papuan	Lebanese	Albanian	CB	-0.000797	-1.375
Papuan	Lebanese	Bulgarian	CB	-0.000597	-1.05
Papuan	Lebanese	Croatian	CB	-0.000319	-0.566
Papuan	Lebanese	Cypriot	CB	-0.001405	-2.505
Papuan	Lebanese	Czech	CB	-0.000252	-0.448
Papuan	Lebanese	English	CB	-0.000164	-0.294
Papuan	Lebanese	French	CB	-0.000456	-0.818
Papuan	Lebanese	Greek	CB	-0.000945	-1.725
Papuan	Lebanese	Hungarian	CB	-0.000158	-0.283
Papuan	Lebanese	Italian_North	CB	-0.001292	-2.315
Papuan	Lebanese	Italian_South	CB	-0.001008	-1.831
Papuan	Lebanese	Maltese	CB	-0.000938	-1.663
Papuan	Lebanese	Romanian	CB	-0.000344	-0.612
Papuan	Lebanese	Spanish	CB	-0.000594	-1.076
Papuan	Syrian	Albanian	CB	-0.000664	-1.073
Papuan	Syrian	Bulgarian	CB	-0.000496	-0.817
Papuan	Syrian	Croatian	CB	-0.000148	-0.245
Papuan	Syrian	Cypriot	CB	-0.001418	-2.402
Papuan	Syrian	Czech	CB	-0.000245	-0.404
Papuan	Syrian	English	CB	-0.00016	-0.269
Papuan	Syrian	French	CB	-0.000324	-0.543
Papuan	Syrian	Greek	CB	-0.00083	-1.406
Papuan	Syrian	Hungarian	CB	-5.9e-05	-0.099
Papuan	Syrian	Italian_North	CB	-0.001126	-1.889
Papuan	Syrian	Italian_South	CB	-0.000883	-1.49
Papuan	Syrian	Maltese	CB	-0.00079	-1.309
Papuan	Syrian	Romanian	CB	-0.000123	-0.205
Papuan	Syrian	Spanish	CB	-0.000503	-0.848
Papuan	Saudi	Albanian	CB	-0.000666	-1.066
Papuan	Saudi	Bulgarian	CB	-0.000339	-0.558
Papuan	Saudi	Croatian	CB	3.9e-05	0.065
Papuan	Saudi	Cypriot	CB	-0.001449	-2.407
Papuan	Saudi	Czech	CB	0.000195	0.322
Papuan	Saudi	English	CB	9.3e-05	0.158
Papuan	Saudi	French	CB	-0.000168	-0.284
Papuan	Saudi	Greek	CB	-0.000794	-1.347
Papuan	Saudi	Hungarian	CB	0.000172	0.289
Papuan	Saudi	Italian_North	CB	-0.00104	-1.754
Papuan	Saudi	Italian_South	CB	-0.000925	-1.577
Papuan	Saudi	Maltese	CB	-0.00077	-1.277
Papuan	Saudi	Romanian	CB	-1.8e-05	-0.03
Papuan	Saudi	Spanish	CB	-0.000378	-0.644
Papuan	Turkish	Albanian	CB	-0.001012	-1.781
Papuan	Turkish	Bulgarian	CB	-0.000893	-1.6
Papuan	Turkish	Croatian	CB	-0.000702	-1.268
Papuan	Turkish	Cypriot	CB	-0.001292	-2.346
Papuan	Turkish	Czech	CB	-0.000673	-1.221
Papuan	Turkish	English	CB	-0.000614	-1.124
Papuan	Turkish	French	CB	-0.000782	-1.428
Papuan	Turkish	Greek	CB	-0.001104	-2.058
Papuan	Turkish	Hungarian	CB	-0.00052	-0.953
Papuan	Turkish	Italian_North	CB	-0.001446	-2.649
Papuan	Turkish	Italian_South	CB	-0.001107	-2.04
Papuan	Turkish	Maltese	CB	-0.000971	-1.743
Papuan	Turkish	Romanian	CB	-0.000601	-1.092
Papuan	Turkish	Spanish	CB	-0.000763	-1.404
Papuan	Assyrian	Albanian	CB	-0.00029	-0.422
Papuan	Assyrian	Bulgarian	CB	2.1e-05	0.032
Papuan	Assyrian	Croatian	CB	0.000416	0.616
Papuan	Assyrian	Cypriot	CB	-0.000942	-1.427
Papuan	Assyrian	Czech	CB	0.00023	0.346
Papuan	Assyrian	English	CB	0.00037	0.553
Papuan	Assyrian	French	CB	9.3e-05	0.14
Papuan	Assyrian	Greek	CB	-0.000383	-0.586
Papuan	Assyrian	Hungarian	CB	0.000491	0.739
Papuan	Assyrian	Italian_North	CB	-0.000681	-1.024
Papuan	Assyrian	Italian_South	CB	-0.00041	-0.62
Papuan	Assyrian	Maltese	CB	-0.000366	-0.541
Papuan	Assyrian	Romanian	CB	9.6e-05	0.147
Papuan	Assyrian	Spanish	CB	4.8e-05	0.073
Papuan	Yemeni	Albanian	CB	-1.5e-05	-0.023
Papuan	Yemeni	Bulgarian	CB	0.000215	0.348
Papuan	Yemeni	Croatian	CB	0.000599	0.976
Papuan	Yemeni	Cypriot	CB	-0.00107	-1.752
Papuan	Yemeni	Czech	CB	0.000696	1.124
Papuan	Yemeni	English	CB	0.000781	1.28
Papuan	Yemeni	French	CB	0.000486	0.797
Papuan	Yemeni	Greek	CB	-0.000217	-0.362
Papuan	Yemeni	Hungarian	CB	0.000794	1.302
Papuan	Yemeni	Italian_North	CB	-0.000575	-0.949
Papuan	Yemeni	Italian_South	CB	-0.000419	-0.698
Papuan	Yemeni	Maltese	CB	-0.000443	-0.713
Papuan	Yemeni	Romanian	CB	0.000436	0.706
Papuan	Yemeni	Spanish	CB	4.5e-05	0.074
