# Supplementary material for: First Glimpse into the Genomic Characterization of People from the Imperial Roman Community of Casal Bertone (Rome, First–Third Centuries AD)
Source: Genes (Basel). 2022 Jan 13;13(1):136. doi: 10.3390/genes13010136 (PMC8774527; doi:10.3390/genes13010136)
Supplement: Supplementary file 1 [file genes-13-00136-s001.zip › Supplementary Table S3.xlsx]

## Sheet: T21_bacteria
Supplementary Table S3: Microbial findings for T21.
Number of reads covered by the clade rooted at this taxon	Number of reads assigned directly to this taxon	Rank code*	NCBI taxonomy ID	Indented scientific name
18146	6096	G	507	Alcaligenes
12050	12050	S	511	Alcaligenes faecalis
17	12	G	222	Achromobacter
3	3	S	217203	Achromobacter spanius
2	2	S	85698	Achromobacter xylosoxidans
5	0	G	305976	Pusillimonas
5	5	S	1007105	Pusillimonas sp. T7-7
2	0	G	290425	Advenella
2	0	S	310575	Advenella kashmirensis
2	2	S1	1036672	Advenella kashmirensis WT001
484	3	G	48736	Ralstonia
405	405	S	305	Ralstonia solanacearum
71	71	S	190721	Ralstonia insidiosa
5	2	S	329	Ralstonia pickettii
3	3	S1	428406	Ralstonia pickettii 12D
113	90	G	32008	Burkholderia
12	12	S	1705310	Burkholderia sp. IDO3
5	1	G1	87882	Burkholderia cepacia complex
4	4	S	95486	Burkholderia cenocepacia
5	0	G1	111527	pseudomallei group
5	5	S	1637831	Burkholderia sp. MSMB617WGS
1	0	S	337	Burkholderia glumae
1	1	S1	626418	Burkholderia glumae BGR1
4	0	G	1822464	Paraburkholderia
4	4	S	2026199	Paraburkholderia aromaticivorans
3	3	G	106589	Cupriavidus
62	6	G	47420	Hydrogenophaga
32	32	S	2184519	Hydrogenophaga sp. NH-16
19	19	S	1842537	Hydrogenophaga sp. RAC07
5	5	S	795665	Hydrogenophaga sp. PBC
48	0	G	2490452	Serpentinomonas
48	48	S	1458426	Serpentinomonas mccroryi
47	21	G	34072	Variovorax
20	20	S	436515	Variovorax boronicumulans
6	3	S	34073	Variovorax paradoxus
2	2	S1	1246301	Variovorax paradoxus B4
1	1	S1	543728	Variovorax paradoxus S110
43	2	G	52972	Polaromonas
41	41	S	296591	Polaromonas sp. JS666
18	9	G	12916	Acidovorax
8	8	S	232721	Acidovorax sp. JS42
1	1	S	553814	Acidovorax carolinensis
7	7	G	80865	Delftia
3	3	G	283	Comamonas
1	0	G	665874	Limnohabitans
1	1	S	1678129	Limnohabitans sp. 103DPR2
1	0	G	1649468	Melaminivora
1	1	S	2109913	Melaminivora sp. SC2-9
57	54	G	149698	Massilia
2	2	S	2045208	Massilia violaceinigra
1	1	S	1141883	Massilia putida
1	0	G	29580	Janthinobacterium
1	0	S	55508	Janthinobacterium agaricidamnosum
1	1	S1	1349767	Janthinobacterium agaricidamnosum NBRC 102515 = DSM 9628
2	0	G	316612	Methylibium
2	0	S	105560	Methylibium petroleiphilum
2	2	S1	420662	Methylibium petroleiphilum PM1
64	0	G	482	Neisseria
64	64	S	485	Neisseria gonorrhoeae
2	0	G	168470	Laribacter
2	2	S	168471	Laribacter hongkongensis
8	0	G	551759	Aromatoleum
8	0	S	551760	Aromatoleum aromaticum
8	8	S1	76114	Aromatoleum aromaticum EbN1
3	0	G	33057	Thauera
2	0	S	59405	Thauera aromatica
2	2	S1	44139	Thauera aromatica K172
1	1	S	85643	Thauera sp. MZ1T
2	0	G	359407	Methylotenera
2	0	S	359408	Methylotenera mobilis
2	2	S1	583345	Methylotenera mobilis JLW8
1	0	G	914	Nitrosomonas
1	1	S	44577	Nitrosomonas ureae
1664	886	G	286	Pseudomonas
727	14	G1	136846	Pseudomonas stutzeri group
713	0	G2	578833	Pseudomonas stutzeri subgroup
713	70	S	316	Pseudomonas stutzeri
642	642	S1	1123519	Pseudomonas stutzeri DSM 10701
1	1	S1	1196835	Pseudomonas stutzeri CCUG 29243
9	9	S	2054914	Pseudomonas sp. 02C 26
9	2	G1	136841	Pseudomonas aeruginosa group
6	6	S	287	Pseudomonas aeruginosa
1	1	S	300	Pseudomonas mendocina
8	1	G1	136849	Pseudomonas syringae group
6	6	S	33069	Pseudomonas viridiflava
1	0	G2	251695	Pseudomonas syringae group genomosp. 1
1	1	S	317	Pseudomonas syringae
7	0	G1	136843	Pseudomonas fluorescens group
3	3	S	47878	Pseudomonas azotoformans
3	3	S	75612	Pseudomonas mandelii
1	1	S	294	Pseudomonas fluorescens
6	6	S	1415630	Pseudomonas sp. TKP
3	3	S	198620	Pseudomonas koreensis
2	2	S	2083053	Pseudomonas sp. SWI44
2	2	S	253237	Pseudomonas sp. phDV1
1	1	S	797277	Pseudomonas litoralis
1	1	S	312306	Pseudomonas entomophila
1	0	G1	136842	Pseudomonas chlororaphis group
1	1	S	47884	Pseudomonas taetrolens
1	1	S	104087	Pseudomonas frederiksbergensis
1	1	S	2479393	Pseudomonas sp. LTGT-11-2Z
3	0	G	1849530	Oblitimonas
3	3	S	1697053	Oblitimonas alkaliphila
130	77	G	469	Acinetobacter
13	13	S	1636603	Acinetobacter sp. ACNIH1
10	10	S	1608473	Acinetobacter sp. NCu2D-2
10	0	G1	909768	Acinetobacter calcoaceticus/baumannii complex
7	7	S	470	Acinetobacter baumannii
3	3	S	471	Acinetobacter calcoaceticus
9	9	S	28090	Acinetobacter lwoffii
9	5	S	40214	Acinetobacter johnsonii
4	4	S1	1242245	Acinetobacter johnsonii XBB1
1	1	S	2004646	Acinetobacter sp. WCHA55
1	1	S	756892	Acinetobacter indicus
31	31	G	497	Psychrobacter
11	0	G	475	Moraxella
11	11	S	34062	Moraxella osloensis
270	3	G	547	Enterobacter
264	3	G1	354276	Enterobacter cloacae complex
261	261	S	550	Enterobacter cloacae
3	3	S	399742	Enterobacter sp. 638
183	1	G	570	Klebsiella
182	0	S	573	Klebsiella pneumoniae
182	182	S1	72407	Klebsiella pneumoniae subsp. pneumoniae
18	15	G	544	Citrobacter
3	3	G1	1344959	Citrobacter freundii complex
7	0	G	561	Escherichia
7	7	S	562	Escherichia coli
2	0	G	160674	Raoultella
2	2	S	577	Raoultella terrigena
1	0	G	413496	Cronobacter
1	1	S	28141	Cronobacter sakazakii
46	21	G	53335	Pantoea
20	0	G1	1654067	Pantoea agglomerans group
20	20	S	549	Pantoea agglomerans
5	5	S	553	Pantoea ananatis
7	0	G	551	Erwinia
4	4	S	55211	Erwinia persicina
3	3	S	1619313	Erwinia gerundensis
28	10	G	613	Serratia
18	18	S	618	Serratia odorifera
1	1	G	34037	Rahnella
3	3	G	122277	Pectobacterium
2	0	G	581	Morganella
2	2	S	582	Morganella morganii
243	0	G	745	Pasteurella
243	0	S	747	Pasteurella multocida
243	243	S1	44283	Pasteurella multocida subsp. multocida
30	12	G	338	Xanthomonas
17	17	S	339	Xanthomonas campestris
1	1	S	56458	Xanthomonas sacchari
15	9	G	40323	Stenotrophomonas
5	5	S	216778	Stenotrophomonas rhizophila
1	1	G1	995085	Stenotrophomonas maltophilia group
6	0	G	83618	Pseudoxanthomonas
4	0	S	415229	Pseudoxanthomonas spadix
4	4	S1	1045855	Pseudoxanthomonas spadix BD-a59
2	0	S	314722	Pseudoxanthomonas suwonensis
2	2	S1	743721	Pseudoxanthomonas suwonensis 11-1
3	0	G	83614	Luteimonas
2	2	S	2508168	Luteimonas sp. YGD11-2
1	1	S	2006110	Luteimonas sp. 100111
2	2	G	68	Lysobacter
37	5	G	445	Legionella
31	31	S	446	Legionella pneumophila
1	1	S	454	Legionella israelensis
13	0	G	43947	Tolumonas
13	0	S	43948	Tolumonas auensis
13	13	S1	595494	Tolumonas auensis DSM 9187
8	7	G	642	Aeromonas
1	0	S	651	Aeromonas media
1	1	S1	1208104	Aeromonas media WS
18	15	G	59753	Alcanivorax
3	3	S	1094342	Alcanivorax xenomutans
12	3	G	662	Vibrio
6	0	G1	717610	Vibrio harveyi group
6	6	S	680	Vibrio campbellii
3	3	S	673372	Vibrio casei
6	0	G	1744881	Sulfuricaulis
6	6	S	1620215	Sulfuricaulis limicola
2	1	G	22	Shewanella
1	1	S	2029986	Shewanella sp. WE21
1	0	G	53246	Pseudoalteromonas
1	1	S	621376	Pseudoalteromonas donghaensis
2	0	G	67575	Rheinheimera
2	2	S	2498451	Rheinheimera sp. LHK132
1	0	G	10	Cellvibrio
1	1	S	1945512	Cellvibrio sp. PSBB023
283	36	G	528	Ochrobactrum
247	247	S	271865	Ochrobactrum sp. A44
19	19	G	407	Methylobacterium
6	1	G	2282523	Methylorubrum
4	4	S	408	Methylorubrum extorquens
1	1	S	223967	Methylorubrum populi
8	8	G	85413	Bosea
5	5	G	374	Bradyrhizobium
2	0	G	911	Nitrobacter
2	0	S	912	Nitrobacter hamburgensis
2	2	S1	323097	Nitrobacter hamburgensis X14
11	3	G	379	Rhizobium
3	0	S	384	Rhizobium leguminosarum
3	3	S1	387	Rhizobium leguminosarum bv. viciae
3	3	S	1125847	Rhizobium sp. NT-26
2	2	S	1869170	Rhizobium sp. S41
3	2	G	357	Agrobacterium
1	0	G1	1183400	Agrobacterium tumefaciens complex
1	1	S	358	Agrobacterium tumefaciens
6	1	G	28105	Sinorhizobium
5	5	S	382	Sinorhizobium meliloti
14	0	G	449972	Chelativorans
14	14	S	266779	Chelativorans sp. BNC1
2	0	G	46913	Devosia
2	2	S	2083786	Devosia sp. I507
1	1	G	133	Methylocystis
9	4	G	13687	Sphingomonas
5	5	S	1030157	Sphingomonas sp. KC8
6	5	G	165697	Sphingopyxis
1	1	S	2054227	Sphingopyxis sp. WS5A3p
17	8	G	265	Paracoccus
5	5	S	147645	Paracoccus yeei
3	3	S	266	Paracoccus denitrificans
1	1	S	2500532	Paracoccus sp. Arc7-R13
16	11	G	41275	Brevundimonas
5	5	S	293	Brevundimonas diminuta
5	0	G	39643	Sorangium
5	5	S	56	Sorangium cellulosum
3451	969	G	1329200	Fictibacillus
2482	2482	S	255247	Fictibacillus arsenicus
1368	878	G	1386	Bacillus
187	184	S	79880	Bacillus clausii
3	3	S1	66692	Bacillus clausii KSM-K16
88	61	G1	653685	Bacillus subtilis group
16	0	G2	653388	Bacillus mojavensis subgroup
16	16	S	260554	Bacillus halotolerans
8	8	S	1402	Bacillus licheniformis
1	1	S	1423	Bacillus subtilis
1	1	S	119858	Bacillus sonorensis
1	1	S	1648923	Bacillus paralicheniformis
65	37	G1	86661	Bacillus cereus group
24	9	S	1428	Bacillus thuringiensis
10	0	S1	180854	Bacillus thuringiensis serovar huazhongensis
10	10	S2	527030	Bacillus thuringiensis serovar huazhongensis BGSC 4BD1
5	0	S1	180877	Bacillus thuringiensis serovar pulsiensis
5	5	S2	527028	Bacillus thuringiensis serovar pulsiensis BGSC 4CC1
3	0	S	1396	Bacillus cereus
3	3	S1	526973	Bacillus cereus m1293
1	1	S	64104	Bacillus pseudomycoides
26	20	S	86665	Bacillus halodurans
6	6	S1	272558	Bacillus halodurans C-125
25	25	S	1479	Bacillus smithii
25	25	S	35841	Bacillus thermoamylovorans
21	21	S	1408	Bacillus pumilus
17	17	S	1565991	Bacillus sp. X1(2014)
8	8	S	561879	Bacillus safensis
5	0	S	665099	Bacillus oceanisediminis
5	5	S1	1196031	Bacillus oceanisediminis 2691
3	3	S	1397	Bacillus circulans
3	3	S	1783501	Bacillus freudenreichii
3	3	S	352858	Bacillus sp. Y1
3	3	G1	1792192	Bacillus altitudinis complex
3	3	S	33932	Bacillus cohnii
3	0	S	1478	Bacillus simplex
3	3	S1	1349754	Bacillus simplex NBRC 15720 = DSM 1321
2	2	S	228899	Bacillus asahii
1	0	S	79885	Bacillus pseudofirmus
1	1	S1	398511	Bacillus pseudofirmus OF4
1	1	S	1404	Bacillus megaterium
1	1	S	1215031	Bacillus thermocopriae
344	309	G	129337	Geobacillus
22	22	S	471223	Geobacillus sp. WCH70
12	11	S	33940	Geobacillus thermodenitrificans
1	1	S1	420246	Geobacillus thermodenitrificans NG80-2
1	1	G1	1505648	Geobacillus thermoleovorans group
54	0	G	1055323	Aeribacillus
54	54	S	33936	Aeribacillus pallidus
5	2	G	400634	Lysinibacillus
3	3	S	2072025	Lysinibacillus sp. YS11
4	4	G	150247	Anoxybacillus
4	0	G	1906945	Parageobacillus
4	4	S	1295642	Parageobacillus genomosp. 1
3	0	G	84406	Virgibacillus
3	3	S	1911587	Virgibacillus sp. 6R
3	0	G	182709	Oceanobacillus
3	0	S	746691	Oceanobacillus kimchii
3	3	S1	1238184	Oceanobacillus kimchii X50
1	0	G	29331	Amphibacillus
1	0	S	1449	Amphibacillus xylanus
1	1	S1	698758	Amphibacillus xylanus NBRC 15112
715	0	G	1677050	Novibacillus
715	715	S	1471761	Novibacillus thermophilus
114	0	G	2023	Thermoactinomyces
114	114	S	2026	Thermoactinomyces vulgaris
20	20	S	2490858	Thermoactinomycetaceae bacterium SCSIO 07575
11	0	G	292635	Laceyella
11	11	S	37482	Laceyella sacchari
757	199	G	1279	Staphylococcus
419	417	S	1280	Staphylococcus aureus
2	2	S1	46170	Staphylococcus aureus subsp. aureus
34	34	S	29382	Staphylococcus cohnii
19	19	S	1282	Staphylococcus epidermidis
17	17	S	1290	Staphylococcus hominis
16	16	S	1288	Staphylococcus xylosus
13	13	S	1296	Staphylococcus sciuri
11	11	S	1283	Staphylococcus haemolyticus
11	11	S	2025492	Staphylococcus sp. M0911
8	8	S	29385	Staphylococcus saprophyticus
5	5	S	246432	Staphylococcus equorum
4	4	S	214473	Staphylococcus nepalensis
1	1	S	29388	Staphylococcus capitis
13	0	G	45669	Salinicoccus
13	13	S	407035	Salinicoccus halodurans
2	0	G	227979	Jeotgalicoccus
2	2	S	1461582	Jeotgalicoccus saudimassiliensis
560	0	G	76632	Thermobacillus
560	0	S	377615	Thermobacillus composti
560	560	S1	717605	Thermobacillus composti KWC4
41	26	G	44249	Paenibacillus
5	5	S	867076	Paenibacillus sp. IHB B 3084
3	3	S	1536775	Paenibacillus sp. FSL H7-0737
3	3	S	189426	Paenibacillus odorifer
2	2	S	162209	Paenibacillus naphthalenovorans
1	1	S	1406	Paenibacillus polymyxa
1	1	S	59843	Paenibacillus glucanolyticus
2	0	G	55079	Aneurinibacillus
2	2	S	1450761	Aneurinibacillus sp. XH2
1	0	G	55080	Brevibacillus
1	1	S	2496837	Brevibacillus sp. SCSIO 07484
515	0	G	160795	Ureibacillus
515	515	S	51173	Ureibacillus thermosphaericus
1	0	G	648800	Solibacillus
1	1	S	76853	Solibacillus silvestris
528	26	G	1470540	Jeotgalibaca
490	490	S	2496265	Jeotgalibaca sp. H21T32
11	11	S	1903686	Jeotgalibaca sp. PTS2502
1	1	S	708126	Jeotgalibaca dankookensis
3	0	G	2747	Carnobacterium
2	2	S	208596	Carnobacterium sp. 17-4
1	0	S	147709	Carnobacterium inhibens
1	1	S1	1266845	Carnobacterium inhibens subsp. gilichinskyi
90	46	G	1301	Streptococcus
41	41	S	1314	Streptococcus pyogenes
3	3	S	1335	Streptococcus equinus
3	0	G	1357	Lactococcus
3	3	S	1366	Lactococcus raffinolactis
47	4	G	1350	Enterococcus
26	26	S	33945	Enterococcus avium
12	12	S	1352	Enterococcus faecium
2	2	S	1351	Enterococcus faecalis
2	2	S	1354	Enterococcus hirae
1	1	S	44008	Enterococcus cecorum
2	0	G	51668	Tetragenococcus
2	2	S	290335	Tetragenococcus koreensis
35	21	G	1375	Aerococcus
13	13	S	51665	Aerococcus urinaeequi
1	1	S	1377	Aerococcus viridans
25	12	G	1578	Lactobacillus
6	6	S	1598	Lactobacillus reuteri
3	3	S	47770	Lactobacillus crispatus
1	1	S	1580	Lactobacillus brevis
1	1	S	28038	Lactobacillus curvatus
1	1	S	60520	Lactobacillus paraplantarum
1	1	S	1589	Lactobacillus pentosus
4	1	G	46255	Weissella
2	2	S	137591	Weissella cibaria
1	1	S	1583	Weissella confusa
1798	1182	G	1485	Clostridium
574	559	S	1491	Clostridium botulinum
6	0	S1	36826	Clostridium botulinum A
6	6	S2	498214	Clostridium botulinum A3 str. Loch Maree
4	4	S1	1408284	Clostridium botulinum Prevot_594
3	0	S1	36827	Clostridium botulinum B
2	0	S2	591968	Clostridium botulinum B1
2	2	S3	498213	Clostridium botulinum B1 str. Okra
1	1	S2	935198	Clostridium botulinum B str. Eklund 17B (NRP)
2	2	S1	941968	Clostridium botulinum H04402 065
23	23	S	1216932	Clostridium bornimense
10	10	S	1534	Clostridium kluyveri
3	3	S	1494	Clostridium cochlearium
3	3	S	1502	Clostridium perfringens
2	2	S	182773	Clostridium isatidis
1	1	S	1513	Clostridium tetani
223	223	S	2082193	Clostridiaceae bacterium 14S0207
696	0	G	2733	Symbiobacterium
696	0	S	2734	Symbiobacterium thermophilum
696	696	S1	292459	Symbiobacterium thermophilum IAM 14863
29	6	G	2304692	Hungateiclostridium
12	12	S	1677857	Hungateiclostridium saccincola
8	0	S	288965	Hungateiclostridium clariflavum
8	8	S1	720554	Hungateiclostridium clariflavum DSM 19732
3	3	S	1515	Hungateiclostridium thermocellum
5	0	G	2304691	Thermoclostridium
5	5	S	1510	Thermoclostridium stercorarium
1	0	G	1508657	Ruminiclostridium
1	0	S	1521	Ruminiclostridium cellulolyticum
1	1	S1	394503	Ruminiclostridium cellulolyticum H10
22	22	S	29343	[Clostridium] cellulosi
14	0	G	1663717	Herbinix
14	14	S	1679721	Herbinix luporum
2	0	G	207244	Anaerostipes
2	2	S	649756	Anaerostipes hadrus
11	3	G	1562	Desulfotomaculum
8	8	S	1833852	Desulfotomaculum ferrireducens
7	1	G	73918	Thermaerobacter
6	6	S	2546351	Thermaerobacter sp. FW80
3	0	G	365348	Pelosinus
3	0	S	365349	Pelosinus fermentans
3	3	S1	1192197	Pelosinus fermentans JBW45
1	0	G	162289	Peptoniphilus
1	1	S	54005	Peptoniphilus harei
1	0	G	1647	Erysipelothrix
1	1	S	1514105	Erysipelothrix larvae
2470	380	G	1839	Nocardioides
2031	2031	S	110319	Nocardioides sp. CF8
36	0	S	450734	Nocardioides dokdonensis
36	36	S1	1300347	Nocardioides dokdonensis FR1436
18	18	S	196162	Nocardioides sp. JS614
5	5	S	2500546	Nocardioides sp. HY056
15	0	G	2040	Aeromicrobium
15	0	S	219314	Aeromicrobium marinum
15	15	S1	585531	Aeromicrobium marinum DSM 15272
392	13	G	1912216	Cutibacterium
377	377	S	1747	Cutibacterium acnes
2	2	S	33011	Cutibacterium granulosum
17	0	G	72763	Tessaracoccus
16	16	S	1909732	Tessaracoccus sp. T2.5-30
1	1	S	1610493	Tessaracoccus flavus
406	149	G	1716	Corynebacterium
229	229	S	1705	Corynebacterium stationis
13	0	S	160386	Corynebacterium casei
13	13	S1	1285583	Corynebacterium casei LMG S-19264
4	4	S	1718	Corynebacterium glutamicum
4	4	S	1697	Corynebacterium ammoniagenes
3	3	S	43770	Corynebacterium striatum
2	0	S	161879	Corynebacterium kroppenstedtii
2	2	S1	645127	Corynebacterium kroppenstedtii DSM 44385
1	0	S	575200	Corynebacterium maris
1	1	S1	1224163	Corynebacterium maris DSM 45190
1	0	S	1727	Corynebacterium variabile
1	1	S1	858619	Corynebacterium variabile DSM 44702
223	2	G	2053	Gordonia
217	217	S	1004901	Gordonia iterans
4	0	S	84595	Gordonia polyisoprenivorans
4	4	S1	1112204	Gordonia polyisoprenivorans VH2
195	187	G	1827	Rhodococcus
6	4	S	1833	Rhodococcus erythropolis
2	2	S1	1136179	Rhodococcus erythropolis CCM2595
1	1	S	1830	Rhodococcus ruber
1	1	S	1045808	Rhodococcus sp. YL-1
72	5	G	1866885	Mycolicibacterium
29	29	S	1797	Mycolicibacterium thermoresistibile
26	0	S	46351	Mycolicibacterium hassiacum
26	26	S1	1122247	Mycolicibacterium hassiacum DSM 44199
6	0	S	1810	Mycolicibacterium vaccae
6	6	S1	1354275	Mycolicibacterium vaccae 95051
5	5	S	1804	Mycolicibacterium gilvum
1	0	S	36814	Mycolicibacterium rhodesiae
1	1	S1	710685	Mycolicibacterium rhodesiae NBB3
11	6	G	1763	Mycobacterium
5	5	S	1682113	Mycobacterium sp. YC-RL4
5	0	G	1073531	Mycolicibacter
5	5	S	875328	Mycolicibacter sinensis
3	0	G	37914	Dietzia
3	3	S	499555	Dietzia timorensis
68	14	G	1663	Arthrobacter
26	26	S	1806905	Arthrobacter sp. ZXY-2
13	13	S	2079227	Arthrobacter sp. PGP41
10	10	S	37928	Arthrobacter crystallopoietes
3	3	S	1771959	Arthrobacter sp. ATCC 21022
2	2	S	1118963	Arthrobacter sp. Rue61a
39	1	G	1742989	Glutamicibacter
32	0	S	256701	Glutamicibacter arilaitensis
32	32	S1	861360	Glutamicibacter arilaitensis Re117
6	6	S	37929	Glutamicibacter nicotianae
28	0	G	1269	Micrococcus
28	28	S	1270	Micrococcus luteus
17	1	G	57493	Kocuria
14	14	S	71999	Kocuria palustris
1	1	S	1275	Kocuria rosea
1	1	S	446860	Kocuria flava
4	0	G	1742993	Pseudarthrobacter
3	0	S	361575	Pseudarthrobacter phenanthrenivorans
3	3	S1	930171	Pseudarthrobacter phenanthrenivorans Sphe3
1	0	S	85085	Pseudarthrobacter chlorophenolicus
1	1	S1	452863	Pseudarthrobacter chlorophenolicus A6
1	1	G	32207	Rothia
1	0	G	1742992	Paenarthrobacter
1	0	S	43663	Paenarthrobacter aurescens
1	1	S1	290340	Paenarthrobacter aurescens TC1
54	22	G	1696	Brevibacterium
14	14	S	629680	Brevibacterium sandarakinum
10	10	S	273384	Brevibacterium aurantiacum
8	8	S	1703	Brevibacterium linens
12	0	G	337004	Microcella
12	12	S	279828	Microcella alkaliphila
5	2	G	55968	Leucobacter
3	3	S	1784719	Leucobacter triazinivorans
4	0	G	2034	Curtobacterium
4	4	S	1905847	Curtobacterium sp. BH-2-1-1
2	2	G	190323	Plantibacter
1	0	G	33882	Microbacterium
1	1	S	912630	Microbacterium sp. LKL04
1	0	G	33886	Rathayibacter
1	0	S	110937	Rathayibacter festucae
1	1	S1	1328866	Rathayibacter festucae DSM 15932
32	9	G	43668	Brachybacterium
13	0	S	43669	Brachybacterium faecium
13	13	S1	446465	Brachybacterium faecium DSM 4810
6	6	S	1903186	Brachybacterium sp. P6-10-X1
3	3	S	2017485	Brachybacterium sp. VR2415
1	1	S	556288	Brachybacterium saurashtrense
2	0	G	43673	Jonesia
2	2	S	43674	Jonesia denitrificans
2	0	G	60919	Sanguibacter
2	0	S	60920	Sanguibacter keddieii
2	2	S1	446469	Sanguibacter keddieii DSM 10542
1	0	G	57499	Kytococcus
1	0	S	1276	Kytococcus sedentarius
1	1	S1	478801	Kytococcus sedentarius DSM 20547
637	0	G	83677	Thermobifida
637	0	S	2021	Thermobifida fusca
637	637	S1	269800	Thermobifida fusca YX
25	0	G	2013	Nocardiopsis
19	0	S	53437	Nocardiopsis alba
19	19	S1	1205910	Nocardiopsis alba ATCC BAA-2165
6	6	S	2014	Nocardiopsis dassonvillei
28	0	G	2019	Thermomonospora
28	0	S	2020	Thermomonospora curvata
28	28	S1	471852	Thermomonospora curvata DSM 43183
548	65	G	1851	Saccharomonospora
326	0	S	1852	Saccharomonospora viridis
326	326	S1	471857	Saccharomonospora viridis DSM 43017
100	0	S	40990	Saccharomonospora glauca
100	100	S1	928724	Saccharomonospora glauca K62
56	0	S	40988	Saccharomonospora azurea
56	56	S1	882081	Saccharomonospora azurea NA-128
1	0	S	40989	Saccharomonospora cyanea
1	1	S1	882082	Saccharomonospora cyanea NA-134
6	1	G	1813	Amycolatopsis
5	5	S	1804986	Amycolatopsis albispora
3	0	G	1847	Pseudonocardia
3	3	S	2074	Pseudonocardia autotrophica
300	0	G	147067	Thermobispora
300	0	S	2006	Thermobispora bispora
300	300	S1	469371	Thermobispora bispora DSM 43833
143	127	G	1883	Streptomyces
9	9	S	1535768	Streptomyces lunaelactis
5	0	S	1950	Streptomyces peucetius
5	0	S1	55158	Streptomyces peucetius subsp. caesius
5	5	S2	316280	Streptomyces peucetius subsp. caesius ATCC 27952
2	2	S	1827580	Streptomyces nigra
23	20	G	1873	Micromonospora
2	2	S	47872	Micromonospora purpureochromogenes
1	1	S	47850	Micromonospora aurantiaca
2	0	G	84593	Verrucosispora
2	0	S	1003110	Verrucosispora maris
2	2	S1	263358	Verrucosispora maris AB-18-032
18	8	G	1678	Bifidobacterium
4	4	S	1681	Bifidobacterium bifidum
2	2	S	1680	Bifidobacterium adolescentis
2	2	S	1686	Bifidobacterium catenulatum
1	1	S	1683	Bifidobacterium angulatum
1	1	S	78344	Bifidobacterium gallinarum
2	0	G	38501	Blastococcus
2	0	S	138336	Blastococcus saxobsidens
2	2	S1	1146883	Blastococcus saxobsidens DD2
2	0	G	102106	Collinsella
2	2	S	74426	Collinsella aerofaciens
97	67	G	270	Thermus
21	21	S	274	Thermus thermophilus
9	0	S	37636	Thermus scotoductus
9	9	S1	743525	Thermus scotoductus SA-01
21	0	G	2056	Sphaerobacter
21	0	S	2057	Sphaerobacter thermophilus
21	21	S1	479434	Sphaerobacter thermophilus DSM 20745
3	0	G	120961	Roseiflexus
3	0	S	120962	Roseiflexus castenholzii
3	3	S1	383372	Roseiflexus castenholzii DSM 13941
1839	33	G	76831	Myroides
1803	0	S	256	Myroides odoratus
1803	1803	S1	929704	Myroides odoratus DSM 2801
3	3	S	1583100	Myroides sp. A21
17	5	G	59732	Chryseobacterium
10	10	S	254	Chryseobacterium indoltheticum
2	2	S	253	Chryseobacterium indologenes
15	3	G	237	Flavobacterium
12	12	S	1306519	Flavobacterium commune
332	5	G	28453	Sphingobacterium
327	327	S	1538644	Sphingobacterium sp. ML3W
1	0	G	84567	Pedobacter
1	1	S	363852	Pedobacter ginsengisoli
3	3	G	838	Prevotella
3	0	G	29548	Rhodothermus
3	3	S	29549	Rhodothermus marinus
1	1	G	89966	Hymenobacter
5	0	G	71666	Waddlia
5	0	S	71667	Waddlia chondrophila
5	5	S1	716544	Waddlia chondrophila WSU 86-1044
3	0	G	2735	Verrucomicrobium
3	0	S	2736	Verrucomicrobium spinosum
3	3	S1	240016	Verrucomicrobium spinosum DSM 4136 = JCM 18804
2	2	G	1234	Nitrospira
1	0	G	848	Fusobacterium
1	1	S	851	Fusobacterium nucleatum
1	0	G	332162	Candidatus Solibacter
1	0	S	332163	Candidatus Solibacter usitatus
1	1	S1	234267	Candidatus Solibacter usitatus Ellin6076
Tot G=198 Tot S=408
*A rank code, indicating (U)nclassified, (D)omain, (K)ingdom, (P)hylum, (C)lass, (O)rder, (F)amily, (G)enus, or (S)pecies. All other ranks are simply filled with a dash.

## Sheet: T21_femur_bacteria
Number of reads covered by the clade rooted at this taxon	Number of reads assigned directly to this taxon	Rank code*	NCBI taxonomy ID	Indented scientific name
2334	2077	G	286	Pseudomonas
154	1	G1	136846	Pseudomonas stutzeri group
153	0	G2	578833	Pseudomonas stutzeri subgroup
153	21	S	316	Pseudomonas stutzeri
132	132	S1	1123519	Pseudomonas stutzeri DSM 10701
17	5	G1	136841	Pseudomonas aeruginosa group
12	12	S	287	Pseudomonas aeruginosa
14	14	S	163011	Pseudomonas lini
14	14	S	1392877	Pseudomonas oryzae
13	3	G1	136843	Pseudomonas fluorescens group
9	9	S	294	Pseudomonas fluorescens
1	1	S	47878	Pseudomonas azotoformans
10	10	S	1930532	Pseudomonas sp. CC6-YY-74
9	0	G1	136849	Pseudomonas syringae group
7	0	G2	251695	Pseudomonas syringae group genomosp. 1
7	7	S	317	Pseudomonas syringae
2	2	S	33069	Pseudomonas viridiflava
8	8	S	198618	Pseudomonas umsongensis
7	2	G1	136845	Pseudomonas putida group
5	5	S	303	Pseudomonas putida
4	4	S	1415630	Pseudomonas sp. TKP
2	2	S	2320270	Pseudomonas sp. DG56-2
2	2	S	2054914	Pseudomonas sp. 02C 26
1	1	S	2083055	Pseudomonas sp. LH1G9
1	0	G1	136842	Pseudomonas chlororaphis group
1	1	S	47884	Pseudomonas taetrolens
1	1	S	797277	Pseudomonas litoralis
1	0	G	1849530	Oblitimonas
1	1	S	1697053	Oblitimonas alkaliphila
911	4	G	475	Moraxella
907	907	S	34062	Moraxella osloensis
502	241	G	469	Acinetobacter
173	173	S	28090	Acinetobacter lwoffii
32	32	S	108980	Acinetobacter ursingii
22	22	S	40215	Acinetobacter junii
19	12	S	40214	Acinetobacter johnsonii
7	7	S1	1242245	Acinetobacter johnsonii XBB1
8	8	S	40216	Acinetobacter radioresistens
6	0	G1	909768	Acinetobacter calcoaceticus/baumannii complex
5	5	S	470	Acinetobacter baumannii
1	1	S	471	Acinetobacter calcoaceticus
1	1	S	1646498	Acinetobacter sp. TTH0-4
185	29	G	338	Xanthomonas
156	150	S	339	Xanthomonas campestris
6	6	S1	340	Xanthomonas campestris pv. campestris
54	42	G	40323	Stenotrophomonas
12	0	G1	995085	Stenotrophomonas maltophilia group
12	12	S	40324	Stenotrophomonas maltophilia
3	3	G	68	Lysobacter
3	0	G	83618	Pseudoxanthomonas
3	0	S	415229	Pseudoxanthomonas spadix
3	3	S1	1045855	Pseudoxanthomonas spadix BD-a59
1	0	G	83614	Luteimonas
1	1	S	2508168	Luteimonas sp. YGD11-2
111	104	G	34037	Rahnella
7	0	S	34038	Rahnella aquatilis
7	7	S1	745277	Rahnella aquatilis CIP 78.65 = ATCC 33071
10	0	G	613	Serratia
10	10	S	618	Serratia odorifera
1	0	G	547	Enterobacter
1	0	G1	354276	Enterobacter cloacae complex
1	1	S	550	Enterobacter cloacae
19	11	G	53335	Pantoea
6	6	S	553	Pantoea ananatis
2	0	G1	1654067	Pantoea agglomerans group
2	2	S	549	Pantoea agglomerans
2	0	G	581	Morganella
2	2	S	582	Morganella morganii
18	9	G	22	Shewanella
9	9	S	1930557	Shewanella sp. FDAARGOS_354
14	0	G	469322	Steroidobacter
14	14	S	465721	Steroidobacter denitrificans
11	0	G	445	Legionella
11	11	S	452	Legionella spiritensis
6	6	G	642	Aeromonas
4	4	G	59753	Alcanivorax
4	0	G	662	Vibrio
4	0	G1	717610	Vibrio harveyi group
4	4	S	680	Vibrio campbellii
558	85	G	47420	Hydrogenophaga
469	469	S	1842537	Hydrogenophaga sp. RAC07
4	4	S	2184519	Hydrogenophaga sp. NH-16
216	15	G	52972	Polaromonas
201	201	S	296591	Polaromonas sp. JS666
57	36	G	12916	Acidovorax
12	12	S	1842533	Acidovorax sp. RAC01
7	7	S	553814	Acidovorax carolinensis
2	2	S	1858609	Acidovorax sp. T1
14	6	G	2490452	Serpentinomonas
8	8	S	1458426	Serpentinomonas mccroryi
6	0	G	665874	Limnohabitans
6	6	S	1678129	Limnohabitans sp. 103DPR2
3	1	G	34072	Variovorax
2	0	S	34073	Variovorax paradoxus
1	1	S1	543728	Variovorax paradoxus S110
1	1	S1	1246301	Variovorax paradoxus B4
348	123	G	507	Alcaligenes
225	225	S	511	Alcaligenes faecalis
47	0	G	517	Bordetella
47	47	S	463040	Bordetella genomosp. 13
24	15	G	222	Achromobacter
9	9	S	32002	Achromobacter denitrificans
3	0	G	305976	Pusillimonas
3	3	S	1007105	Pusillimonas sp. T7-7
134	80	G	32008	Burkholderia
30	15	G1	87882	Burkholderia cepacia complex
14	14	S	1503055	Burkholderia territorii
1	1	S	95486	Burkholderia cenocepacia
24	24	S	1705310	Burkholderia sp. IDO3
68	60	G	106589	Cupriavidus
5	5	S	106590	Cupriavidus necator
3	3	S	119219	Cupriavidus metallidurans
66	6	G	48736	Ralstonia
60	60	S	190721	Ralstonia insidiosa
5	0	G	149698	Massilia
5	5	S	1141883	Massilia putida
11	0	G	57479	Microvirgula
11	11	S	57480	Microvirgula aerodenitrificans
1	0	G	568394	Pseudogulbenkiania
1	1	S	748280	Pseudogulbenkiania sp. NH8B
6	0	G	551759	Aromatoleum
6	0	S	551760	Aromatoleum aromaticum
6	6	S1	76114	Aromatoleum aromaticum EbN1
212	14	G	528	Ochrobactrum
198	198	S	271865	Ochrobactrum sp. A44
22	1	G	357	Agrobacterium
21	3	G1	1183400	Agrobacterium tumefaciens complex
18	18	S	358	Agrobacterium tumefaciens
6	0	G	28105	Sinorhizobium
6	6	S	382	Sinorhizobium meliloti
18	18	G	407	Methylobacterium
11	10	G	2282523	Methylorubrum
1	1	S	408	Methylorubrum extorquens
7	0	G	85413	Bosea
7	7	S	2015316	Bosea sp. AS-1
6	6	G	374	Bradyrhizobium
4	1	G	911	Nitrobacter
3	0	S	912	Nitrobacter hamburgensis
3	3	S1	323097	Nitrobacter hamburgensis X14
5	5	G	68287	Mesorhizobium
1	1	G	31988	Aminobacter
105	80	G	165697	Sphingopyxis
20	20	S	2054227	Sphingopyxis sp. WS5A3p
5	5	S	2565556	Sphingopyxis sp. PAMC25046
8	8	G	165695	Sphingobium
130	115	G	265	Paracoccus
15	15	S	147645	Paracoccus yeei
33	0	G	125216	Roseomonas
33	33	S	2018065	Roseomonas sp. FDAARGOS_362
4	4	G	41275	Brevundimonas
36	35	G	28231	Geobacter
1	0	S	351604	Geobacter uraniireducens
1	1	S1	351605	Geobacter uraniireducens Rf4
1	0	G	39643	Sorangium
1	1	S	56	Sorangium cellulosum
14	0	G	28196	Arcobacter
14	0	S	1278212	Arcobacter suis
14	14	S1	663365	Arcobacter suis CECT 7833
9	9	G	57665	Sulfurospirillum
1	0	G	70774	Hydrogenophilus
1	1	S	297	Hydrogenophilus thermoluteolus
6698	1536	G	1279	Staphylococcus
1608	1608	S	29382	Staphylococcus cohnii
1240	1240	S	1282	Staphylococcus epidermidis
1014	1014	S	1290	Staphylococcus hominis
621	621	S	1283	Staphylococcus haemolyticus
523	523	S	2025492	Staphylococcus sp. M0911
83	83	S	29385	Staphylococcus saprophyticus
33	33	S	28035	Staphylococcus lugdunensis
22	7	S	1280	Staphylococcus aureus
15	15	S1	46170	Staphylococcus aureus subsp. aureus
10	10	S	1292	Staphylococcus warneri
7	7	S	29388	Staphylococcus capitis
1	1	S	214473	Staphylococcus nepalensis
10	0	G	227979	Jeotgalicoccus
10	10	S	1461582	Jeotgalicoccus saudimassiliensis
5	0	G	45669	Salinicoccus
5	5	S	407035	Salinicoccus halodurans
1251	806	G	1386	Bacillus
167	167	S	79880	Bacillus clausii
138	129	G1	653685	Bacillus subtilis group
8	8	S	1402	Bacillus licheniformis
1	1	S	1648923	Bacillus paralicheniformis
69	68	G1	86661	Bacillus cereus group
1	1	S	64104	Bacillus pseudomycoides
20	20	S	352858	Bacillus sp. Y1
17	17	S	561879	Bacillus safensis
8	8	S	1479	Bacillus smithii
7	7	S	1408	Bacillus pumilus
5	5	S	1581038	Bacillus sp. FJAT-22090
4	4	S	35841	Bacillus thermoamylovorans
3	3	S	86665	Bacillus halodurans
3	3	S	1565991	Bacillus sp. X1(2014)
2	2	S	450367	[Brevibacterium] frigoritolerans
1	0	S	665099	Bacillus oceanisediminis
1	1	S1	1196031	Bacillus oceanisediminis 2691
1	1	S	129985	Bacillus jeotgali
230	59	G	1329200	Fictibacillus
171	171	S	255247	Fictibacillus arsenicus
175	167	G	129337	Geobacillus
6	6	S	33940	Geobacillus thermodenitrificans
2	2	S	471223	Geobacillus sp. WCH70
26	1	G	182709	Oceanobacillus
25	0	S	746691	Oceanobacillus kimchii
25	25	S1	1238184	Oceanobacillus kimchii X50
21	0	G	1055323	Aeribacillus
21	21	S	33936	Aeribacillus pallidus
5	0	G	459532	Terribacillus
5	5	S	386490	Terribacillus goriensis
1	0	G	1906945	Parageobacillus
1	1	S	1295642	Parageobacillus genomosp. 1
730	0	G	1677050	Novibacillus
730	730	S	1471761	Novibacillus thermophilus
28	0	G	2023	Thermoactinomyces
28	28	S	2026	Thermoactinomyces vulgaris
8	0	G	292635	Laceyella
8	8	S	37482	Laceyella sacchari
269	0	G	76632	Thermobacillus
269	0	S	377615	Thermobacillus composti
269	269	S1	717605	Thermobacillus composti KWC4
34	34	G	44249	Paenibacillus
168	0	G	160795	Ureibacillus
168	168	S	51173	Ureibacillus thermosphaericus
9	0	G	648800	Solibacillus
9	9	S	76853	Solibacillus silvestris
49	4	G	1470540	Jeotgalibaca
39	39	S	2496265	Jeotgalibaca sp. H21T32
6	6	S	1903686	Jeotgalibaca sp. PTS2502
46	36	G	1301	Streptococcus
10	0	S	1349	Streptococcus uberis
10	10	S1	218495	Streptococcus uberis 0140J
20	3	G	1578	Lactobacillus
8	8	S	60520	Lactobacillus paraplantarum
4	4	S	1624	Lactobacillus salivarius
2	2	S	1610	Lactobacillus coryniformis
2	2	S	33959	Lactobacillus johnsonii
1	1	S	1589	Lactobacillus pentosus
12	5	G	1350	Enterococcus
7	7	S	1351	Enterococcus faecalis
7	0	G	46255	Weissella
7	7	S	137591	Weissella cibaria
1	1	G	1375	Aerococcus
396	0	G	2733	Symbiobacterium
396	0	S	2734	Symbiobacterium thermophilum
396	396	S1	292459	Symbiobacterium thermophilum IAM 14863
171	63	G	1485	Clostridium
107	106	S	1491	Clostridium botulinum
1	0	S1	36827	Clostridium botulinum B
1	1	S2	935198	Clostridium botulinum B str. Eklund 17B (NRP)
1	1	S	1502	Clostridium perfringens
79	79	S	2082193	Clostridiaceae bacterium 14S0207
33	0	G	2304692	Hungateiclostridium
23	10	S	1515	Hungateiclostridium thermocellum
13	13	S1	203119	Hungateiclostridium thermocellum ATCC 27405
7	7	S	1677857	Hungateiclostridium saccincola
3	0	S	288965	Hungateiclostridium clariflavum
3	3	S1	720554	Hungateiclostridium clariflavum DSM 19732
10	0	G	73918	Thermaerobacter
10	10	S	2546351	Thermaerobacter sp. FW80
1	0	S	76124	[Eubacterium] minutum
1	1	S1	888721	Eubacterium minutum ATCC 700079
9	0	G	1663717	Herbinix
9	9	S	1679721	Herbinix luporum
13	0	S	45497	[Clostridium] ultunense
13	13	S1	1288971	[Clostridium] ultunense Esp
4	0	G	191303	Turicibacter
4	4	S	1712675	Turicibacter sp. H121
259	0	G	1269	Micrococcus
259	259	S	1270	Micrococcus luteus
143	19	G	57493	Kocuria
119	119	S	71999	Kocuria palustris
5	5	S	1275	Kocuria rosea
77	8	G	1663	Arthrobacter
44	44	S	1806905	Arthrobacter sp. ZXY-2
13	13	S	290399	Arthrobacter sp. FB24
12	12	S	2079227	Arthrobacter sp. PGP41
27	3	G	1742993	Pseudarthrobacter
24	0	S	361575	Pseudarthrobacter phenanthrenivorans
24	24	S1	930171	Pseudarthrobacter phenanthrenivorans Sphe3
26	7	G	1742989	Glutamicibacter
19	0	S	256701	Glutamicibacter arilaitensis
19	19	S1	861360	Glutamicibacter arilaitensis Re117
292	73	G	1696	Brevibacterium
115	115	S	1703	Brevibacterium linens
76	76	S	2575923	Brevibacterium sp. CS2
23	23	S	273384	Brevibacterium aurantiacum
5	5	S	629680	Brevibacterium sandarakinum
9	9	G	190323	Plantibacter
7	0	G	337004	Microcella
7	7	S	279828	Microcella alkaliphila
1	0	G	235888	Salinibacterium
1	1	S	2508880	Salinibacterium sp. UTAS2018
14	14	G	43668	Brachybacterium
12	0	G	53457	Janibacter
12	12	S	857417	Janibacter indicus
3	0	G	57499	Kytococcus
3	0	S	1276	Kytococcus sedentarius
3	3	S1	478801	Kytococcus sedentarius DSM 20547
663	27	G	1912216	Cutibacterium
629	629	S	1747	Cutibacterium acnes
7	7	S	33011	Cutibacterium granulosum
7	0	G	72763	Tessaracoccus
7	7	S	1909732	Tessaracoccus sp. T2.5-30
57	2	G	1839	Nocardioides
55	55	S	110319	Nocardioides sp. CF8
109	46	G	1716	Corynebacterium
49	49	S	1705	Corynebacterium stationis
5	5	S	38302	Corynebacterium mycetoides
4	4	S	161899	Corynebacterium singulare
3	3	S	43990	Corynebacterium segmentosum
1	0	S	160386	Corynebacterium casei
1	1	S1	1285583	Corynebacterium casei LMG S-19264
1	1	S	401472	Corynebacterium ureicelerivorans
64	0	G	1866885	Mycolicibacterium
35	0	S	46351	Mycolicibacterium hassiacum
35	35	S1	1122247	Mycolicibacterium hassiacum DSM 44199
14	14	S	1804	Mycolicibacterium gilvum
9	9	S	1792	Mycolicibacterium chitae
5	5	S	1797	Mycolicibacterium thermoresistibile
1	0	S	36814	Mycolicibacterium rhodesiae
1	1	S1	710685	Mycolicibacterium rhodesiae NBB3
36	0	G	1763	Mycobacterium
36	36	S	1682113	Mycobacterium sp. YC-RL4
76	67	G	1827	Rhodococcus
9	9	S	1653479	Rhodococcus sp. PBTS 2
5	0	G	2053	Gordonia
4	4	S	2055	Gordonia terrae
1	0	S	2054	Gordonia bronchialis
1	1	S1	526226	Gordonia bronchialis DSM 43247
3	3	G	37914	Dietzia
166	0	G	147067	Thermobispora
166	0	S	2006	Thermobispora bispora
166	166	S1	469371	Thermobispora bispora DSM 43833
152	14	G	1851	Saccharomonospora
103	0	S	1852	Saccharomonospora viridis
103	103	S1	471857	Saccharomonospora viridis DSM 43017
16	0	S	40988	Saccharomonospora azurea
16	16	S1	882081	Saccharomonospora azurea NA-128
15	0	S	40990	Saccharomonospora glauca
15	15	S1	928724	Saccharomonospora glauca K62
4	0	S	40989	Saccharomonospora cyanea
4	4	S1	882082	Saccharomonospora cyanea NA-134
73	0	G	83677	Thermobifida
73	0	S	2021	Thermobifida fusca
73	73	S1	269800	Thermobifida fusca YX
5	0	G	2013	Nocardiopsis
5	0	S	53437	Nocardiopsis alba
5	5	S1	1205910	Nocardiopsis alba ATCC BAA-2165
41	0	G	2019	Thermomonospora
41	0	S	2020	Thermomonospora curvata
41	41	S1	471852	Thermomonospora curvata DSM 43183
27	24	G	1883	Streptomyces
3	3	S	54571	Streptomyces venezuelae
10	10	G	1873	Micromonospora
1	0	G	84593	Verrucosispora
1	0	S	1003110	Verrucosispora maris
1	1	S1	263358	Verrucosispora maris AB-18-032
2	2	G	1654	Actinomyces
234	189	G	270	Thermus
45	45	S	274	Thermus thermophilus
1	0	G	2056	Sphaerobacter
1	0	S	2057	Sphaerobacter thermophilus
1	1	S1	479434	Sphaerobacter thermophilus DSM 20745
39	3	G	28453	Sphingobacterium
36	36	S	1538644	Sphingobacterium sp. ML3W
17	6	G	76831	Myroides
11	0	S	256	Myroides odoratus
11	11	S1	929704	Myroides odoratus DSM 2801
7	7	G	89966	Hymenobacter
2	2	G	1379908	Rufibacter
1	0	G	105	Runella
1	1	S	2259595	Runella sp. HYN0085
7	0	G	838	Prevotella
7	0	S	652716	Prevotella sp. oral taxon 299
7	7	S1	575614	Prevotella sp. oral taxon 299 str. F0039
18	0	G	332162	Candidatus Solibacter
18	0	S	332163	Candidatus Solibacter usitatus
18	18	S1	234267	Candidatus Solibacter usitatus Ellin6076
18	18	G	1234	Nitrospira
9	0	G	157	Treponema
9	9	S	158	Treponema denticola
Tot G=144 Tot S=237
*A rank code, indicating (U)nclassified, (D)omain, (K)ingdom, (P)hylum, (C)lass, (O)rder, (F)amily, (G)enus, or (S)pecies. All other ranks are simply filled with a dash.

## Sheet: T21_virus
Number of reads covered by the clade rooted at this taxon	Number of reads assigned directly to this taxon	Rank code*	NCBI taxonomy ID	Indented scientific name
184	0	S	45617	Human endogenous retrovirus K
184	184	S1	166122	Human endogenous retrovirus K113
52	0	G	1921122	Nonanavirus
52	0	G1	2315205	unclassified Nonanavirus
52	52	S	1969841	Proteus phage VB_PmiS-Isfahan
23	0	G	2169655	Pulverervirus
23	0	G1	2340861	unclassified Pulverervirus
23	23	S	1838138	Propionibacterium phage PFR2
5	0	G	680116	Spbetavirus
5	0	G1	1732062	unclassified Spbetalikevirus
5	5	S	1732063	Staphylococcus phage SPbeta-like
4	4	G	1982251	Pahexavirus
2	2	G	2560094	Asteriusvirus
1	1	G	1913650	Karamvirus
2	0	S	2560335	Bacillus virus SIOphi
2	2	S1	1285382	Bacillus phage SIOphi
1	0	G	1805626	Pithovirus
1	1	S	1450746	Pithovirus sibericum
Tot G=10 Tot S=8
*A rank code, indicating (U)nclassified, (D)omain, (K)ingdom, (P)hylum, (C)lass, (O)rder, (F)amily, (G)enus, or (S)pecies. All other ranks are simply filled with a dash.

## Sheet: T21_femur_virus
Number of reads covered by the clade rooted at this taxon	Number of reads assigned directly to this taxon	Rank code*	NCBI taxonomy ID	Indented scientific name
45	0	G	680116	Spbetavirus
45	0	G1	1732062	unclassified Spbetalikevirus
45	45	S	1732063	Staphylococcus phage SPbeta-like
4	0	G	2169655	Pulverervirus
4	0	G1	2340861	unclassified Pulverervirus
4	4	S	1838138	Propionibacterium phage PFR2
1	0	S	45617	Human endogenous retrovirus K
1	1	S1	166122	Human endogenous retrovirus K113
Tot G=4 Tot S=4
*A rank code, indicating (U)nclassified, (D)omain, (K)ingdom, (P)hylum, (C)lass, (O)rder, (F)amily, (G)enus, or (S)pecies. All other ranks are simply filled with a dash.

## Sheet: T21_protozoa
Number of reads covered by the clade rooted at this taxon	Number of reads assigned directly to this taxon	Rank code*	NCBI taxonomy ID	Indented scientific name
32451	0	G	5810	Toxoplasma
32451	0	S	5811	Toxoplasma gondii
32451	32451	S1	508771	Toxoplasma gondii ME49
255	2	G	5820	Plasmodium
226	0	G1	418103	Plasmodium (Plasmodium)
226	226	S	5855	Plasmodium vivax
27	27	S	208452	Plasmodium coatneyi
1	0	G	5658	Leishmania
1	0	G1	38568	Leishmania
1	0	G2	38582	Leishmania mexicana species complex
1	0	S	5665	Leishmania mexicana
1	1	S1	929439	Leishmania mexicana MHOM/GT/2001/U1103
Tot G=6 Tot S=6
*A rank code, indicating (U)nclassified, (D)omain, (K)ingdom, (P)hylum, (C)lass, (O)rder, (F)amily, (G)enus, or (S)pecies. All other ranks are simply filled with a dash.

## Sheet: T21_femur_protozoa
Number of reads covered by the clade rooted at this taxon	Number of reads assigned directly to this taxon	Rank code*	NCBI taxonomy ID	Indented scientific name
197	0	G	5810	Toxoplasma
197	0	S	5811	Toxoplasma gondii
197	197	S1	508771	Toxoplasma gondii ME49
51	10	G	5820	Plasmodium
41	41	S	208452	Plasmodium coatneyi
21	0	G	5864	Babesia
21	21	S	5866	Babesia bigemina
Tot G=3 Tot S=4
*A rank code, indicating (U)nclassified, (D)omain, (K)ingdom, (P)hylum, (C)lass, (O)rder, (F)amily, (G)enus, or (S)pecies. All other ranks are simply filled with a dash.
