# Supplementary material for: First Glimpse into the Genomic Characterization of People from the Imperial Roman Community of Casal Bertone (Rome, First–Third Centuries AD)
Source: Genes (Basel). 2022 Jan 13;13(1):136. doi: 10.3390/genes13010136 (PMC8774527; doi:10.3390/genes13010136)
Supplement: Supplementary file 1 [file genes-13-00136-s001.zip › Supplementary Table S4.xlsx]

## Sheet: T46_bacteria
Supplementary Table S4: Microbial findings for T46.
Number of reads covered by the clade rooted at this taxon	Number of reads assigned directly to this taxon	Rank code*	NCBI taxonomy ID	Indented scientific name
14583	13362	G	1873	Micromonospora
429	304	S	47850	Micromonospora aurantiaca
125	125	S1	644283	Micromonospora aurantiaca ATCC 27029
251	251	S	47857	Micromonospora echinaurantiaca
239	239	S	47872	Micromonospora purpureochromogenes
63	63	S	2201999	Micromonospora sp. B006
54	54	S	648999	Micromonospora sp. L5
49	49	S	356852	Micromonospora coxensis
40	40	S	47858	Micromonospora echinofusca
28	28	S	479978	Micromonospora tulbaghiae
23	23	S	1877	Micromonospora echinospora
19	19	S	47865	Micromonospora inositola
8	8	S	285665	Micromonospora coriariae
6	6	S	1881	Micromonospora viridifaciens
6	6	S	356851	Micromonospora chokoriensis
3	3	S	299146	Micromonospora narathiwatensis
1	1	S	299152	Micromonospora siamensis
1	1	S	291594	Micromonospora rifamycinica
1	1	S	2039870	Micromonospora sp. WMMA2032
4	0	G	84593	Verrucosispora
4	0	S	1003110	Verrucosispora maris
4	4	S1	263358	Verrucosispora maris AB-18-032
3	0	G	168694	Salinispora
3	0	S	168695	Salinispora tropica
3	3	S1	369723	Salinispora tropica CNB-440
2	0	G	673534	Plantactinospora
2	2	S	2024580	Plantactinospora sp. KBS50
1	0	G	1865	Actinoplanes
1	1	S	113562	Actinoplanes derwentensis
3407	3250	G	1883	Streptomyces
42	42	S	2211357	Streptomyces sp. ETH9427
31	31	S	2135430	Streptomyces sp. P3
30	30	S	1827580	Streptomyces nigra
20	20	S	1751294	Streptomyces sp. 4F
7	7	S	2109593	Streptomyces sp. SGAir0924
5	0	S	379067	Streptomyces bingchenggensis
5	5	S1	749414	Streptomyces bingchenggensis BCW-1
4	4	S	68203	Streptomyces fungicidicus
4	4	S	38300	Streptomyces pristinaespiralis
3	1	G1	629295	Streptomyces griseus group
2	0	G2	1482558	Streptomyces albovinaceus subgroup
2	2	S	1908	Streptomyces globisporus
3	0	G1	1477431	Streptomyces albidoflavus group
3	3	S	1886	Streptomyces albidoflavus
2	2	S	1561022	Streptomyces sp. CCM_MD2014
2	2	S	2184053	Streptomyces sp. ZFG47
1	1	S	2563602	Streptomyces sp. SS52
1	1	S	1841249	Streptomyces sp. RTd22
1	1	S	1725411	Streptomyces sp. CdTB01
1	1	S	2203204	Streptomyces sp. WAC 01438
1	0	G	2063	Kitasatospora
1	1	S	68173	Kitasatospora albolonga
1021	30	G	1912216	Cutibacterium
990	990	S	1747	Cutibacterium acnes
1	1	S	33010	Cutibacterium avidum
1	0	G	72763	Tessaracoccus
1	1	S	399497	Tessaracoccus flavescens
37	14	G	1839	Nocardioides
11	0	S	450734	Nocardioides dokdonensis
11	11	S1	1300347	Nocardioides dokdonensis FR1436
4	4	S	110319	Nocardioides sp. CF8
4	4	S	196162	Nocardioides sp. JS614
2	2	S	2500546	Nocardioides sp. HY056
1	1	S	2518370	Nocardioides sp. MMS17-SY117
1	1	S	2518371	Nocardioides sp. MMS17-SY207-3
2	2	G	2040	Aeromicrobium
1	0	G	86795	Marmoricola
1	1	S	642780	Marmoricola scoriae
230	216	G	1827	Rhodococcus
7	7	S	1833	Rhodococcus erythropolis
3	3	S	2490853	Rhodococcus sp. NJ-530
3	3	S	1805827	Rhodococcus sp. MTM3W5.2
1	1	S	43767	Rhodococcus hoagii
7	1	G	1817	Nocardia
3	3	S	1824	Nocardia asteroides
3	3	S	37329	Nocardia farcinica
124	25	G	1866885	Mycolicibacterium
37	0	S	46351	Mycolicibacterium hassiacum
37	37	S1	1122247	Mycolicibacterium hassiacum DSM 44199
28	28	S	1797	Mycolicibacterium thermoresistibile
14	9	S	1804	Mycolicibacterium gilvum
4	4	S1	278137	Mycolicibacterium gilvum Spyr1
1	1	S1	350054	Mycolicibacterium gilvum PYR-GCK
8	8	S	1772	Mycolicibacterium smegmatis
5	5	S	1792	Mycolicibacterium chitae
4	0	S	36814	Mycolicibacterium rhodesiae
4	4	S1	710685	Mycolicibacterium rhodesiae NBB3
3	0	S	1810	Mycolicibacterium vaccae
3	3	S1	1354275	Mycolicibacterium vaccae 95051
20	4	G	1763	Mycobacterium
13	13	S	1879023	Mycobacterium sp. djl-10
3	3	S	1682113	Mycobacterium sp. YC-RL4
3	0	G	1073531	Mycolicibacter
3	3	S	875328	Mycolicibacter sinensis
203	140	G	1716	Corynebacterium
32	32	S	1705	Corynebacterium stationis
17	17	S	1718	Corynebacterium glutamicum
10	0	S	160386	Corynebacterium casei
10	10	S1	1285583	Corynebacterium casei LMG S-19264
2	2	S	43990	Corynebacterium segmentosum
1	1	S	43770	Corynebacterium striatum
1	0	S	1727	Corynebacterium variabile
1	1	S1	858619	Corynebacterium variabile DSM 44702
4	0	G	37914	Dietzia
2	2	S	546160	Dietzia lutea
1	1	S	139021	Dietzia psychralcaliphila
1	1	S	712270	Dietzia sp. oral taxon 368
3	1	G	2053	Gordonia
2	2	S	1136941	Gordonia phthalatica
135	8	G	1742989	Glutamicibacter
125	0	S	256701	Glutamicibacter arilaitensis
125	125	S1	861360	Glutamicibacter arilaitensis Re117
2	2	S	37929	Glutamicibacter nicotianae
24	0	G	1269	Micrococcus
24	24	S	1270	Micrococcus luteus
24	2	G	1663	Arthrobacter
9	9	S	37928	Arthrobacter crystallopoietes
7	7	S	2079227	Arthrobacter sp. PGP41
5	5	S	656366	Arthrobacter alpinus
1	1	S	1652545	Arthrobacter sp. YC-RL1
23	4	G	57493	Kocuria
18	18	S	1275	Kocuria rosea
1	1	S	71999	Kocuria palustris
1	0	G	32207	Rothia
1	1	S	43675	Rothia mucilaginosa
1	0	G	1868332	Neomicrococcus
1	1	S	556325	Neomicrococcus aestuarii
69	10	G	33882	Microbacterium
31	31	S	1714373	Microbacterium sp. No. 7
10	10	S	2268461	Microbacterium sp. ABRD_28
8	8	S	904291	Microbacterium sediminis
2	2	S	36805	Microbacterium aurum
2	2	S	104336	Microbacterium foliorum
2	2	S	2483401	Microbacterium sp. 10M-3C3
2	2	S	912630	Microbacterium sp. LKL04
1	1	S	84292	Microbacterium chocolatum
1	1	S	2048898	Microbacterium sp. Y-01
19	0	G	337004	Microcella
19	19	S	279828	Microcella alkaliphila
8	0	G	55968	Leucobacter
8	8	S	1784719	Leucobacter triazinivorans
5	0	G	235888	Salinibacterium
5	5	S	2508880	Salinibacterium sp. UTAS2018
1	1	G	33877	Agromyces
74	28	G	1696	Brevibacterium
24	24	S	629680	Brevibacterium sandarakinum
20	20	S	273384	Brevibacterium aurantiacum
2	2	S	1703	Brevibacterium linens
20	19	G	157920	Cellulosimicrobium
1	1	S	1710	Cellulosimicrobium cellulans
13	7	G	43668	Brachybacterium
5	0	S	43669	Brachybacterium faecium
5	5	S1	446465	Brachybacterium faecium DSM 4810
1	1	S	1903186	Brachybacterium sp. P6-10-X1
5	0	G	57499	Kytococcus
5	0	S	1276	Kytococcus sedentarius
5	5	S1	478801	Kytococcus sedentarius DSM 20547
5	0	G	60919	Sanguibacter
5	0	S	60920	Sanguibacter keddieii
5	5	S1	446469	Sanguibacter keddieii DSM 10542
4	0	G	43673	Jonesia
4	4	S	43674	Jonesia denitrificans
3	0	G	1707	Cellulomonas
3	0	S	11	Cellulomonas gilvus
3	3	S1	593907	Cellulomonas gilvus ATCC 13127
1	0	G	53457	Janibacter
1	1	S	857417	Janibacter indicus
1	0	G	125287	Ornithinimicrobium
1	1	S	1288636	Ornithinimicrobium flavum
148	8	G	1851	Saccharomonospora
121	0	S	1852	Saccharomonospora viridis
121	121	S1	471857	Saccharomonospora viridis DSM 43017
13	0	S	40990	Saccharomonospora glauca
13	13	S1	928724	Saccharomonospora glauca K62
6	0	S	40988	Saccharomonospora azurea
6	6	S1	882081	Saccharomonospora azurea NA-128
120	5	G	1847	Pseudonocardia
110	110	S	2074	Pseudonocardia autotrophica
5	0	S	240495	Pseudonocardia dioxanivorans
5	5	S1	675635	Pseudonocardia dioxanivorans CB1190
156	126	G	2000	Streptosporangium
27	0	S	2001	Streptosporangium roseum
27	27	S1	479432	Streptosporangium roseum DSM 43021
3	3	S	2202249	Streptosporangium sp. 'caverna'
4	0	G	83681	Nonomuraea
4	4	S	1909395	Nonomuraea sp. ATCC 55076
49	0	G	83677	Thermobifida
49	0	S	2021	Thermobifida fusca
49	49	S1	269800	Thermobifida fusca YX
1	0	G	2013	Nocardiopsis
1	1	S	2014	Nocardiopsis dassonvillei
4	0	G	2019	Thermomonospora
4	0	S	2020	Thermomonospora curvata
4	4	S1	471852	Thermomonospora curvata DSM 43183
53	0	G	147067	Thermobispora
53	0	S	2006	Thermobispora bispora
53	53	S1	469371	Thermobispora bispora DSM 43833
39	2	G	1678	Bifidobacterium
35	32	S	1683	Bifidobacterium angulatum
3	3	S1	518635	Bifidobacterium angulatum DSM 20098 = JCM 7096
2	2	S	1686	Bifidobacterium catenulatum
1	0	G	2701	Gardnerella
1	1	S	2702	Gardnerella vaginalis
4	0	G	1860	Geodermatophilus
4	0	S	1861	Geodermatophilus obscurus
4	4	S1	526225	Geodermatophilus obscurus DSM 43160
2	0	G	38501	Blastococcus
2	0	S	138336	Blastococcus saxobsidens
2	2	S1	1146883	Blastococcus saxobsidens DD2
1	0	G	1854	Frankia
1	1	S	298653	Frankia sp. EAN1pec
11	0	G	102106	Collinsella
11	11	S	74426	Collinsella aerofaciens
1	0	G	191494	Conexibacter
1	0	S	191495	Conexibacter woesei
1	1	S1	469383	Conexibacter woesei DSM 14684
7088	5943	G	129337	Geobacillus
651	651	S	471223	Geobacillus sp. WCH70
380	315	S	33940	Geobacillus thermodenitrificans
65	65	S1	420246	Geobacillus thermodenitrificans NG80-2
83	8	G1	1505648	Geobacillus thermoleovorans group
53	53	S	33941	Geobacillus thermoleovorans
13	13	S	169283	Geobacillus lituanicus
5	5	S	1394	[Bacillus] caldolyticus
4	4	S	33938	Geobacillus thermocatenulatus
20	20	S	581103	Geobacillus sp. Y4.1MC1
4	4	S	1422	Geobacillus stearothermophilus
2	2	S	129338	Geobacillus subterraneus
2	2	S	691437	Geobacillus sp. C56-T3
2	2	S	1921421	Geobacillus genomosp. 3
1	1	S	1233873	Geobacillus sp. GHH01
6515	1804	G	1329200	Fictibacillus
4711	4711	S	255247	Fictibacillus arsenicus
3153	819	G	1386	Bacillus
883	0	S	665099	Bacillus oceanisediminis
883	883	S1	1196031	Bacillus oceanisediminis 2691
736	736	S	1565991	Bacillus sp. X1(2014)
213	213	S	352858	Bacillus sp. Y1
149	149	S	79880	Bacillus clausii
71	44	G1	86661	Bacillus cereus group
12	4	S	1396	Bacillus cereus
5	5	S1	526983	Bacillus cereus Rock3-28
2	2	S1	526986	Bacillus cereus Rock3-44
1	1	S1	526984	Bacillus cereus Rock3-29
12	3	S	1428	Bacillus thuringiensis
7	0	S1	180854	Bacillus thuringiensis serovar huazhongensis
7	7	S2	527030	Bacillus thuringiensis serovar huazhongensis BGSC 4BD1
1	0	S1	180877	Bacillus thuringiensis serovar pulsiensis
1	1	S2	527028	Bacillus thuringiensis serovar pulsiensis BGSC 4CC1
1	1	S1	1423143	Bacillus thuringiensis Bt18247
2	2	S	1405	Bacillus mycoides
1	1	S	64104	Bacillus pseudomycoides
50	50	S	1215031	Bacillus thermocopriae
41	33	G1	653685	Bacillus subtilis group
8	8	S	1402	Bacillus licheniformis
28	28	S	450367	[Brevibacterium] frigoritolerans
28	28	S	1479	Bacillus smithii
25	25	S	129985	Bacillus jeotgali
24	24	S	35841	Bacillus thermoamylovorans
15	15	S	86664	Bacillus flexus
12	5	S	1478	Bacillus simplex
7	7	S1	1349754	Bacillus simplex NBRC 15720 = DSM 1321
12	12	S	228899	Bacillus asahii
11	11	S	1408	Bacillus pumilus
5	5	S	561879	Bacillus safensis
5	0	S	79885	Bacillus pseudofirmus
5	5	S1	398511	Bacillus pseudofirmus OF4
4	0	S	1471	Bacillus methanolicus
4	4	S1	796606	Bacillus methanolicus MGA3
3	3	S	152268	Bacillus litoralis
3	0	S	86665	Bacillus halodurans
3	3	S1	272558	Bacillus halodurans C-125
3	3	S	1705566	Bacillus sp. FJAT-18017
3	3	S	33932	Bacillus cohnii
3	3	S	1581038	Bacillus sp. FJAT-22090
3	3	S	1404	Bacillus megaterium
1	1	S	1193713	Bacillus mesonae
1	1	S	859143	Bacillus kochii
1	0	S	300825	Bacillus lehensis
1	1	S1	1246626	Bacillus lehensis G1
1	1	S	421767	Bacillus butanolivorans
590	9	G	1906945	Parageobacillus
451	451	S	1295642	Parageobacillus genomosp. 1
130	88	S	1426	Parageobacillus thermoglucosidasius
30	30	S1	634956	Parageobacillus thermoglucosidasius C56-YS93
12	12	S1	1136178	Parageobacillus thermoglucosidasius TNO-09.020
313	0	G	1055323	Aeribacillus
313	313	S	33936	Aeribacillus pallidus
163	111	G	150247	Anoxybacillus
34	34	S	198467	Anoxybacillus gonensis
15	7	S	33934	Anoxybacillus flavithermus
8	8	S1	491915	Anoxybacillus flavithermus WK1
3	3	S	294699	Anoxybacillus amylolyticus
121	3	G	400634	Lysinibacillus
116	116	S	2169540	Lysinibacillus sp. 2017
2	2	S	2072025	Lysinibacillus sp. YS11
6	0	G	459532	Terribacillus
6	6	S	386490	Terribacillus goriensis
3	0	G	182709	Oceanobacillus
3	0	S	746691	Oceanobacillus kimchii
3	3	S1	1238184	Oceanobacillus kimchii X50
2	1	G	84406	Virgibacillus
1	1	S	1482	Virgibacillus halodenitrificans
1259	0	G	1677050	Novibacillus
1259	1259	S	1471761	Novibacillus thermophilus
157	0	G	2023	Thermoactinomyces
157	157	S	2026	Thermoactinomyces vulgaris
116	0	G	292635	Laceyella
116	116	S	37482	Laceyella sacchari
86	86	S	2490858	Thermoactinomycetaceae bacterium SCSIO 07575
381	64	G	44249	Paenibacillus
273	273	S	1695218	Paenibacillus sp. 32O-W
12	12	S	169760	Paenibacillus stellifer
9	9	S	59843	Paenibacillus glucanolyticus
7	7	S	481743	Paenibacillus sp. Y412MC10
6	6	S	528191	Paenibacillus xylanexedens
4	4	S	189426	Paenibacillus odorifer
2	2	S	1401	Paenibacillus lautus
2	2	S	2211212	Paenibacillus sp. DCT19
1	1	S	44251	Paenibacillus durus
1	1	S	162209	Paenibacillus naphthalenovorans
270	0	G	76632	Thermobacillus
270	0	S	377615	Thermobacillus composti
270	270	S1	717605	Thermobacillus composti KWC4
107	42	G	55080	Brevibacillus
22	22	S	1393	Brevibacillus brevis
18	18	S	1465	Brevibacillus laterosporus
13	13	S	2496837	Brevibacillus sp. SCSIO 07484
12	12	S	51101	Brevibacillus agri
61	0	G	55079	Aneurinibacillus
61	61	S	1450761	Aneurinibacillus sp. XH2
2	1	G	329857	Cohnella
1	1	S	2480923	Cohnella sp. 18JY8-7
651	0	G	160795	Ureibacillus
651	651	S	51173	Ureibacillus thermosphaericus
57	2	G	648800	Solibacillus
55	48	S	76853	Solibacillus silvestris
7	7	S1	1002809	Solibacillus silvestris StLB046
9	0	G	1569	Sporosarcina
8	8	S	1571	Sporosarcina ureae
1	1	S	1476	Sporosarcina psychrophila
2	2	G	1372	Planococcus
2	0	G	1649	Kurthia
2	2	S	1750719	Kurthia sp. 11kri321
589	256	G	1279	Staphylococcus
214	214	S	1280	Staphylococcus aureus
41	41	S	1290	Staphylococcus hominis
18	18	S	1282	Staphylococcus epidermidis
16	16	S	1296	Staphylococcus sciuri
12	12	S	1288	Staphylococcus xylosus
11	11	S	29385	Staphylococcus saprophyticus
8	8	S	246432	Staphylococcus equorum
5	5	S	214473	Staphylococcus nepalensis
4	4	S	29388	Staphylococcus capitis
3	3	S	29382	Staphylococcus cohnii
1	1	S	1283	Staphylococcus haemolyticus
6	0	G	45669	Salinicoccus
6	6	S	407035	Salinicoccus halodurans
3	0	G	227979	Jeotgalicoccus
3	3	S	1461582	Jeotgalicoccus saudimassiliensis
3	3	G	33986	Exiguobacterium
1	0	G	1637	Listeria
1	1	S	1639	Listeria monocytogenes
107	99	G	1301	Streptococcus
3	3	S	1302	Streptococcus gordonii
1	1	S	197614	Streptococcus pasteurianus
1	1	S	1305	Streptococcus sanguinis
1	1	S	28037	Streptococcus mitis
1	1	S	1313	Streptococcus pneumoniae
1	1	S	1316408	Streptococcus sp. HSISM1
10	0	G	1357	Lactococcus
5	0	S	1358	Lactococcus lactis
5	5	S1	1359	Lactococcus lactis subsp. cremoris
5	5	S	1363	Lactococcus garvieae
90	2	G	1470540	Jeotgalibaca
86	86	S	2496265	Jeotgalibaca sp. H21T32
2	2	S	708126	Jeotgalibaca dankookensis
2	0	G	2747	Carnobacterium
2	0	S	147709	Carnobacterium inhibens
2	2	S1	1266845	Carnobacterium inhibens subsp. gilichinskyi
1	0	G	191769	Marinilactibacillus
1	1	S	1911586	Marinilactibacillus sp. 15R
62	43	G	1375	Aerococcus
14	14	S	51665	Aerococcus urinaeequi
5	5	S	1377	Aerococcus viridans
29	7	G	1350	Enterococcus
17	17	S	1352	Enterococcus faecium
4	4	S	1351	Enterococcus faecalis
1	1	S	1354	Enterococcus hirae
1	1	G	51668	Tetragenococcus
17	5	G	1578	Lactobacillus
5	5	S	47770	Lactobacillus crispatus
4	0	S	1623	Lactobacillus ruminis
4	4	S1	1069534	Lactobacillus ruminis ATCC 27782
1	1	S	1604	Lactobacillus amylovorus
1	1	S	1624	Lactobacillus salivarius
1	1	S	303541	Lactobacillus apis
3	0	G	1253	Pediococcus
3	3	S	1255	Pediococcus pentosaceus
15	15	G	1243	Leuconostoc
5	3	G	46255	Weissella
1	1	S	1583	Weissella confusa
1	1	S	137591	Weissella cibaria
2015	575	G	1485	Clostridium
1346	1244	S	1491	Clostridium botulinum
72	72	S1	1415774	Clostridium botulinum 202F
30	0	S1	36827	Clostridium botulinum B
30	30	S2	935198	Clostridium botulinum B str. Eklund 17B (NRP)
46	46	S	1502	Clostridium perfringens
33	33	S	1561	Clostridium baratii
6	6	S	1492	Clostridium butyricum
3	3	S	1509	Clostridium sporogenes
2	2	S	182773	Clostridium isatidis
1	0	S	1501	Clostridium pasteurianum
1	1	S1	86416	Clostridium pasteurianum BC1
1	1	S	1504	Clostridium septicum
1	1	S	394958	Clostridium taeniosporum
1	1	S	1542	Clostridium novyi
339	0	G	2733	Symbiobacterium
339	0	S	2734	Symbiobacterium thermophilum
339	339	S1	292459	Symbiobacterium thermophilum IAM 14863
16	0	G	1663717	Herbinix
16	16	S	1679721	Herbinix luporum
8	3	G	1506553	Lachnoclostridium
5	0	S	29370	[Clostridium] sphenoides
5	5	S1	1297793	[Clostridium] sphenoides JCM 1415
2	0	G	572511	Blautia
1	1	S	33035	Blautia producta
1	1	S	2479767	Blautia sp. SC05B48
2	0	G	2569097	Anaerobutyricum
2	2	S	39488	Anaerobutyricum hallii
14	2	G	2304692	Hungateiclostridium
7	0	S	288965	Hungateiclostridium clariflavum
7	7	S1	720554	Hungateiclostridium clariflavum DSM 19732
5	5	S	1677857	Hungateiclostridium saccincola
3	0	G	2304693	Pseudoclostridium
3	3	S	84032	Pseudoclostridium thermosuccinogenes
2	0	G	2304691	Thermoclostridium
2	1	S	1510	Thermoclostridium stercorarium
1	0	S1	160385	Thermoclostridium stercorarium subsp. leptospartum
1	1	S2	1346611	Thermoclostridium stercorarium subsp. leptospartum DSM 9219
12	0	G	79206	Desulfosporosinus
8	0	S	339862	Desulfosporosinus youngiae
8	8	S1	768710	Desulfosporosinus youngiae DSM 17734
4	0	S	79209	Desulfosporosinus meridiei
4	4	S1	768704	Desulfosporosinus meridiei DSM 13257
2	0	G	1562	Desulfotomaculum
2	2	S	1833852	Desulfotomaculum ferrireducens
1	1	G	56112	Dehalobacter
11	3	G	73918	Thermaerobacter
8	8	S	2546351	Thermaerobacter sp. FW80
3	0	G	1849828	Paeniclostridium
3	3	S	1505	Paeniclostridium sordellii
3	3	S	29343	[Clostridium] cellulosi
4	0	G	499228	Tepidanaerobacter
4	0	S	499229	Tepidanaerobacter acetatoxydans
4	4	S1	1209989	Tepidanaerobacter acetatoxydans Re1
3	0	G	140458	Thermacetogenium
3	0	S	85874	Thermacetogenium phaeum
3	3	S1	1089553	Thermacetogenium phaeum DSM 12270
43	0	G	191303	Turicibacter
43	43	S	1712675	Turicibacter sp. H121
11	0	G	165812	Sporanaerobacter
11	11	S	2507161	Sporanaerobacter sp. NJN-17
9	0	S	45497	[Clostridium] ultunense
9	9	S1	1288971	[Clostridium] ultunense Esp
13	1	G	365348	Pelosinus
12	0	S	365349	Pelosinus fermentans
12	12	S1	1192197	Pelosinus fermentans JBW45
429	339	G	270	Thermus
52	49	S	274	Thermus thermophilus
3	3	S1	798128	Thermus thermophilus JL-18
17	0	S	37636	Thermus scotoductus
17	17	S1	743525	Thermus scotoductus SA-01
11	11	S	456163	Thermus parvatiensis
5	5	S	56956	Thermus brockianus
3	3	S	2483360	Thermus sp. YIM 78456
2	0	S	271	Thermus aquaticus
2	2	S1	498848	Thermus aquaticus Y51MC23
85	4	G	1129	Synechococcus
81	81	S	1827144	Synechococcus sp. NIES-970
3	0	G	47251	Leptolyngbya
3	3	S	1080068	Leptolyngbya sp. O-77
5	3	G	1177	Nostoc
2	0	S	92942	Nostoc linckia
2	2	S1	1091006	Nostoc linckia NIES-25
2	0	G	264688	Trichormus
2	0	S	264691	Trichormus variabilis
2	2	S1	1973479	Trichormus variabilis NIES-23
1	0	G	110103	Anabaenopsis
1	0	S	109266	Anabaenopsis circularis
1	1	S1	1085406	Anabaenopsis circularis NIES-21
10	0	G	63132	Geitlerinema
10	10	S	1173025	Geitlerinema sp. PCC 7407
8	0	G	1158	Oscillatoria
8	0	S	482564	Oscillatoria nigro-viridis
8	8	S1	179408	Oscillatoria nigro-viridis PCC 7112
2	0	G	76023	Halothece
2	2	S	65093	Halothece sp. PCC 7418
1	1	G	1125	Microcystis
2	0	G	54298	Chroococcidiopsis
2	0	S	54299	Chroococcidiopsis thermalis
2	2	S1	251229	Chroococcidiopsis thermalis PCC 7203
106	0	G	2056	Sphaerobacter
106	0	S	2057	Sphaerobacter thermophilus
106	106	S1	479434	Sphaerobacter thermophilus DSM 20745
24481	10458	G	286	Pseudomonas
11033	222	G1	136846	Pseudomonas stutzeri group
10806	0	G2	578833	Pseudomonas stutzeri subgroup
10806	1078	S	316	Pseudomonas stutzeri
9684	9684	S1	1123519	Pseudomonas stutzeri DSM 10701
25	25	S1	644801	Pseudomonas stutzeri RCH2
19	19	S1	1196835	Pseudomonas stutzeri CCUG 29243
5	5	S	271420	Pseudomonas xanthomarina
693	693	S	2083054	Pseudomonas sp. LG1D9
653	653	S	2320270	Pseudomonas sp. DG56-2
493	493	S	797277	Pseudomonas litoralis
454	2	G1	136842	Pseudomonas chlororaphis group
435	435	S	47884	Pseudomonas taetrolens
11	10	S	587753	Pseudomonas chlororaphis
1	1	S1	587851	Pseudomonas chlororaphis subsp. aureofaciens
6	6	S	296	Pseudomonas fragi
357	1	G1	136841	Pseudomonas aeruginosa group
347	347	S	287	Pseudomonas aeruginosa
5	1	S	300	Pseudomonas mendocina
4	4	S1	1225174	Pseudomonas mendocina S5.2
2	2	S	43263	Pseudomonas alcaligenes
2	0	G2	1232139	Pseudomonas oleovorans/pseudoalcaligenes group
2	2	S	301	Pseudomonas oleovorans
189	16	G1	136843	Pseudomonas fluorescens group
110	110	S	294	Pseudomonas fluorescens
24	24	S	129817	Pseudomonas brenneri
18	18	S	76760	Pseudomonas rhodesiae
8	8	S	47883	Pseudomonas synxantha
5	5	S	76761	Pseudomonas veronii
4	4	S	46679	Pseudomonas mucidolens
4	4	S	200450	Pseudomonas trivialis
46	0	S	101564	Pseudomonas alcaliphila
46	46	S1	741155	Pseudomonas alcaliphila JAB1
39	7	G1	136845	Pseudomonas putida group
31	22	S	303	Pseudomonas putida
4	4	S1	76869	Pseudomonas putida GB-1
3	3	S1	1081940	Pseudomonas putida B6-2
1	1	S1	390235	Pseudomonas putida W619
1	1	S1	1211579	Pseudomonas putida NBRC 14164
1	0	S	47880	Pseudomonas fulva
1	1	S1	743720	Pseudomonas fulva 12-X
13	13	S	1499686	Pseudomonas saudiphocaensis
11	11	S	930166	Pseudomonas brassicacearum
8	8	S	150396	Pseudomonas sp. MT-1
6	6	S	198620	Pseudomonas koreensis
4	2	G1	136849	Pseudomonas syringae group
2	0	G2	251695	Pseudomonas syringae group genomosp. 1
2	0	S	317	Pseudomonas syringae
2	2	S1	192087	Pseudomonas syringae pv. atrofaciens
4	4	S	2069256	Pseudomonas sp. XWY-1
3	3	S	1886807	Pseudomonas sp. TMW 2.1634
3	3	S	163011	Pseudomonas lini
3	3	S	1173270	Pseudomonas sp. R1-43-08
2	2	S	1415630	Pseudomonas sp. TKP
2	2	S	143813	Pseudomonas sp. LAB-08
2	2	S	198618	Pseudomonas umsongensis
2	2	S	1274359	Pseudomonas sihuiensis
1	0	S	321662	Pseudomonas moraviensis
1	1	S1	1395516	Pseudomonas moraviensis R28-S
1	1	S	253237	Pseudomonas sp. phDV1
1	1	S	237609	Pseudomonas alkylphenolica
465	0	G	1849530	Oblitimonas
465	465	S	1697053	Oblitimonas alkaliphila
6	6	S	2079806	Pseudomonadaceae bacterium SI-3
104	60	G	469	Acinetobacter
8	8	S	28090	Acinetobacter lwoffii
8	0	G1	909768	Acinetobacter calcoaceticus/baumannii complex
7	7	S	470	Acinetobacter baumannii
1	1	S	471	Acinetobacter calcoaceticus
7	7	S	40214	Acinetobacter johnsonii
5	5	S	40215	Acinetobacter junii
3	3	S	1608473	Acinetobacter sp. NCu2D-2
3	3	S	106649	Acinetobacter guillouiae
2	2	S	1758189	Acinetobacter sp. ACNIH2
2	2	S	108980	Acinetobacter ursingii
2	2	S	108981	Acinetobacter schindleri
1	1	S	29430	Acinetobacter haemolyticus
1	1	S	1636603	Acinetobacter sp. ACNIH1
1	1	S	756892	Acinetobacter indicus
1	0	S	52133	Acinetobacter venetianus
1	1	S1	1197884	Acinetobacter venetianus VE-C3
3	0	G	475	Moraxella
3	3	S	34062	Moraxella osloensis
1988	1862	G	613	Serratia
119	117	S	614	Serratia liquefaciens
2	2	S1	1346614	Serratia liquefaciens ATCC 27592
2	2	S	615	Serratia marcescens
2	2	S	61651	Serratia ficaria
2	2	S	137545	Serratia quinivorans
1	1	S	82996	Serratia plymuthica
382	61	G	583	Proteus
317	317	S	585	Proteus vulgaris
4	4	S	584	Proteus mirabilis
3	0	G	586	Providencia
3	3	S	333962	Providencia heimbachae
120	0	G	570	Klebsiella
115	0	S	573	Klebsiella pneumoniae
115	115	S1	72407	Klebsiella pneumoniae subsp. pneumoniae
5	5	S	548	Klebsiella aerogenes
96	0	G	547	Enterobacter
96	0	G1	354276	Enterobacter cloacae complex
96	96	S	550	Enterobacter cloacae
1	0	G	544	Citrobacter
1	1	G1	1344959	Citrobacter freundii complex
96	39	G	53335	Pantoea
56	0	G1	1654067	Pantoea agglomerans group
56	56	S	549	Pantoea agglomerans
1	1	S	470934	Pantoea vagans
4	2	G	551	Erwinia
2	2	S	55211	Erwinia persicina
155	72	G	338	Xanthomonas
55	54	S	339	Xanthomonas campestris
1	1	S1	340	Xanthomonas campestris pv. campestris
13	0	S	456327	Xanthomonas euvesicatoria
13	0	S1	359387	Xanthomonas euvesicatoria pv. alfalfae
13	13	S2	1365647	Xanthomonas euvesicatoria pv. alfalfae CFBP 3836
8	0	S	347	Xanthomonas oryzae
8	8	S1	64187	Xanthomonas oryzae pv. oryzae
5	0	S	56454	Xanthomonas hortorum
5	0	S1	487904	Xanthomonas hortorum pv. carotae
5	5	S2	863365	Xanthomonas hortorum pv. carotae str. M081
2	0	S	1985254	Xanthomonas phaseoli
1	0	S1	92828	Xanthomonas phaseoli pv. dieffenbachiae
1	1	S2	1437877	Xanthomonas phaseoli pv. dieffenbachiae LMG 695
1	1	S1	317013	Xanthomonas phaseoli pv. phaseoli
36	22	G	40323	Stenotrophomonas
9	9	S	128780	Stenotrophomonas acidaminiphila
4	0	G1	995085	Stenotrophomonas maltophilia group
4	1	S	40324	Stenotrophomonas maltophilia
3	3	S1	868597	Stenotrophomonas maltophilia JV3
1	1	S	216778	Stenotrophomonas rhizophila
31	0	G	83614	Luteimonas
31	31	S	2508168	Luteimonas sp. YGD11-2
5	0	G	83618	Pseudoxanthomonas
5	0	S	415229	Pseudoxanthomonas spadix
5	5	S1	1045855	Pseudoxanthomonas spadix BD-a59
2	0	G	75309	Rhodanobacter
2	2	S	666685	Rhodanobacter denitrificans
89	0	G	745	Pasteurella
89	0	S	747	Pasteurella multocida
89	89	S1	44283	Pasteurella multocida subsp. multocida
1	0	G	724	Haemophilus
1	0	S	727	Haemophilus influenzae
1	1	S1	1295140	Haemophilus influenzae CGSHiCZ412602
67	5	G	59753	Alcanivorax
53	53	S	2014542	Alcanivorax sp. N3-2A
6	0	S	1306787	Alcanivorax pacificus
6	6	S1	391936	Alcanivorax pacificus W11-5
3	3	S	1094342	Alcanivorax xenomutans
5	3	G	2745	Halomonas
2	2	S	2306583	Halomonas sp. JS92-SW72
2	0	G	187492	Thalassolituus
2	0	S	187493	Thalassolituus oleivorans
2	2	S1	1298593	Thalassolituus oleivorans MIL-1
71	0	G	43947	Tolumonas
71	0	S	43948	Tolumonas auensis
71	71	S1	595494	Tolumonas auensis DSM 9187
4	2	G	642	Aeromonas
2	2	S	1636608	Aeromonas sp. ASNIH3
23	15	G	445	Legionella
7	4	S	446	Legionella pneumophila
2	2	S1	91892	Legionella pneumophila subsp. fraseri
1	0	S1	91891	Legionella pneumophila subsp. pneumophila
1	1	S2	1312904	Legionella pneumophila subsp. pneumophila LPE509
1	0	S	96230	Legionella fallonii
1	1	S1	1212491	Legionella fallonii LLAP-10
17	0	G	469322	Steroidobacter
17	17	S	465721	Steroidobacter denitrificans
7	0	G	67575	Rheinheimera
4	4	S	2498451	Rheinheimera sp. LHK132
3	3	S	2545632	Rheinheimera sp. D18
3	0	G	53392	Thiodictyon
3	3	S	1166950	Candidatus Thiodictyon syntrophicum
3	0	G	106633	Thioalkalivibrio
3	0	S	1033854	Thioalkalivibrio sulfidiphilus
3	3	S1	396588	Thioalkalivibrio sulfidiphilus HL-EbGr7
9	8	G	22	Shewanella
1	1	S	62322	Shewanella baltica
1	0	G	226	Alteromonas
1	1	S	314275	Alteromonas mediterranea
1	0	G	2742	Marinobacter
1	1	S	1749259	Marinobacter sp. LQ44
4	0	G	630749	Spongiibacter
4	4	S	1620392	Spongiibacter sp. IMCC21906
1	0	G	1434050	Zhongshania
1	1	S	1470434	Zhongshania aliphaticivorans
4	4	G	10	Cellvibrio
8	0	G	662	Vibrio
5	0	S	29494	Vibrio furnissii
5	5	S1	903510	Vibrio furnissii NCTC 11218
3	3	S	55601	Vibrio anguillarum
4	0	G	1692042	Sulfurifustis
4	4	S	1675686	Sulfurifustis variabilis
3	0	G	34067	Cycloclasticus
3	3	S	728003	Cycloclasticus sp. PY97N
1	0	G	40222	Methylophaga
1	1	S	754476	Methylophaga nitratireducenticrescens
1	0	G	262	Francisella
1	1	S	475375	Francisella sp. MA067296
2	0	G	1193503	Gilliamella
2	2	S	1196095	Gilliamella apicola
2	0	G	1335631	Frischella
2	2	S	1267021	Frischella perrara
2	2	S	83406	gamma proteobacterium HdN1
286	18	G	911	Nitrobacter
264	0	S	912	Nitrobacter hamburgensis
264	264	S1	323097	Nitrobacter hamburgensis X14
4	0	S	913	Nitrobacter winogradskyi
4	4	S1	323098	Nitrobacter winogradskyi Nb-255
142	61	G	374	Bradyrhizobium
54	54	S	2057741	Bradyrhizobium sp. SK17
13	13	S	1325090	Bradyrhizobium guangdongense
10	10	S	1274631	Bradyrhizobium icense
1	1	S	1437360	Bradyrhizobium erythrophlei
1	1	S	288000	Bradyrhizobium sp. BTAi1
1	1	S	1325107	Bradyrhizobium sp. CCBAU 51778
1	1	S	722472	Bradyrhizobium lablabi
26	13	G	85413	Bosea
6	6	S	1867715	Bosea sp. Tri-49
5	5	S	1842539	Bosea sp. RAC05
2	2	S	2015316	Bosea sp. AS-1
7	7	S	709797	Bradyrhizobiaceae bacterium SG-6C
1	0	G	1033	Afipia
1	1	S	1882747	Afipia sp. GAS231
272	17	G	31988	Aminobacter
244	244	S	83263	Aminobacter aminovorans
11	11	S	374606	Aminobacter sp. MSH1
38	34	G	68287	Mesorhizobium
4	4	S	1670800	Mesorhizobium oceanicum
1	0	G	449972	Chelativorans
1	1	S	266779	Chelativorans sp. BNC1
57	4	G	379	Rhizobium
27	27	S	1125847	Rhizobium sp. NT-26
11	11	S	1869170	Rhizobium sp. S41
9	7	S	384	Rhizobium leguminosarum
2	0	S1	387	Rhizobium leguminosarum bv. viciae
2	2	S2	216596	Rhizobium leguminosarum bv. viciae 3841
3	3	S	2364272	Rhizobium sp. CCGE532
2	2	S	56730	Rhizobium gallicum
1	1	S	1571470	Rhizobium sp. ACO-34A
48	17	G	357	Agrobacterium
29	3	G1	1183400	Agrobacterium tumefaciens complex
26	26	S	358	Agrobacterium tumefaciens
2	2	S	1842536	Agrobacterium sp. RAC06
4	0	G	1525371	Neorhizobium
4	4	S	399	Neorhizobium galegae
52	0	G	106591	Ensifer
52	39	S	106592	Ensifer adhaerens
13	13	S1	1416753	Ensifer adhaerens OV14
43	7	G	28105	Sinorhizobium
34	34	S	382	Sinorhizobium meliloti
1	0	S	110321	Sinorhizobium medicae
1	1	S1	366394	Sinorhizobium medicae WSM419
1	1	S	1842534	Sinorhizobium sp. RAC02
203	26	G	528	Ochrobactrum
157	157	S	271865	Ochrobactrum sp. A44
17	17	S	571256	Ochrobactrum pituitosum
2	1	S	529	Ochrobactrum anthropi
1	1	S1	439375	Ochrobactrum anthropi ATCC 49188
1	1	S	419475	Ochrobactrum pseudogrignonense
43	0	G	1734920	Pseudorhodoplanes
43	43	S	1235591	Pseudorhodoplanes sinuspersici
20	0	G	256616	Parvibaculum
20	0	S	256618	Parvibaculum lavamentivorans
20	20	S1	402881	Parvibaculum lavamentivorans DS-1
7	3	G	2282523	Methylorubrum
4	0	S	408	Methylorubrum extorquens
4	4	S1	272630	Methylorubrum extorquens AM1
4	4	G	407	Methylobacterium
3	0	G	186650	Microvirga
3	3	S	1882682	Microvirga ossetica
4	0	G	46913	Devosia
3	3	S	2083786	Devosia sp. I507
1	1	S	1736675	Devosia sp. A16
1	1	G	81	Hyphomicrobium
1	0	G	29407	Rhodoplanes
1	1	S	674703	Rhodoplanes sp. Z2-YC6860
1	0	G	120652	Methylocella
1	1	S	227605	Methylocella tundrae
1	0	G	293088	Martelella
1	0	S	293089	Martelella mediterranea
1	1	S1	1122214	Martelella mediterranea DSM 17316
1	0	G	6	Azorhizobium
1	0	S	7	Azorhizobium caulinodans
1	1	S1	438753	Azorhizobium caulinodans ORS 571
83	25	G	165697	Sphingopyxis
31	31	S	2054227	Sphingopyxis sp. WS5A3p
12	12	S	33050	Sphingopyxis macrogoltabida
5	5	S	1866325	Sphingopyxis sp. MG
4	4	S	1914525	Sphingopyxis sp. FD7
3	3	S	1515612	Sphingopyxis fribergensis
2	2	S	267128	Sphingopyxis granuli
1	1	S	1874061	Sphingopyxis sp. EG6
36	1	G	13687	Sphingomonas
33	33	S	1921510	Sphingomonas sp. JJ-A5
1	1	S	2492837	Sphingomonas sp. C8-2
1	1	S	160791	Sphingomonas wittichii
29	18	G	165695	Sphingobium
5	5	S	135719	Sphingobium amiense
3	3	S	2082188	Sphingobium sp. YG1
2	2	S	2072936	Sphingobium sp. SCG-1
1	1	S	1332080	Sphingobium baderi
27	1	G	165696	Novosphingobium
23	23	S	158500	Novosphingobium resinovorum
3	3	S	1016987	Novosphingobium sp. THN1
4	0	G	335405	Sphingosinicella
4	4	S	335406	Sphingosinicella microcystinivorans
3	3	G	150203	Blastomonas
3	2	G	1434046	Sphingorhabdus
1	1	S	2077182	Sphingorhabdus sp. YGSMI21
7	0	G	1295327	Croceicoccus
5	5	S	1348774	Croceicoccus naphthovorans
2	2	S	450378	Croceicoccus marinus
1	0	G	1111	Porphyrobacter
1	1	S	2003315	Porphyrobacter sp. CACIAM 03H1
1	0	G	361177	Altererythrobacter
1	1	S	2060312	Altererythrobacter sp. B11
101	0	G	1443919	Tabrizicola
101	101	S	2494374	Tabrizicola sp. K13M18
35	0	G	227873	Pannonibacter
35	35	S	121719	Pannonibacter phragmitetus
16	2	G	265	Paracoccus
5	5	S	147645	Paracoccus yeei
5	5	S	2500532	Paracoccus sp. Arc7-R13
3	3	S	34004	Paracoccus aminovorans
1	1	S	1077935	Paracoccus zhejiangensis
9	0	G	2211641	Yoonia
9	9	S	245188	Yoonia vestfoldensis
7	0	G	309512	Dinoroseobacter
7	0	S	215813	Dinoroseobacter shibae
7	7	S1	398580	Dinoroseobacter shibae DFL 12 = DSM 16493
4	0	G	875170	Celeribacter
4	4	S	1208324	Celeribacter indicus
3	0	G	34008	Rhodovulum
3	3	S	1564506	Rhodovulum sp. P5
3	0	G	60136	Sulfitobacter
3	3	S	1968541	Sulfitobacter sp. D7
3	0	G	204456	Gemmobacter
3	3	S	2169400	Gemmobacter sp. HYN0069
2	0	G	1060	Rhodobacter
2	0	S	1063	Rhodobacter sphaeroides
2	2	S1	557760	Rhodobacter sphaeroides KD131
21	11	G	85	Hyphomonas
7	7	S	1873716	Hyphomonas sp. CACIAM 19H1
3	0	S	81032	Hyphomonas neptunium
3	3	S1	228405	Hyphomonas neptunium ATCC 15444
38	6	G	20	Phenylobacterium
32	0	S	284016	Phenylobacterium zucineum
32	32	S1	450851	Phenylobacterium zucineum HLK1
26	19	G	41275	Brevundimonas
7	7	S	588932	Brevundimonas naejangsanensis
33	33	S	2341112	Alphaproteobacteria bacterium WS11
6	0	G	213485	Micavibrio
6	6	S	349221	Micavibrio aeruginosavorus
1	0	G	434	Acetobacter
1	1	S	1076596	Acetobacter persici
1	0	G	50714	Acidisphaera
1	1	S	1969806	Acidisphaera sp. G45-3
2	0	G	191	Azospirillum
2	2	S	192	Azospirillum brasilense
1757	759	G	507	Alcaligenes
976	976	S	511	Alcaligenes faecalis
22	22	S	323284	Alcaligenes aquatilis
1412	22	G	305976	Pusillimonas
1349	1349	S	1007105	Pusillimonas sp. T7-7
41	41	S	2028345	Pusillimonas sp. ye3
50	3	G	517	Bordetella
31	31	S	2163011	Bordetella sp. HZ20
16	16	S	94624	Bordetella petrii
28	19	G	222	Achromobacter
4	4	S	217203	Achromobacter spanius
3	0	S	85698	Achromobacter xylosoxidans
3	3	S1	762376	Achromobacter xylosoxidans A8
2	2	S	32002	Achromobacter denitrificans
18	5	G	290425	Advenella
13	0	S	310575	Advenella kashmirensis
13	13	S1	1036672	Advenella kashmirensis WT001
7	0	G	90243	Oligella
7	7	S	90245	Oligella urethralis
180	58	G	34072	Variovorax
119	83	S	34073	Variovorax paradoxus
16	16	S1	543728	Variovorax paradoxus S110
12	12	S1	595537	Variovorax paradoxus EPS
8	8	S1	1246301	Variovorax paradoxus B4
3	3	S	436515	Variovorax boronicumulans
45	15	G	47420	Hydrogenophaga
15	15	S	2184519	Hydrogenophaga sp. NH-16
14	14	S	1842537	Hydrogenophaga sp. RAC07
1	1	S	795665	Hydrogenophaga sp. PBC
30	15	G	52972	Polaromonas
12	12	S	296591	Polaromonas sp. JS666
3	3	S	2268087	Polaromonas sp. SP1
21	2	G	2490452	Serpentinomonas
16	16	S	1458426	Serpentinomonas mccroryi
3	3	S	1458425	Serpentinomonas raichei
9	6	G	12916	Acidovorax
3	3	S	232721	Acidovorax sp. JS42
5	5	G	80865	Delftia
1	0	G	174951	Ramlibacter
1	1	S	94132	Ramlibacter tataouinensis
1	0	G	283	Comamonas
1	1	S	225992	Comamonas kerstersii
252	3	G	48736	Ralstonia
235	235	S	305	Ralstonia solanacearum
9	1	S	329	Ralstonia pickettii
8	8	S1	428406	Ralstonia pickettii 12D
5	5	S	190721	Ralstonia insidiosa
49	40	G	32008	Burkholderia
5	5	S	1705310	Burkholderia sp. IDO3
2	1	G1	87882	Burkholderia cepacia complex
1	1	S	95486	Burkholderia cenocepacia
2	0	G1	111527	pseudomallei group
2	2	S	1637837	Burkholderia sp. MSMB0266
8	5	G	106589	Cupriavidus
2	2	S	106590	Cupriavidus necator
1	1	S	119219	Cupriavidus metallidurans
3	0	G	1822464	Paraburkholderia
3	3	S	2026199	Paraburkholderia aromaticivorans
8	3	G	316612	Methylibium
5	0	S	105560	Methylibium petroleiphilum
5	5	S1	420662	Methylibium petroleiphilum PM1
1	0	G	149698	Massilia
1	1	S	2045208	Massilia violaceinigra
1	0	G	303379	Herminiimonas
1	1	S	204773	Herminiimonas arsenicoxydans
183	78	G	914	Nitrosomonas
102	102	S	44577	Nitrosomonas ureae
2	2	S	44574	Nitrosomonas communis
1	0	S	916	Nitrosomonas eutropha
1	1	S1	335283	Nitrosomonas eutropha C91
6	0	G	35798	Nitrosospira
6	0	S	35799	Nitrosospira briensis
6	6	S1	1266925	Nitrosospira briensis C-128
1	0	G	404	Methylobacillus
1	0	S	405	Methylobacillus flagellatus
1	1	S1	265072	Methylobacillus flagellatus KT
1	1	G	81682	Methylovorus
22	8	G	33057	Thauera
9	9	S	96773	Thauera chlorobenzoica
5	0	S	59405	Thauera aromatica
5	5	S1	44139	Thauera aromatica K172
2	0	G	551759	Aromatoleum
2	0	S	551760	Aromatoleum aromaticum
2	2	S1	76114	Aromatoleum aromaticum EbN1
25	7	G	482	Neisseria
18	18	S	485	Neisseria gonorrhoeae
22	0	G	40	Stigmatella
22	0	S	41	Stigmatella aurantiaca
22	22	S1	378806	Stigmatella aurantiaca DW4/3-1
4	0	G	83461	Corallococcus
4	0	S	184914	Corallococcus coralloides
4	4	S1	1144275	Corallococcus coralloides DSM 2259
2	2	G	32	Myxococcus
5	0	G	39643	Sorangium
5	5	S	56	Sorangium cellulosum
14	7	G	28196	Arcobacter
3	3	S	913109	Arcobacter ellisii
2	2	S	28197	Arcobacter butzleri
1	1	S	28198	Arcobacter cryaerophilus
1	0	S	1278212	Arcobacter suis
1	1	S1	663365	Arcobacter suis CECT 7833
16	0	G	70774	Hydrogenophilus
16	16	S	297	Hydrogenophilus thermoluteolus
1	1	G	958	Bdellovibrio
456	127	G	76831	Myroides
320	0	S	256	Myroides odoratus
320	320	S1	929704	Myroides odoratus DSM 2801
8	8	S	1583100	Myroides sp. A21
1	1	S	1458492	Myroides sp. ZB35
13	9	G	237	Flavobacterium
4	4	S	1306519	Flavobacterium commune
11	8	G	59732	Chryseobacterium
2	2	S	2478663	Chryseobacterium sp. 3008163
1	1	S	1493872	Chryseobacterium shandongense
4	0	G	501783	Cloacibacterium
4	4	S	237258	Cloacibacterium normanense
3	0	G	292691	Gramella
3	0	S	1486245	Gramella flava
3	3	S1	1229726	Gramella flava JLT2011
3	0	G	308865	Elizabethkingia
2	2	S	2575699	Elizabethkingia sp. 2-6
1	1	S	1756149	Elizabethkingia bruuniana
2	0	G	1013	Weeksella
2	2	S	1014	Weeksella virosa
2	0	G	252306	Robiginitalea
2	0	S	252307	Robiginitalea biformata
2	2	S1	313596	Robiginitalea biformata HTCC2501
1	0	G	527198	Mariniflexile
1	1	S	2027857	Mariniflexile sp. TRM1-10
96	0	G	84567	Pedobacter
96	96	S	363852	Pedobacter ginsengisoli
16	3	G	28453	Sphingobacterium
10	10	S	1538644	Sphingobacterium sp. ML3W
3	3	S	561061	Sphingobacterium psychroaquaticum
1	0	G	1649482	Pseudopedobacter
1	0	S	151895	Pseudopedobacter saltans
1	1	S1	762903	Pseudopedobacter saltans DSM 12145
10	1	G	816	Bacteroides
9	0	S	151276	Bacteroides coprosuis
9	9	S1	679937	Bacteroides coprosuis DSM 18011
1	0	G	307628	Petrimonas
1	1	S	1642646	Petrimonas mucosa
1	0	G	1784836	Fermentimonas
1	1	S	1562970	Fermentimonas caenicola
2	0	G	838	Prevotella
2	2	S	28135	Prevotella oris
2	0	G	346096	Paludibacter
2	0	S	185300	Paludibacter propionicigenes
2	2	S1	694427	Paludibacter propionicigenes WB4
4	0	G	105	Runella
4	4	S	2259595	Runella sp. HYN0085
2	0	G	232244	Belliella
2	0	S	232259	Belliella baltica
2	2	S1	866536	Belliella baltica DSM 15883
1	0	G	390846	Echinicola
1	1	S	1807691	Echinicola rosea
1	0	G	2349	Haliscomenobacter
1	0	S	2350	Haliscomenobacter hydrossis
1	1	S1	760192	Haliscomenobacter hydrossis DSM 1100
22	0	G	71666	Waddlia
22	0	S	71667	Waddlia chondrophila
22	22	S1	716544	Waddlia chondrophila WSU 86-1044
10	0	G	123	Pirellula
10	0	S	125	Pirellula staleyi
10	10	S1	530564	Pirellula staleyi DSM 6068
4	0	G	1649480	Planctopirus
4	0	S	120	Planctopirus limnophila
4	4	S1	521674	Planctopirus limnophila DSM 3776
2	0	G	466152	Singulisphaera
2	0	S	466153	Singulisphaera acidiphila
2	2	S1	886293	Singulisphaera acidiphila DSM 18658
42	28	G	1234	Nitrospira
10	10	S	330214	Nitrospira defluvii
3	3	S	42253	Nitrospira moscoviensis
1	1	S	1715989	Candidatus Nitrospira inopinata
27	0	G	2004797	Luteitalea
27	27	S	1855912	Luteitalea pratensis
3	0	G	171	Leptospira
3	0	S	172	Leptospira biflexa
3	3	S1	145259	Leptospira biflexa serovar Patoc
2	0	G	81461	Thermanaerovibrio
2	0	S	81462	Thermanaerovibrio acidaminovorans
2	2	S1	525903	Thermanaerovibrio acidaminovorans DSM 6589
1	0	G	1511648	Defluviitoga
1	1	S	1006576	Defluviitoga tunisiensis
Tot G=307 Tot S=744
*A rank code, indicating (U)nclassified, (D)omain, (K)ingdom, (P)hylum, (C)lass, (O)rder, (F)amily, (G)enus, or (S)pecies. All other ranks are simply filled with a dash.

## Sheet: T46_virus
Number of reads covered by the clade rooted at this taxon	Number of reads assigned directly to this taxon	Rank code*	NCBI taxonomy ID	Indented scientific name
87	0	S	45617	Human endogenous retrovirus K
87	87	S1	166122	Human endogenous retrovirus K113
42	0	G	1921122	Nonanavirus
42	0	G1	2315205	unclassified Nonanavirus
42	42	S	1969841	Proteus phage VB_PmiS-Isfahan
3	0	G	680116	Spbetavirus
3	0	G1	1732062	unclassified Spbetalikevirus
3	3	S	1732063	Staphylococcus phage SPbeta-like
2	0	G	2169655	Pulverervirus
2	0	G1	2340861	unclassified Pulverervirus
2	2	S	1838138	Propionibacterium phage PFR2
2	2	G	1982251	Pahexavirus
1	1	G	1982239	Nipunavirus
5	2	G	2169625	Svunavirus
2	0	S	2170221	Geobacillus virus GBSV1
2	2	S1	365048	Geobacillus phage GBSV1
1	1	S	396034	Bacillus virus 1
4	0	G	2560197	Otagovirus
4	0	S	2560680	Pseudomonas virus Psa374
4	4	S1	1458843	Pseudomonas phage phiPsa374
1	0	G	186789	Punavirus
1	0	S	2560732	Salmonella virus SJ46
1	1	S1	1815968	Salmonella phage SJ46
6	1	G	2560102	Bifseptvirus
5	0	S	2560655	Pseudomonas virus Andromeda
5	5	S1	1873949	Pseudomonas phage Andromeda
1	0	G	1511854	Betanudivirus
1	0	S	29250	Heliothis zea nudivirus
1	1	S1	1128424	Helicoverpa zea nudivirus 2
Tot G=13 Tot S=16
*A rank code, indicating (U)nclassified, (D)omain, (K)ingdom, (P)hylum, (C)lass, (O)rder, (F)amily, (G)enus, or (S)pecies. All other ranks are simply filled with a dash.

## Sheet: T46_protozoa
Number of reads covered by the clade rooted at this taxon	Number of reads assigned directly to this taxon	Rank code*	NCBI taxonomy ID	Indented scientific name
19790	0	G	5810	Toxoplasma
19790	0	S	5811	Toxoplasma gondii
19790	19790	S1	508771	Toxoplasma gondii ME49
298	15	G	5820	Plasmodium
172	0	G1	418103	Plasmodium (Plasmodium)
171	171	S	5855	Plasmodium vivax
1	1	S	5858	Plasmodium malariae
111	111	S	208452	Plasmodium coatneyi
1	0	G	5864	Babesia
1	1	S	5866	Babesia bigemina
6	0	G	5658	Leishmania
6	0	G1	38568	Leishmania
6	0	G2	38582	Leishmania mexicana species complex
6	0	S	5665	Leishmania mexicana
6	6	S1	929439	Leishmania mexicana MHOM/GT/2001/U1103
2	0	G	5690	Trypanosoma
2	0	G1	39700	Trypanozoon
2	0	S	5691	Trypanosoma brucei
2	0	S1	31285	Trypanosoma brucei gambiense
2	2	S2	679716	Trypanosoma brucei gambiense DAL972
1	0	G	5782	Dictyostelium
1	0	S	44689	Dictyostelium discoideum
1	1	S1	352472	Dictyostelium discoideum AX4
Tot G=10 Tot S=13
*A rank code, indicating (U)nclassified, (D)omain, (K)ingdom, (P)hylum, (C)lass, (O)rder, (F)amily, (G)enus, or (S)pecies. All other ranks are simply filled with a dash.
