# Supplementary material for: First Glimpse into the Genomic Characterization of People from the Imperial Roman Community of Casal Bertone (Rome, First–Third Centuries AD)
Source: Genes (Basel). 2022 Jan 13;13(1):136. doi: 10.3390/genes13010136 (PMC8774527; doi:10.3390/genes13010136)
Supplement: Supplementary file 1 [file genes-13-00136-s001.zip › Supplementary Table S5.xlsx]

## Sheet: F4_I_bacteria
Supplementary Table S5: Microbial findings for F4_I.
Number of reads covered by the clade rooted at this taxon	Number of reads assigned directly to this taxon	Rank code*	NCBI taxonomy ID	Indented scientific name
930	750	G	286	Pseudomonas
37	3	G1	136846	Pseudomonas stutzeri group
32	0	G2	578833	Pseudomonas stutzeri subgroup
32	5	S	316	Pseudomonas stutzeri
19	19	S1	1123519	Pseudomonas stutzeri DSM 10701
8	8	S1	379731	Pseudomonas stutzeri A1501
2	2	S	271420	Pseudomonas xanthomarina
26	26	S	198618	Pseudomonas umsongensis
20	0	S	101564	Pseudomonas alcaliphila
20	20	S1	741155	Pseudomonas alcaliphila JAB1
14	2	G1	136849	Pseudomonas syringae group
12	12	S	33069	Pseudomonas viridiflava
12	2	G1	136845	Pseudomonas putida group
9	7	S	303	Pseudomonas putida
2	2	S1	390235	Pseudomonas putida W619
1	1	S	47885	Pseudomonas oryzihabitans
11	2	G1	136841	Pseudomonas aeruginosa group
4	4	S	287	Pseudomonas aeruginosa
3	2	S	300	Pseudomonas mendocina
1	1	S1	1001585	Pseudomonas mendocina NK-01
2	0	G2	1232139	Pseudomonas oleovorans/pseudoalcaligenes group
2	2	S	301	Pseudomonas oleovorans
8	8	S	312306	Pseudomonas entomophila
7	7	S	104087	Pseudomonas frederiksbergensis
7	0	G1	136843	Pseudomonas fluorescens group
7	6	S	294	Pseudomonas fluorescens
1	1	S1	746360	Pseudomonas fluorescens WH6
5	5	S	797277	Pseudomonas litoralis
4	0	G1	136842	Pseudomonas chlororaphis group
3	3	S	587753	Pseudomonas chlororaphis
1	1	S	47884	Pseudomonas taetrolens
4	4	S	86265	Pseudomonas thivervalensis
3	3	S	2054914	Pseudomonas sp. 02C 26
3	1	S	321662	Pseudomonas moraviensis
2	2	S1	1395516	Pseudomonas moraviensis R28-S
3	3	S	930166	Pseudomonas brassicacearum
2	2	S	2505979	Pseudomonas sp. 11K1
2	2	S	1499686	Pseudomonas saudiphocaensis
2	2	S	1415630	Pseudomonas sp. TKP
2	2	S	216142	Pseudomonas rhizosphaerae
1	1	S	2005388	Pseudomonas sp. RU47
1	1	S	1855331	Pseudomonas sp. A214
1	1	S	1853130	Pseudomonas silesiensis
1	1	S	2083054	Pseudomonas sp. LG1D9
1	1	S	198620	Pseudomonas koreensis
1	1	S	237609	Pseudomonas alkylphenolica
1	1	S	1736226	Pseudomonas sp. Leaf58
1	1	S	2320270	Pseudomonas sp. DG56-2
2	0	G	1849530	Oblitimonas
2	2	S	1697053	Oblitimonas alkaliphila
389	310	G	469	Acinetobacter
23	23	S	40214	Acinetobacter johnsonii
23	6	G1	909768	Acinetobacter calcoaceticus/baumannii complex
15	15	S	471	Acinetobacter calcoaceticus
2	2	S	470	Acinetobacter baumannii
13	13	S	1636603	Acinetobacter sp. ACNIH1
7	7	S	40215	Acinetobacter junii
5	5	S	28090	Acinetobacter lwoffii
5	5	S	1646498	Acinetobacter sp. TTH0-4
3	3	S	1608473	Acinetobacter sp. NCu2D-2
9	0	G	475	Moraxella
9	9	S	34062	Moraxella osloensis
1	1	G	497	Psychrobacter
102	8	G	547	Enterobacter
94	23	G1	354276	Enterobacter cloacae complex
69	69	S	550	Enterobacter cloacae
2	2	S	299767	Enterobacter ludwigii
88	0	G	570	Klebsiella
88	0	S	573	Klebsiella pneumoniae
88	88	S1	72407	Klebsiella pneumoniae subsp. pneumoniae
20	6	G	561	Escherichia
14	12	S	562	Escherichia coli
2	2	S1	930406	Escherichia coli O157:H16
5	0	G	82976	Buttiauxella
5	5	S	2479367	Buttiauxella sp. 3AFRM03
4	0	G	544	Citrobacter
4	4	G1	1344959	Citrobacter freundii complex
2	0	G	579	Kluyvera
2	2	S	61648	Kluyvera intermedia
130	65	G	53335	Pantoea
65	0	G1	1654067	Pantoea agglomerans group
65	65	S	549	Pantoea agglomerans
51	1	G	551	Erwinia
34	34	S	55211	Erwinia persicina
16	16	S	1619313	Erwinia gerundensis
43	28	G	613	Serratia
14	12	S	82996	Serratia plymuthica
2	2	S1	1154756	Serratia plymuthica PRI-2C
1	1	S	614	Serratia liquefaciens
3	0	G	581	Morganella
3	3	S	582	Morganella morganii
1	0	G	583	Proteus
1	1	S	584	Proteus mirabilis
85	55	G	338	Xanthomonas
30	27	S	339	Xanthomonas campestris
3	3	S1	340	Xanthomonas campestris pv. campestris
16	0	G	83618	Pseudoxanthomonas
16	0	S	314722	Pseudoxanthomonas suwonensis
16	16	S1	743721	Pseudoxanthomonas suwonensis 11-1
15	14	G	40323	Stenotrophomonas
1	1	S	216778	Stenotrophomonas rhizophila
1	1	G	68	Lysobacter
1	0	G	83614	Luteimonas
1	1	S	2508168	Luteimonas sp. YGD11-2
99	0	G	745	Pasteurella
99	0	S	747	Pasteurella multocida
99	99	S1	44283	Pasteurella multocida subsp. multocida
5	0	G	53246	Pseudoalteromonas
5	5	S	621376	Pseudoalteromonas donghaensis
2	2	G	22	Shewanella
1	1	G	2742	Marinobacter
4	1	G	1227	Nitrosococcus
3	0	S	1229	Nitrosococcus oceani
3	3	S1	323261	Nitrosococcus oceani ATCC 19707
3	0	G	1744881	Sulfuricaulis
3	3	S	1620215	Sulfuricaulis limicola
3	0	G	10	Cellvibrio
3	3	S	1987723	Cellvibrio sp. PSBB006
3	0	G	469322	Steroidobacter
3	3	S	465721	Steroidobacter denitrificans
2	0	G	662	Vibrio
2	2	S	676	Vibrio fluvialis
1	0	G	73778	Methylocaldum
1	1	S	1432792	Methylocaldum marinum
317	114	G	357	Agrobacterium
202	30	G1	1183400	Agrobacterium tumefaciens complex
172	170	S	358	Agrobacterium tumefaciens
2	2	S1	1300224	Agrobacterium tumefaciens P4
1	1	S	861208	Agrobacterium sp. H13-3
5	0	G	379	Rhizobium
3	0	S	29449	Rhizobium etli
3	3	S1	538025	Rhizobium etli 8C-3
1	1	S	384	Rhizobium leguminosarum
1	1	S	1869170	Rhizobium sp. S41
334	40	G	28105	Sinorhizobium
294	291	S	382	Sinorhizobium meliloti
2	2	S1	1235461	Sinorhizobium meliloti GR4
1	1	S1	693982	Sinorhizobium meliloti AK83
13	0	G	106591	Ensifer
13	3	S	106592	Ensifer adhaerens
10	10	S1	1416753	Ensifer adhaerens OV14
11	10	G	374	Bradyrhizobium
1	1	S	2057741	Bradyrhizobium sp. SK17
3	0	G	85413	Bosea
3	3	S	1842539	Bosea sp. RAC05
2	2	G	911	Nitrobacter
20	1	G	528	Ochrobactrum
10	10	S	271865	Ochrobactrum sp. A44
9	7	S	529	Ochrobactrum anthropi
2	2	S1	439375	Ochrobactrum anthropi ATCC 49188
12	0	G	449972	Chelativorans
12	12	S	266779	Chelativorans sp. BNC1
2	0	G	68287	Mesorhizobium
1	0	S	71433	Mesorhizobium amorphae
1	1	S1	1082933	Mesorhizobium amorphae CCNWGS0123
1	1	S	2108445	Mesorhizobium sp. DCY119
1	0	G	31988	Aminobacter
1	1	S	83263	Aminobacter aminovorans
2	2	G	2282523	Methylorubrum
1	1	G	407	Methylobacterium
1	0	G	81	Hyphomicrobium
1	1	S	53399	Hyphomicrobium denitrificans
48	8	G	265	Paracoccus
32	32	S	2500532	Paracoccus sp. Arc7-R13
4	4	S	266	Paracoccus denitrificans
3	3	S	2065379	Paracoccus sp. CBA4604
1	0	S	34003	Paracoccus aminophilus
1	1	S1	1367847	Paracoccus aminophilus JCM 7686
2	0	G	227873	Pannonibacter
2	1	S	121719	Pannonibacter phragmitetus
1	1	S1	1402210	Pannonibacter phragmitetus BB
1	0	G	1443919	Tabrizicola
1	1	S	2494374	Tabrizicola sp. K13M18
2	0	G	85	Hyphomonas
2	0	S	81032	Hyphomonas neptunium
2	2	S1	228405	Hyphomonas neptunium ATCC 15444
7	0	G	165696	Novosphingobium
5	0	S	48935	Novosphingobium aromaticivorans
5	5	S1	279238	Novosphingobium aromaticivorans DSM 12444
1	0	S	205844	Novosphingobium pentaromativorans
1	1	S1	1088721	Novosphingobium pentaromativorans US6-1
1	1	S	702113	Novosphingobium sp. PP1Y
5	1	G	165695	Sphingobium
2	2	S	1332080	Sphingobium baderi
1	1	S	1673076	Sphingobium hydrophobicum
1	1	S	13690	Sphingobium yanoikuyae
5	0	G	165697	Sphingopyxis
2	2	S	292913	Sphingopyxis sp. 113P3
2	2	S	2565556	Sphingopyxis sp. PAMC25046
1	1	S	1866325	Sphingopyxis sp. MG
4	1	G	13687	Sphingomonas
2	2	S	93064	Sphingomonas koreensis
1	1	S	1549858	Sphingomonas taxi
1	0	G	1041	Erythrobacter
1	1	S	1648404	Erythrobacter atlanticus
5	4	G	780	Rickettsia
1	1	G1	114277	spotted fever group
3	3	G	953	Wolbachia
3	3	G	1632780	Phreatobacter
2	0	G	991903	Polymorphum
2	0	S	991904	Polymorphum gilvum
2	2	S1	991905	Polymorphum gilvum SL003B-26A1
2	2	G	41275	Brevundimonas
1	1	G	75	Caulobacter
118	13	G	52972	Polaromonas
102	102	S	296591	Polaromonas sp. JS666
3	3	S	2268087	Polaromonas sp. SP1
115	10	G	47420	Hydrogenophaga
80	80	S	1842537	Hydrogenophaga sp. RAC07
25	25	S	2184519	Hydrogenophaga sp. NH-16
28	11	G	34072	Variovorax
15	11	S	34073	Variovorax paradoxus
4	4	S1	543728	Variovorax paradoxus S110
2	2	S	436515	Variovorax boronicumulans
4	1	G	12916	Acidovorax
2	2	S	1842533	Acidovorax sp. RAC01
1	1	S	358220	Acidovorax sp. KKS102
3	1	G	2490452	Serpentinomonas
2	2	S	1458426	Serpentinomonas mccroryi
2	2	G	80865	Delftia
1	0	G	665874	Limnohabitans
1	1	S	1678128	Limnohabitans sp. 63ED37-2
187	0	G	48736	Ralstonia
181	181	S	305	Ralstonia solanacearum
6	6	S	190721	Ralstonia insidiosa
7	6	G	32008	Burkholderia
1	0	G1	87882	Burkholderia cepacia complex
1	1	S	1503055	Burkholderia territorii
5	4	G	106589	Cupriavidus
1	1	S	119219	Cupriavidus metallidurans
1	0	G	1822464	Paraburkholderia
1	1	S	134537	Paraburkholderia fungorum
16	7	G	507	Alcaligenes
9	9	S	511	Alcaligenes faecalis
16	0	G	305976	Pusillimonas
9	9	S	1007105	Pusillimonas sp. T7-7
7	7	S	2028345	Pusillimonas sp. ye3
15	14	G	222	Achromobacter
1	1	S	32002	Achromobacter denitrificans
15	4	G	290425	Advenella
11	0	S	310575	Advenella kashmirensis
11	11	S1	1036672	Advenella kashmirensis WT001
2	0	G	517	Bordetella
2	2	S	94624	Bordetella petrii
2	2	G	149698	Massilia
25	3	G	914	Nitrosomonas
18	0	S	915	Nitrosomonas europaea
18	18	S1	228410	Nitrosomonas europaea ATCC 19718
2	0	S	916	Nitrosomonas eutropha
2	2	S1	335283	Nitrosomonas eutropha C91
2	2	S	44577	Nitrosomonas ureae
5	3	G	359407	Methylotenera
2	0	S	359408	Methylotenera mobilis
2	2	S1	583345	Methylotenera mobilis JLW8
1	0	G	378210	Methyloversatilis
1	1	S	1842540	Methyloversatilis sp. RAC08
23	0	G	482	Neisseria
23	23	S	485	Neisseria gonorrhoeae
1	1	G	73029	Dechloromonas
23	0	G	39643	Sorangium
23	22	S	56	Sorangium cellulosum
1	1	S1	1254432	Sorangium cellulosum So0157-2
1	1	G	32	Myxococcus
1107	455	G	1279	Staphylococcus
385	385	S	1280	Staphylococcus aureus
81	81	S	1296	Staphylococcus sciuri
64	64	S	214473	Staphylococcus nepalensis
53	53	S	29382	Staphylococcus cohnii
15	15	S	246432	Staphylococcus equorum
14	14	S	1288	Staphylococcus xylosus
12	10	S	1282	Staphylococcus epidermidis
2	2	S1	1449752	Staphylococcus epidermidis PM221
12	12	S	1290	Staphylococcus hominis
9	9	S	61015	Staphylococcus succinus
4	4	S	29384	Staphylococcus kloosii
1	1	S	1283	Staphylococcus haemolyticus
1	1	S	1715860	Staphylococcus sp. AntiMn-1
1	1	S	29388	Staphylococcus capitis
174	0	G	45669	Salinicoccus
174	174	S	407035	Salinicoccus halodurans
27	0	G	227979	Jeotgalicoccus
27	27	S	1461582	Jeotgalicoccus saudimassiliensis
2	0	G	2005363	Auricoccus
2	2	S	1849491	Auricoccus indicus
256	144	G	1386	Bacillus
56	56	S	79880	Bacillus clausii
33	13	G1	86661	Bacillus cereus group
14	1	S	1428	Bacillus thuringiensis
10	0	S1	180854	Bacillus thuringiensis serovar huazhongensis
10	10	S2	527030	Bacillus thuringiensis serovar huazhongensis BGSC 4BD1
3	0	S1	180877	Bacillus thuringiensis serovar pulsiensis
3	3	S2	527028	Bacillus thuringiensis serovar pulsiensis BGSC 4CC1
6	5	S	1396	Bacillus cereus
1	1	S1	526986	Bacillus cereus Rock3-44
7	2	G1	653685	Bacillus subtilis group
2	0	S	1423	Bacillus subtilis
2	2	S1	1204342	Bacillus subtilis BEST7003
2	0	G2	653388	Bacillus mojavensis subgroup
2	2	S	260554	Bacillus halotolerans
1	1	S	1402	Bacillus licheniformis
4	4	S	450367	[Brevibacterium] frigoritolerans
4	0	S	665099	Bacillus oceanisediminis
4	4	S1	1196031	Bacillus oceanisediminis 2691
2	1	S	1404	Bacillus megaterium
1	1	S1	1348623	Bacillus megaterium NBRC 15308 = ATCC 14581
2	2	S	1478	Bacillus simplex
1	1	S	86664	Bacillus flexus
1	1	S	1565991	Bacillus sp. X1(2014)
1	1	S	859143	Bacillus kochii
1	1	S	1408	Bacillus pumilus
18	15	G	129337	Geobacillus
2	0	G1	1505648	Geobacillus thermoleovorans group
2	2	S	1462	Geobacillus kaustophilus
1	1	S	33940	Geobacillus thermodenitrificans
8	0	G	459532	Terribacillus
8	8	S	386490	Terribacillus goriensis
6	4	G	400634	Lysinibacillus
1	1	S	2072025	Lysinibacillus sp. YS11
1	1	S	2169540	Lysinibacillus sp. 2017
6	2	G	1329200	Fictibacillus
4	4	S	255247	Fictibacillus arsenicus
5	1	G	84406	Virgibacillus
3	3	S	1482	Virgibacillus halodenitrificans
1	1	S	2017483	Virgibacillus phasianinus
4	0	G	1055323	Aeribacillus
4	4	S	33936	Aeribacillus pallidus
2	0	G	29331	Amphibacillus
2	0	S	1449	Amphibacillus xylanus
2	2	S1	698758	Amphibacillus xylanus NBRC 15112
2	0	G	351195	Salimicrobium
2	2	S	1230341	Salimicrobium jeotgali
1	1	G	150247	Anoxybacillus
1	0	G	182709	Oceanobacillus
1	1	S	182710	Oceanobacillus iheyensis
1	0	G	1906945	Parageobacillus
1	1	S	1295642	Parageobacillus genomosp. 1
90	0	G	160795	Ureibacillus
90	90	S	51173	Ureibacillus thermosphaericus
16	0	G	648800	Solibacillus
16	16	S	76853	Solibacillus silvestris
3	3	G	1372	Planococcus
2	0	G	1649	Kurthia
2	2	S	1750719	Kurthia sp. 11kri321
42	30	G	44249	Paenibacillus
3	3	S	1338368	Paenibacillus lentus
3	3	S	162209	Paenibacillus naphthalenovorans
3	3	S	481743	Paenibacillus sp. Y412MC10
1	1	S	1406	Paenibacillus polymyxa
1	1	S	61624	Paenibacillus mucilaginosus
1	1	S	528191	Paenibacillus xylanexedens
27	1	G	55080	Brevibacillus
26	26	S	1465	Brevibacillus laterosporus
22	0	G	76632	Thermobacillus
22	0	S	377615	Thermobacillus composti
22	22	S1	717605	Thermobacillus composti KWC4
1	0	G	55079	Aneurinibacillus
1	1	S	1450761	Aneurinibacillus sp. XH2
56	0	G	1677050	Novibacillus
56	56	S	1471761	Novibacillus thermophilus
26	26	S	2490858	Thermoactinomycetaceae bacterium SCSIO 07575
6	0	G	292635	Laceyella
6	6	S	37482	Laceyella sacchari
3	0	G	2023	Thermoactinomyces
3	3	S	2026	Thermoactinomyces vulgaris
29	27	G	33986	Exiguobacterium
1	1	S	1224749	Exiguobacterium sp. ZWU0009
1	1	S	1849031	Exiguobacterium sp. U13-1
116	111	G	1301	Streptococcus
2	2	S	315405	Streptococcus gallolyticus
1	1	S	197614	Streptococcus pasteurianus
1	1	S	1335	Streptococcus equinus
1	0	S	102684	Streptococcus infantarius
1	0	S1	150054	Streptococcus infantarius subsp. infantarius
1	1	S2	1069533	Streptococcus infantarius subsp. infantarius CJ18
5	0	G	1357	Lactococcus
5	5	S	1363	Lactococcus garvieae
79	25	G	1350	Enterococcus
24	24	S	1352	Enterococcus faecium
15	15	S	1351	Enterococcus faecalis
4	4	S	1354	Enterococcus hirae
3	3	S	53346	Enterococcus mundtii
3	3	S	37734	Enterococcus casseliflavus
2	2	S	160453	Enterococcus gilvus
1	1	S	33945	Enterococcus avium
1	1	S	44008	Enterococcus cecorum
1	1	S	417368	Enterococcus thailandicus
45	12	G	1578	Lactobacillus
13	13	S	1622	Lactobacillus murinus
6	6	S	1604	Lactobacillus amylovorus
4	4	S	1579	Lactobacillus acidophilus
4	2	S	1598	Lactobacillus reuteri
2	0	S1	1273150	Lactobacillus reuteri 1063
2	2	S2	927703	Lactobacillus reuteri ATCC 53608
2	2	G1	655183	Lactobacillus casei group
2	2	S	33959	Lactobacillus johnsonii
1	1	S	1589	Lactobacillus pentosus
1	1	S	89059	Lactobacillus acidipiscis
18	0	G	1375	Aerococcus
18	18	S	51665	Aerococcus urinaeequi
2	2	G	1243	Leuconostoc
2	0	G	46255	Weissella
2	2	S	137591	Weissella cibaria
2	0	G	1470540	Jeotgalibaca
2	2	S	1903686	Jeotgalibaca sp. PTS2502
386	173	G	1485	Clostridium
96	96	S	1502	Clostridium perfringens
69	69	S	1491	Clostridium botulinum
15	15	S	1494	Clostridium cochlearium
13	13	S	1504	Clostridium septicum
10	10	S	1561	Clostridium baratii
3	3	S	1492	Clostridium butyricum
3	2	S	1542	Clostridium novyi
1	1	S1	386415	Clostridium novyi NT
2	2	S	1216932	Clostridium bornimense
1	1	S	182773	Clostridium isatidis
1	1	S	1509	Clostridium sporogenes
25	25	S	2082193	Clostridiaceae bacterium 14S0207
15	0	G	1663717	Herbinix
15	15	S	1679721	Herbinix luporum
9	3	G	572511	Blautia
3	0	S	1322	Blautia hansenii
3	3	S1	537007	Blautia hansenii DSM 20583
2	2	S	2479767	Blautia sp. SC05B48
1	1	S	33035	Blautia producta
7	0	S	39491	[Eubacterium] rectale
7	7	S1	515619	[Eubacterium] rectale ATCC 33656
4	0	G	207244	Anaerostipes
4	4	S	649756	Anaerostipes hadrus
4	0	G	2569097	Anaerobutyricum
4	4	S	39488	Anaerobutyricum hallii
2	0	G	841	Roseburia
2	0	S	166486	Roseburia intestinalis
2	2	S1	536231	Roseburia intestinalis L1-82
1	0	G	1506553	Lachnoclostridium
1	1	S	1871021	Lachnoclostridium phocaeense
38	0	G	2733	Symbiobacterium
38	0	S	2734	Symbiobacterium thermophilum
38	38	S1	292459	Symbiobacterium thermophilum IAM 14863
7	0	G	2304692	Hungateiclostridium
6	6	S	1677857	Hungateiclostridium saccincola
1	0	S	288965	Hungateiclostridium clariflavum
1	1	S1	720554	Hungateiclostridium clariflavum DSM 19732
2	0	G	2304691	Thermoclostridium
2	0	S	1510	Thermoclostridium stercorarium
2	0	S1	160385	Thermoclostridium stercorarium subsp. leptospartum
2	2	S2	1346611	Thermoclostridium stercorarium subsp. leptospartum DSM 9219
2	0	G	1870884	Clostridioides
2	0	S	1496	Clostridioides difficile
2	2	S1	499174	Clostridioides difficile QCD-23m63
1	0	G	186831	Acetoanaerobium
1	1	S	1511	Acetoanaerobium sticklandii
1	0	G	1849828	Paeniclostridium
1	1	S	1505	Paeniclostridium sordellii
2	0	G	1263	Ruminococcus
2	2	S	2564099	Ruminococcus sp. JE7A12
1	0	G	291988	Thermosediminibacter
1	0	S	291990	Thermosediminibacter oceani
1	1	S1	555079	Thermosediminibacter oceani DSM 16646
114	0	G	191303	Turicibacter
114	114	S	1712675	Turicibacter sp. H121
1	1	S	2109692	Erysipelotrichaceae bacterium GAM147
5	0	G	150022	Finegoldia
5	1	S	1260	Finegoldia magna
4	4	S1	334413	Finegoldia magna ATCC 29328
213	26	G	1742989	Glutamicibacter
165	0	S	256701	Glutamicibacter arilaitensis
165	165	S1	861360	Glutamicibacter arilaitensis Re117
19	19	S	37929	Glutamicibacter nicotianae
3	3	S	1933880	Glutamicibacter halophytocola
59	3	G	57493	Kocuria
39	39	S	71999	Kocuria palustris
15	15	S	1275	Kocuria rosea
2	2	S	446860	Kocuria flava
7	2	G	1663	Arthrobacter
2	2	S	37928	Arthrobacter crystallopoietes
2	2	S	2079227	Arthrobacter sp. PGP41
1	1	S	1357915	Arthrobacter sp. QXT-31
3	0	G	1269	Micrococcus
3	3	S	1270	Micrococcus luteus
1	0	G	32207	Rothia
1	1	S	43675	Rothia mucilaginosa
1	0	G	1160973	Auritidibacter
1	1	S	2170745	Auritidibacter sp. NML130574
90	41	G	1696	Brevibacterium
18	18	S	1703	Brevibacterium linens
18	18	S	273384	Brevibacterium aurantiacum
12	12	S	629680	Brevibacterium sandarakinum
1	1	S	2575923	Brevibacterium sp. CS2
46	16	G	43668	Brachybacterium
28	0	S	43669	Brachybacterium faecium
28	28	S1	446465	Brachybacterium faecium DSM 4810
1	1	S	1331682	Brachybacterium ginsengisoli
1	1	S	1903186	Brachybacterium sp. P6-10-X1
14	0	G	43673	Jonesia
14	14	S	43674	Jonesia denitrificans
12	0	G	57499	Kytococcus
12	0	S	1276	Kytococcus sedentarius
12	12	S1	478801	Kytococcus sedentarius DSM 20547
3	3	G	33882	Microbacterium
3	3	G	33886	Rathayibacter
2	0	G	55968	Leucobacter
2	2	S	1935379	Leucobacter sp. DSM 101948
2	0	G	337004	Microcella
2	2	S	279828	Microcella alkaliphila
161	50	G	1716	Corynebacterium
82	82	S	1705	Corynebacterium stationis
10	0	S	160386	Corynebacterium casei
10	10	S1	1285583	Corynebacterium casei LMG S-19264
5	5	S	1718	Corynebacterium glutamicum
5	5	S	43771	Corynebacterium urealyticum
3	3	S	1725	Corynebacterium xerosis
2	2	S	1697	Corynebacterium ammoniagenes
2	0	S	1727	Corynebacterium variabile
2	2	S1	858619	Corynebacterium variabile DSM 44702
1	1	S	43990	Corynebacterium segmentosum
1	0	S	349751	Corynebacterium marinum
1	1	S1	1224162	Corynebacterium marinum DSM 44953
13	0	G	1866885	Mycolicibacterium
9	9	S	1797	Mycolicibacterium thermoresistibile
2	1	S	1772	Mycolicibacterium smegmatis
1	1	S1	1214915	Mycolicibacterium smegmatis MKD8
2	0	S	46351	Mycolicibacterium hassiacum
2	2	S1	1122247	Mycolicibacterium hassiacum DSM 44199
10	3	G	1073531	Mycolicibacter
7	7	S	875328	Mycolicibacter sinensis
2	2	G	1763	Mycobacterium
21	18	G	1827	Rhodococcus
2	2	S	1302308	Rhodococcus sp. P1Y
1	1	S	38310	Rhodococcus coprophilus
2	1	G	37914	Dietzia
1	1	S	499555	Dietzia timorensis
92	1	G	1912216	Cutibacterium
91	91	S	1747	Cutibacterium acnes
5	0	G	72763	Tessaracoccus
3	3	S	1909732	Tessaracoccus sp. T2.5-30
1	1	S	399497	Tessaracoccus flavescens
1	1	S	1610493	Tessaracoccus flavus
11	2	G	1839	Nocardioides
8	8	S	110319	Nocardioides sp. CF8
1	1	S	196162	Nocardioides sp. JS614
57	51	G	2000	Streptosporangium
6	0	S	2001	Streptosporangium roseum
6	6	S1	479432	Streptosporangium roseum DSM 43021
7	0	G	83677	Thermobifida
7	0	S	2021	Thermobifida fusca
7	7	S1	269800	Thermobifida fusca YX
3	0	G	2013	Nocardiopsis
2	2	S	2014	Nocardiopsis dassonvillei
1	0	S	53437	Nocardiopsis alba
1	1	S1	1205910	Nocardiopsis alba ATCC BAA-2165
2	0	G	2019	Thermomonospora
2	0	S	2020	Thermomonospora curvata
2	2	S1	471852	Thermomonospora curvata DSM 43183
18	0	G	147067	Thermobispora
18	0	S	2006	Thermobispora bispora
18	18	S1	469371	Thermobispora bispora DSM 43833
11	10	G	1873	Micromonospora
1	1	S	479978	Micromonospora tulbaghiae
2	0	G	84593	Verrucosispora
2	0	S	1003110	Verrucosispora maris
2	2	S1	263358	Verrucosispora maris AB-18-032
16	15	G	1883	Streptomyces
1	0	S	1038928	Streptomyces xinghaiensis
1	1	S1	1038929	Streptomyces xinghaiensis S187
15	4	G	1678	Bifidobacterium
7	7	S	1683	Bifidobacterium angulatum
1	1	S	216816	Bifidobacterium longum
1	0	S	1686	Bifidobacterium catenulatum
1	0	S1	630129	Bifidobacterium catenulatum subsp. kashiwanohense
1	1	S2	1447716	Bifidobacterium kashiwanohense PV20-2
1	1	S	78344	Bifidobacterium gallinarum
1	1	S	1680	Bifidobacterium adolescentis
1	0	G	2701	Gardnerella
1	1	S	2702	Gardnerella vaginalis
2	0	G	88138	Modestobacter
2	2	S	477641	Modestobacter marinus
5	0	G	28263	Arcanobacterium
5	5	S	28264	Arcanobacterium haemolyticum
1	0	G	1522056	Flaviflexus
1	1	S	2496867	Flaviflexus sp. H23T48
2	0	G	1851	Saccharomonospora
1	0	S	40988	Saccharomonospora azurea
1	1	S1	882081	Saccharomonospora azurea NA-128
1	0	S	40990	Saccharomonospora glauca
1	1	S1	928724	Saccharomonospora glauca K62
4	0	G	102106	Collinsella
4	4	S	74426	Collinsella aerofaciens
4	0	G	133925	Olsenella
2	2	S	1805478	Olsenella sp. Marseille-P2300
1	1	S	604330	Olsenella umbonata
1	1	S	2109685	Olsenella sp. GAM18
251	0	G	2056	Sphaerobacter
251	0	S	2057	Sphaerobacter thermophilus
251	251	S1	479434	Sphaerobacter thermophilus DSM 20745
27	27	G	270	Thermus
1	0	G	1177	Nostoc
1	0	S	374162	Nostoc carneum
1	1	S1	1973483	Nostoc carneum NIES-2107
52	7	G	28453	Sphingobacterium
39	39	S	743722	Sphingobacterium sp. 21
4	4	S	1538644	Sphingobacterium sp. ML3W
2	2	S	1010	Sphingobacterium mizutaii
6	3	G	84567	Pedobacter
2	2	S	363852	Pedobacter ginsengisoli
1	1	S	2482728	Pedobacter sp. G11
18	15	G	59732	Chryseobacterium
3	3	S	254	Chryseobacterium indoltheticum
7	4	G	237	Flavobacterium
3	3	S	1306519	Flavobacterium commune
2	0	G	501783	Cloacibacterium
2	2	S	237258	Cloacibacterium normanense
1	0	G	76831	Myroides
1	0	S	256	Myroides odoratus
1	1	S1	929704	Myroides odoratus DSM 2801
3	0	G	398041	Flavisolibacter
3	3	S	2502779	Flavisolibacter sp. 17J28-1
7	3	G	816	Bacteroides
4	4	S	817	Bacteroides fragilis
4	0	G	1918540	Muribaculum
4	4	S	2530390	Muribaculum sp. TLL-A4
1	0	G	1784836	Fermentimonas
1	1	S	1562970	Fermentimonas caenicola
1	0	G	838	Prevotella
1	0	S	652716	Prevotella sp. oral taxon 299
1	1	S1	575614	Prevotella sp. oral taxon 299 str. F0039
1	0	G	319458	Leadbetterella
1	0	S	316068	Leadbetterella byssophila
1	1	S1	649349	Leadbetterella byssophila DSM 17132
1	0	G	2349	Haliscomenobacter
1	0	S	2350	Haliscomenobacter hydrossis
1	1	S1	760192	Haliscomenobacter hydrossis DSM 1100
10	1	G	810	Chlamydia
9	9	S	83560	Chlamydia muridarum
1	0	G	71666	Waddlia
1	0	S	71667	Waddlia chondrophila
1	1	S1	716544	Waddlia chondrophila WSU 86-1044
1	0	G	123	Pirellula
1	0	S	125	Pirellula staleyi
1	1	S1	530564	Pirellula staleyi DSM 6068
1	0	G	1961799	Lacunisphaera
1	1	S	1838286	Lacunisphaera limnophila
2	0	G	171	Leptospira
2	2	S	173	Leptospira interrogans
1	0	G	157	Treponema
1	1	S	158	Treponema denticola
2	0	G	848	Fusobacterium
1	1	S	859	Fusobacterium necrophorum
1	1	S	1583098	Fusobacterium hwasookii
2	0	G	68335	Coprothermobacter
2	0	S	35786	Coprothermobacter proteolyticus
2	2	S1	309798	Coprothermobacter proteolyticus DSM 5265
1	0	G	332162	Candidatus Solibacter
1	0	S	332163	Candidatus Solibacter usitatus
1	1	S1	234267	Candidatus Solibacter usitatus Ellin6076
Tot G=221 Tot S=433
*A rank code, indicating (U)nclassified, (D)omain, (K)ingdom, (P)hylum, (C)lass, (O)rder, (F)amily, (G)enus, or (S)pecies. All other ranks are simply filled with a dash.

## Sheet: F4_I_femur_bacteria
Number of reads covered by the clade rooted at this taxon	Number of reads assigned directly to this taxon	Rank code*	NCBI taxonomy ID	Indented scientific name
6468	5035	G	1301	Streptococcus
3130	558	G	29465	Veillonella
3072	2872	G	1883	Streptomyces
2539	2413	S	29466	Veillonella parvula
1808	724	G	724	Haemophilus
985	932	G	286	Pseudomonas
876	822	S	729	Haemophilus parainfluenzae
798	770	G	407	Methylobacterium
750	750	S	1302	Streptococcus gordonii
642	6	G	1912216	Cutibacterium
622	622	S	1747	Cutibacterium acnes
602	327	G	1386	Bacillus
518	419	G	482	Neisseria
469	286	G	1654	Actinomyces
310	145	G	838	Prevotella
290	177	G	848	Fusobacterium
255	45	G	32207	Rothia
248	191	G	13687	Sphingomonas
231	141	G	374	Bradyrhizobium
227	49	G	1279	Staphylococcus
213	103	G	1016	Capnocytophaga
210	7	G	1743	Propionibacterium
203	203	S	556499	Propionibacterium acidifaciens
184	176	S	1303	Streptococcus oralis
181	165	G	68287	Mesorhizobium
168	6	S	2047	Rothia dentocariosa
166	2	G	32067	Leptotrichia
162	162	S1	762948	Rothia dentocariosa ATCC 17931
148	148	S	712357	Leptotrichia sp. oral taxon 212
147	144	S	1305	Streptococcus sanguinis
140	140	S	544580	Actinomyces oris
128	122	S	28037	Streptococcus mitis
128	128	S	1280	Staphylococcus aureus
126	126	S1	1316254	Veillonella parvula HSIVP1
119	119	S	712310	Haemophilus sp. oral taxon 036
107	66	S	1398	Bacillus coagulans
103	103	S	1433513	Streptococcus sp. ChDC B345
74	74	S	726	Haemophilus haemolyticus
73	73	G	1234	Nitrospira
68	0	S	641148	Neisseria sp. oral taxon 014
68	68	S1	641149	Neisseria sp. oral taxon 014 str. F0314
63	0	S	1950	Streptomyces peucetius
63	0	S1	55158	Streptomyces peucetius subsp. caesius
63	63	S2	316280	Streptomyces peucetius subsp. caesius ATCC 27952
61	61	S	28131	Prevotella intermedia
61	61	S	28132	Prevotella melaninogenica
58	51	G1	86661	Bacillus cereus group
57	57	S	1313	Streptococcus pneumoniae
57	57	S	1017	Capnocytophaga gingivalis
56	0	G	357	Agrobacterium
56	0	G1	1183400	Agrobacterium tumefaciens complex
56	51	S	358	Agrobacterium tumefaciens
54	54	S1	862965	Haemophilus parainfluenzae T3T1
54	54	S	860	Fusobacterium periodonticum
51	27	G	469	Acinetobacter
49	22	S	1478	Bacillus simplex
49	0	G	47670	Lautropia
49	49	S	47671	Lautropia mirabilis
49	30	S	851	Fusobacterium nucleatum
47	0	G	1055323	Aeribacillus
47	47	S	33936	Aeribacillus pallidus
47	0	G	1485	Clostridium
47	47	S	1491	Clostridium botulinum
42	42	S	43675	Rothia mucilaginosa
41	41	S1	941639	Bacillus coagulans 2-6
40	14	G	1827	Rhodococcus
39	39	S	1940	Streptomyces albireticuli
38	23	G	1378	Gemella
38	26	S	152682	Sphingomonas melonis
35	35	S	1282	Staphylococcus epidermidis
34	0	G	475	Moraxella
34	34	S	34062	Moraxella osloensis
33	0	G	547	Enterobacter
33	0	G1	354276	Enterobacter cloacae complex
33	33	S	550	Enterobacter cloacae
32	0	G	106591	Ensifer
32	1	S	106592	Ensifer adhaerens
31	31	S	450367	[Brevibacterium] frigoritolerans
31	31	S1	1416753	Ensifer adhaerens OV14
31	0	G	469322	Steroidobacter
31	31	S	465721	Steroidobacter denitrificans
30	0	G	416916	Aggregatibacter
29	29	S	39778	Veillonella dispar
29	29	S	2057741	Bradyrhizobium sp. SK17
28	28	S	1274631	Bradyrhizobium icense
28	1	G	48736	Ralstonia
28	28	S	327575	Capnocytophaga leadbetteri
27	27	S1	1349754	Bacillus simplex NBRC 15720 = DSM 1321
27	12	S	732	Aggregatibacter aphrophilus
27	0	G	745	Pasteurella
27	0	S	747	Pasteurella multocida
27	27	S1	44283	Pasteurella multocida subsp. multocida
26	0	G	83618	Pseudoxanthomonas
26	0	S	314722	Pseudoxanthomonas suwonensis
26	26	S1	743721	Pseudoxanthomonas suwonensis 11-1
26	0	G	2357	Desulfomonile
26	0	S	2358	Desulfomonile tiedjei
26	26	S1	706587	Desulfomonile tiedjei DSM 6799
24	18	G	34072	Variovorax
23	0	G	1912217	Pseudopropionibacterium
23	23	S	1750	Pseudopropionibacterium propionicum
23	6	G	1716	Corynebacterium
23	0	G	2717	Cardiobacterium
23	23	S	2718	Cardiobacterium hominis
23	23	S	1019	Capnocytophaga sputigena
22	8	G	281472	Jiangella
22	12	G	150247	Anoxybacillus
21	15	G	44249	Paenibacillus
21	21	S	1415630	Pseudomonas sp. TKP
20	0	G	1734920	Pseudorhodoplanes
20	20	S	1235591	Pseudorhodoplanes sinuspersici
19	0	G	57495	Dermacoccus
19	19	S	1274	Dermacoccus nishinomiyaensis
19	17	G	40323	Stenotrophomonas
18	0	G	182639	Kribbella
18	0	S	182640	Kribbella flavida
18	18	S1	479435	Kribbella flavida DSM 17836
18	5	G1	136845	Pseudomonas putida group
17	10	G	970	Selenomonas
17	3	G	68	Lysobacter
17	0	G	963	Herbaspirillum
17	17	S	863372	Herbaspirillum huttiense
16	16	S	1535768	Streptomyces lunaelactis
16	0	G	1525371	Neorhizobium
16	2	S	399	Neorhizobium galegae
16	2	G	165695	Sphingobium
16	16	S	108980	Acinetobacter ursingii
16	16	S	305	Ralstonia solanacearum
16	0	G	2004797	Luteitalea
16	16	S	1855912	Luteitalea pratensis
15	15	S	1379	Gemella haemolysans
15	15	S	495	Neisseria elongata
15	11	G	106589	Cupriavidus
15	0	G	354354	Niastella
15	0	S	354356	Niastella koreensis
15	15	S1	700598	Niastella koreensis GR20-10
14	14	S	33011	Cutibacterium granulosum
14	0	S	649739	Actinomyces sp. oral taxon 848
14	14	S1	649743	Actinomyces sp. oral taxon 848 str. F0332
14	5	G	1763	Mycobacterium
14	7	G	1678	Bifidobacterium
14	14	S	1325090	Bradyrhizobium guangdongense
14	0	S1	323655	Neorhizobium galegae bv. orientalis
14	14	S2	1028800	Neorhizobium galegae bv. orientalis str. HAMBI 540
14	14	S	120107	Sphingobium cloacae
14	14	S	262324	Lysobacter gummosus
14	14	S1	76857	Fusobacterium nucleatum subsp. polymorphum
14	0	S	40542	Leptotrichia buccalis
14	14	S1	523794	Leptotrichia buccalis C-1013-b
13	6	G	1817	Nocardia
13	13	S	712624	Streptococcus sp. oral taxon 064
13	0	G1	671232	Streptococcus anginosus group
13	1	G	1578	Lactobacillus
13	0	S	31998	Methylobacterium radiotolerans
13	13	S1	426355	Methylobacterium radiotolerans JCM 2831
13	13	S	722472	Bradyrhizobium lablabi
13	0	S	39645	Mesorhizobium ciceri
13	13	S1	682633	Mesorhizobium ciceri ca181
13	7	S	303	Pseudomonas putida
13	0	G	2735	Verrucomicrobium
13	0	S	2736	Verrucomicrobium spinosum
13	13	S1	240016	Verrucomicrobium spinosum DSM 4136 = JCM 18804
12	0	G	33882	Microbacterium
12	12	S	47770	Lactobacillus crispatus
12	12	S	421767	Bacillus butanolivorans
12	12	S1	621456	Sphingomonas melonis TY
12	12	S1	985008	Aggregatibacter aphrophilus ATCC 33389
12	0	G	12916	Acidovorax
12	12	S	232721	Acidovorax sp. JS42
12	12	S	28129	Prevotella denticola
11	11	S	1889	Streptomyces ambofaciens
11	11	S	2049881	Streptomyces dengpaensis
11	11	S	1656	Actinomyces viscosus
11	11	S	43768	Corynebacterium matruchotii
11	11	S	419479	Jiangella alkaliphila
11	11	S	727	Haemophilus influenzae
11	11	S	105219	Ralstonia mannitolilytica
11	0	G	194	Campylobacter
11	11	S	199	Campylobacter concisus
11	11	S	1177574	Prevotella jejuni
10	10	S	1833	Rhodococcus erythropolis
10	2	G	379	Rhizobium
10	0	G	71	Simonsiella
10	0	S	72	Simonsiella muelleri
10	10	S1	641147	Simonsiella muelleri ATCC 29453
10	0	G	538	Eikenella
10	10	S	539	Eikenella corrodens
10	10	G	80865	Delftia
10	10	S	1583098	Fusobacterium hwasookii
9	0	S	33903	Streptomyces avermitilis
9	9	S1	227882	Streptomyces avermitilis MA-4680 = NBRC 14893
9	0	S	379067	Streptomyces bingchenggensis
9	9	S1	749414	Streptomyces bingchenggensis BCW-1
9	9	S	1283	Staphylococcus haemolyticus
9	0	G	39948	Dialister
9	9	S	39950	Dialister pneumosintes
9	0	G	44259	Filifactor
9	0	S	143361	Filifactor alocis
9	9	S1	546269	Filifactor alocis ATCC 35896
9	0	G	543311	Parvimonas
9	9	S	33033	Parvimonas micra
9	9	S	1889813	Anaerolineaceae bacterium oral taxon 439
9	0	G	29407	Rhodoplanes
9	9	S	674703	Rhodoplanes sp. Z2-YC6860
9	9	S	2219696	Sphingomonas sp. FARSPH
9	0	G	570	Klebsiella
9	0	S	573	Klebsiella pneumoniae
9	9	S1	72407	Klebsiella pneumoniae subsp. pneumoniae
9	9	S	490	Neisseria sicca
9	0	G	52972	Polaromonas
9	9	S	296591	Polaromonas sp. JS666
9	0	G	39643	Sorangium
9	0	S	56	Sorangium cellulosum
8	8	S	67304	Streptomyces griseorubiginosus
8	0	S	706438	Actinomyces sp. oral taxon 171
8	8	S1	706439	Actinomyces sp. oral taxon 171 str. F0337
8	8	S	904291	Microbacterium sediminis
8	0	G	133925	Olsenella
8	8	S	712411	Olsenella sp. oral taxon 807
8	8	S1	1077464	Streptococcus oralis subsp. tigurinus
8	8	S	1441095	Bacillus gobiensis
8	5	G	85413	Bosea
8	8	S	56730	Rhizobium gallicum
8	8	S1	448385	Sorangium cellulosum So ce56
8	8	S	28135	Prevotella oris
8	0	S	589437	Prevotella scopos
8	8	S1	1236518	Prevotella scopos JCM 17725
8	0	G	836	Porphyromonas
8	8	S	837	Porphyromonas gingivalis
7	7	S	45398	Streptomyces griseoviridis
7	7	S	2135430	Streptomyces sp. P3
7	1	G	57493	Kocuria
7	7	S	1824	Nocardia asteroides
7	0	G	2029	Kibdelosporangium
7	7	S	860235	Kibdelosporangium phytohabitans
7	7	G	1873	Micromonospora
7	0	S	33905	Bifidobacterium thermophilum
7	7	S1	1254439	Bifidobacterium thermophilum RBL67
7	0	G	191494	Conexibacter
7	0	S	191495	Conexibacter woesei
7	7	S1	469383	Conexibacter woesei DSM 14684
7	7	S	1338	Streptococcus intermedius
7	0	G	1357	Lactococcus
7	0	S	1358	Lactococcus lactis
7	7	S1	1359	Lactococcus lactis subsp. cremoris
7	7	S	713030	Selenomonas sp. oral taxon 136
7	7	S	1961362	Sphingomonas sp. NIC1
7	0	G1	136843	Pseudomonas fluorescens group
7	7	S	75612	Pseudomonas mandelii
7	7	S	40216	Acinetobacter radioresistens
7	1	G	338	Xanthomonas
7	7	S	2010829	Rhodanobacteraceae bacterium Dysh456
7	7	S	2080469	Zoogloeaceae bacteirum Par-f-2
6	6	S	71999	Kocuria palustris
6	0	G	367298	Phycicoccus
6	6	S	443156	Phycicoccus dokdonensis
6	0	S	29311	Mycobacterium haemophilum
6	6	S1	1202450	Mycobacterium haemophilum DSM 44634
6	0	S	161879	Corynebacterium kroppenstedtii
6	6	S1	645127	Corynebacterium kroppenstedtii DSM 44385
6	0	G	283810	Stackebrandtia
6	0	S	283811	Stackebrandtia nassauensis
6	6	S1	446470	Stackebrandtia nassauensis DSM 44728
6	6	S1	246201	Streptococcus mitis NCTC 12261
6	6	S	1328	Streptococcus anginosus
6	6	S	1343	Streptococcus vestibularis
6	6	S	78535	Streptococcus viridans
6	6	S	1335	Streptococcus equinus
6	6	S	294699	Anoxybacillus amylolyticus
6	6	S	29388	Staphylococcus capitis
6	0	S	143393	[Eubacterium] sulci
6	6	S1	888727	Eubacterium sulci ATCC 35585
6	6	S	2051553	Methylobacterium currus
6	0	G	28100	Phyllobacterium
6	6	S	1867719	Phyllobacterium zundukense
6	6	S1	1331671	Pseudomonas putida H8234
6	6	S	339	Xanthomonas campestris
6	6	S	28449	Neisseria subflava
6	0	S	34073	Variovorax paradoxus
6	6	S1	543728	Variovorax paradoxus S110
6	0	G	157	Treponema
6	6	S	158	Treponema denticola
5	5	G	1839	Nocardioides
5	5	S	712122	Actinomyces sp. oral taxon 414
5	0	G	1696	Brevibacterium
5	5	S	273384	Brevibacterium aurantiacum
5	5	S	1990687	Rhodococcus sp. S2-17
5	5	S	1805827	Rhodococcus sp. MTM3W5.2
5	0	G	2053	Gordonia
5	0	S	2054	Gordonia bronchialis
5	5	S1	526226	Gordonia bronchialis DSM 43247
5	0	S	257758	Streptococcus pseudopneumoniae
5	5	S1	1054460	Streptococcus pseudopneumoniae IS7493
5	5	S	1349	Streptococcus uberis
5	5	S	113107	Streptococcus australis
5	0	G	1350	Enterococcus
5	5	S	2420313	Enterococcus sp. FDAARGOS_553
5	0	S	1405	Bacillus mycoides
5	5	S1	315730	Bacillus mycoides KBAB4
5	5	S	1404	Bacillus megaterium
5	5	S	228899	Bacillus asahii
5	5	G	129337	Geobacillus
5	4	G	270	Thermus
5	0	G	449972	Chelativorans
5	5	S	266779	Chelativorans sp. BNC1
5	5	S1	311403	Agrobacterium radiobacter K84
5	0	G	556257	Pseudolabrys
5	5	S	2562284	Pseudolabrys sp. FHR47
5	0	G	125216	Roseomonas
5	5	S	2018065	Roseomonas sp. FDAARGOS_362
5	0	G	106633	Thioalkalivibrio
5	0	S	1033854	Thioalkalivibrio sulfidiphilus
5	5	S1	396588	Thioalkalivibrio sulfidiphilus HL-EbGr7
5	4	G	816	Bacteroides
5	0	G	195950	Tannerella
5	5	S1	76859	Fusobacterium nucleatum subsp. animalis
4	4	S	193462	Streptomyces niveus
4	4	S	38300	Streptomyces pristinaespiralis
4	4	S	2282738	Streptomyces sp. GSSD-12
4	4	S	1852377	Actinomyces pacaensis
4	0	G	1269	Micrococcus
4	4	S	1270	Micrococcus luteus
4	4	S	37919	Rhodococcus opacus
4	4	G	2000	Streptosporangium
4	0	S	33934	Anoxybacillus flavithermus
4	4	S1	491915	Anoxybacillus flavithermus WK1
4	0	S	44251	Paenibacillus durus
4	4	S1	1333534	Paenibacillus durus ATCC 35681
4	4	S	248315	Veillonella rodentium
4	4	S	270351	Methylobacterium aquaticum
4	4	S	1437360	Bradyrhizobium erythrophlei
4	0	G	28105	Sinorhizobium
4	0	G1	663276	Sinorhizobium fredii group
4	4	S	380	Sinorhizobium fredii
4	4	S	249188	Haemophilus pittmaniae
4	4	S	1338689	Pseudomonas sp. JY-Q
4	0	G	551	Erwinia
4	4	S	1619313	Erwinia gerundensis
4	1	G	53335	Pantoea
4	2	S	106590	Cupriavidus necator
4	3	G	507	Alcaligenes
4	4	S	76123	Prevotella enoeca
4	4	G	308865	Elizabethkingia
3	3	S	1915	Streptomyces lincolnensis
3	0	G1	120793	Mycobacterium avium complex (MAC)
3	3	S	222805	Mycobacterium chimaera
3	3	S	1798224	Jiangella sp. DSM 45060
3	3	S1	388919	Streptococcus sanguinis SK36
3	3	S	1479019	Methylobacterium sp. C1
3	3	S	1867715	Bosea sp. Tri-49
3	3	S	2493677	Mesorhizobium sp. M6A.T.Cr.TU.016.01.1.1
3	0	S	397260	Sphingomonas sanxanigenens
3	3	S1	1123269	Sphingomonas sanxanigenens DSM 19645 = NX02
3	3	S1	634176	Aggregatibacter aphrophilus NJ8700
3	0	S	739	Aggregatibacter segnis
3	3	S1	888057	Aggregatibacter segnis ATCC 33393
3	0	G1	1654067	Pantoea agglomerans group
3	3	S	549	Pantoea agglomerans
3	0	G	2034504	Sulfurivermis
3	3	S	1972068	Sulfurivermis fontis
3	0	G	1237	Piscirickettsia
3	3	S	1238	Piscirickettsia salmonis
3	0	G	201096	Alicycliphilus
3	3	S	179636	Alicycliphilus denitrificans
3	3	S	28112	Tannerella forsythia
3	3	G	237	Flavobacterium
3	0	G	120831	Dyadobacter
3	0	S	94254	Dyadobacter fermentans
3	3	S1	471854	Dyadobacter fermentans DSM 18053
3	0	G	1433993	Chryseolinea
3	3	S	2321403	Chryseolinea sp. KIS68-18
2	2	S	1783515	Streptomyces qaidamensis
2	2	S	47763	Streptomyces lydicus
2	2	G	2529408	Schaalia
2	2	G	1663	Arthrobacter
2	2	S	36805	Microbacterium aurum
2	2	S	82380	Microbacterium oxydans
2	0	G	1866885	Mycolicibacterium
2	2	S	1797	Mycolicibacterium thermoresistibile
2	0	S	1828	Rhodococcus fascians
2	2	S1	1051973	Rhodococcus fascians D188
2	0	G	83681	Nonomuraea
2	2	S	1909395	Nonomuraea sp. ATCC 55076
2	0	G	1747770	Egibacter
2	2	S	1670831	Egibacter rhizosphaerae
2	2	S	1462996	Paenibacillus yonginensis
2	0	G	2056	Sphaerobacter
2	0	S	2057	Sphaerobacter thermophilus
2	2	S1	479434	Sphaerobacter thermophilus DSM 20745
2	2	S	418223	Methylobacterium phyllosphaerae
2	2	S	1355477	Bradyrhizobium diazoefficiens
2	0	G1	136846	Pseudomonas stutzeri group
2	0	G2	578833	Pseudomonas stutzeri subgroup
2	0	S	316	Pseudomonas stutzeri
2	2	S1	1123519	Pseudomonas stutzeri DSM 10701
2	0	G1	995085	Stenotrophomonas maltophilia group
2	2	S	40324	Stenotrophomonas maltophilia
2	2	G	642	Aeromonas
2	2	S1	381666	Cupriavidus necator H16
2	0	G	32008	Burkholderia
2	2	G	202907	Collimonas
2	2	S	712710	Tannerella sp. oral taxon HOT-286
2	2	S	1705617	Capnocytophaga sp. oral taxon 323
2	2	S	1785996	Leptotrichia sp. oral taxon 847
1	1	S	2083284	Streptomyces sp. CB09001
1	1	S	2081702	Actinomyces sp. oral taxon 897
1	0	G	1742993	Pseudarthrobacter
1	0	S	361575	Pseudarthrobacter phenanthrenivorans
1	1	S1	930171	Pseudarthrobacter phenanthrenivorans Sphe3
1	1	G	1865	Actinoplanes
1	1	S	712633	Streptococcus sp. oral taxon 431
1	1	S	1316408	Streptococcus sp. HSISM1
1	1	S	1759399	Streptococcus sp. A12
1	0	G1	119603	Streptococcus dysgalactiae group
1	0	S	1334	Streptococcus dysgalactiae
1	0	S1	119602	Streptococcus dysgalactiae subsp. equisimilis
1	1	S2	617121	Streptococcus dysgalactiae subsp. equisimilis RE378
1	1	S	33040	Streptococcus milleri
1	1	G	1243	Leuconostoc
1	1	S	1396	Bacillus cereus
1	0	S	1428	Bacillus thuringiensis
1	0	S1	180854	Bacillus thuringiensis serovar huazhongensis
1	1	S2	527030	Bacillus thuringiensis serovar huazhongensis BGSC 4BD1
1	0	G	160795	Ureibacillus
1	1	S	51173	Ureibacillus thermosphaericus
1	0	S	76124	[Eubacterium] minutum
1	1	S1	888721	Eubacterium minutum ATCC 700079
1	0	G	86331	Mogibacterium
1	1	S	114527	Mogibacterium diversum
1	1	S	274	Thermus thermophilus
1	1	G	165697	Sphingopyxis
1	1	S	198620	Pseudomonas koreensis
1	1	S	28090	Acinetobacter lwoffii
1	0	G	579	Kluyvera
1	1	S	61648	Kluyvera intermedia
1	0	G	413435	Solimonas
1	1	S	2303331	Solimonas sp. K1W22B-7
1	1	S	487	Neisseria meningitidis
1	0	G	47420	Hydrogenophaga
1	1	S	2184519	Hydrogenophaga sp. NH-16
1	1	G1	87882	Burkholderia cepacia complex
1	0	G1	111527	pseudomallei group
1	1	S	342113	Burkholderia oklahomensis
1	1	S	511	Alcaligenes faecalis
1	1	S1	1254432	Sorangium cellulosum So0157-2
1	0	G	898	Desulfomicrobium
1	0	S	132132	Desulfomicrobium orale
1	1	S1	888061	Desulfomicrobium orale DSM 12838
1	1	S	821	Bacteroides vulgatus
1	0	G	79328	Chitinophaga
1	1	S	2033437	Chitinophaga sp. MD30
1	0	G	466152	Singulisphaera
1	0	S	466153	Singulisphaera acidiphila
1	1	S1	886293	Singulisphaera acidiphila DSM 18658
1	1	S	2572087	TM7 phylum sp. oral taxon 955
1	1	S	1540872	Candidatus Gracilibacteria bacterium HOT-871
Tot G=149 Tot S=307
*A rank code, indicating (U)nclassified, (D)omain, (K)ingdom, (P)hylum, (C)lass, (O)rder, (F)amily, (G)enus, or (S)pecies. All other ranks are simply filled with a dash.

## Sheet: F4_I_virus
Number of reads covered by the clade rooted at this taxon	Number of reads assigned directly to this taxon	Rank code*	NCBI taxonomy ID	Indented scientific name
104	0	S	45617	Human endogenous retrovirus K
104	104	S1	166122	Human endogenous retrovirus K113
1	0	G	153135	Gammaretrovirus
1	0	S	39746	Hardy-Zuckerman feline sarcoma virus
1	1	S1	11777	Feline sarcoma virus (STRAIN HARDY-ZUCKERMAN 4)
20	0	G	1921122	Nonanavirus
20	0	G1	2315205	unclassified Nonanavirus
20	20	S	1969841	Proteus phage VB_PmiS-Isfahan
3	0	G	680116	Spbetavirus
3	0	G1	1732062	unclassified Spbetalikevirus
3	3	S	1732063	Staphylococcus phage SPbeta-like
2	2	G	186765	Lambdavirus
1	0	G	140410	Peduovirus
1	0	G1	2563343	unclassified Peduovirus
1	1	S	1567486	Enterobacteria phage P88
2	0	G	1805626	Pithovirus
2	2	S	1450746	Pithovirus sibericum
Tot G=9 Tot S=8
*A rank code, indicating (U)nclassified, (D)omain, (K)ingdom, (P)hylum, (C)lass, (O)rder, (F)amily, (G)enus, or (S)pecies. All other ranks are simply filled with a dash.

## Sheet: F4_I_femur_virus
Number of reads covered by the clade rooted at this taxon	Number of reads assigned directly to this taxon	Rank code*	NCBI taxonomy ID	Indented scientific name
11	11	S	644007	Streptococcus phage PH10
8	8	S	1566990	Streptococcus phage SpSL1
20	0	G	1921122	Nonanavirus
20	0	G1	2315205	unclassified Nonanavirus
20	20	S	1969841	Proteus phage VB_PmiS-Isfahan
24	0	S	45617	Human endogenous retrovirus K
24	24	S1	166122	Human endogenous retrovirus K113
1	1	G	10405	Orthohepadnavirus
Tot G=3 Tot S=5
*A rank code, indicating (U)nclassified, (D)omain, (K)ingdom, (P)hylum, (C)lass, (O)rder, (F)amily, (G)enus, or (S)pecies. All other ranks are simply filled with a dash.

## Sheet: F4_I_protozoa
Number of reads covered by the clade rooted at this taxon	Number of reads assigned directly to this taxon	Rank code*	NCBI taxonomy ID	Indented scientific name
20635	0	G	5810	Toxoplasma
20635	0	S	5811	Toxoplasma gondii
20635	20635	S1	508771	Toxoplasma gondii ME49
240	6	G	5820	Plasmodium
193	0	G1	418103	Plasmodium (Plasmodium)
193	193	S	5855	Plasmodium vivax
41	41	S	208452	Plasmodium coatneyi
1	0	G	5658	Leishmania
1	0	G1	38568	Leishmania
1	0	G2	38582	Leishmania mexicana species complex
1	0	S	5665	Leishmania mexicana
1	1	S1	929439	Leishmania mexicana MHOM/GT/2001/U1103
1	0	G	5782	Dictyostelium
1	0	S	44689	Dictyostelium discoideum
1	1	S1	352472	Dictyostelium discoideum AX4
Tot G=7 Tot S=8
*A rank code, indicating (U)nclassified, (D)omain, (K)ingdom, (P)hylum, (C)lass, (O)rder, (F)amily, (G)enus, or (S)pecies. All other ranks are simply filled with a dash.

## Sheet: F4_I_femur_protozoa
Number of reads covered by the clade rooted at this taxon	Number of reads assigned directly to this taxon	Rank code*	NCBI taxonomy ID	Indented scientific name
6338	0	G	5810	Toxoplasma
6338	0	S	5811	Toxoplasma gondii
6338	6338	S1	508771	Toxoplasma gondii ME49
52	0	G	5820	Plasmodium
36	0	G1	418103	Plasmodium (Plasmodium)
36	36	S	5855	Plasmodium vivax
12	12	S	208452	Plasmodium coatneyi
4	1	G1	418101	Plasmodium (Vinckeia)
3	0	S	5825	Plasmodium chabaudi
3	3	S1	31271	Plasmodium chabaudi chabaudi
25	0	G	5690	Trypanosoma
25	0	G1	39700	Trypanozoon
25	0	S	5691	Trypanosoma brucei
25	0	S1	31285	Trypanosoma brucei gambiense
25	25	S2	679716	Trypanosoma brucei gambiense DAL972
Tot G=6 Tot S=9
*A rank code, indicating (U)nclassified, (D)omain, (K)ingdom, (P)hylum, (C)lass, (O)rder, (F)amily, (G)enus, or (S)pecies. All other ranks are simply filled with a dash.
