# Supplementary material for: First Glimpse into the Genomic Characterization of People from the Imperial Roman Community of Casal Bertone (Rome, First–Third Centuries AD)
Source: Genes (Basel). 2022 Jan 13;13(1):136. doi: 10.3390/genes13010136 (PMC8774527; doi:10.3390/genes13010136)
Supplement: Supplementary file 1 [file genes-13-00136-s001.zip › Supplementary Table S6.xlsx]

## Sheet: T9_bacteria
Supplementary Table S6: Microbial findings forT9 and F9
Number of reads covered by the clade rooted at this taxon	Number of reads assigned directly to this taxon	Rank code*	NCBI taxonomy ID	Indented scientific name
702	659	G	1883	Streptomyces
154	154	S	1747	Cutibacterium acnes
136	136	S	266779	Chelativorans sp. BNC1
158	127	G	286	Pseudomonas
169	121	G	1386	Bacillus
67	59	G	469	Acinetobacter
93	54	G	44249	Paenibacillus
53	53	S	1491	Clostridium botulinum
43	43	S	511	Alcaligenes faecalis
79	39	G	106589	Cupriavidus
55	34	G	270	Thermus
31	31	S	374606	Aminobacter sp. MSH1
25	25	S	121292	Pseudarthrobacter sulfonivorans
82	25	G	1485	Clostridium
37	25	S	106590	Cupriavidus necator
37	25	G	1234	Nitrospira
24	24	G	1301	Streptococcus
34	23	G	1873	Micromonospora
23	23	S	465721	Steroidobacter denitrificans
66	23	G	507	Alcaligenes
20	20	S1	1123519	Pseudomonas stutzeri DSM 10701
45	19	G	1279	Staphylococcus
18	18	S	481743	Paenibacillus sp. Y412MC10
24	15	G	1827	Rhodococcus
14	14	S	255247	Fictibacillus arsenicus
15	14	S	274	Thermus thermophilus
14	14	S	339	Xanthomonas campestris
28	13	G	1839	Nocardioides
20	13	G	32008	Burkholderia
12	12	S	450367	[Brevibacterium] frigoritolerans
12	12	S	382	Sinorhizobium meliloti
12	12	S1	706587	Desulfomonile tiedjei DSM 6799
12	12	S	42253	Nitrospira moscoviensis
20	11	G	374	Bradyrhizobium
10	10	S	47872	Micromonospora purpureochromogenes
11	10	G	129337	Geobacillus
10	10	S	1282	Staphylococcus epidermidis
10	10	S	2496265	Jeotgalibaca sp. H21T32
9	9	S	1535768	Streptomyces lunaelactis
165	9	G	1912216	Cutibacterium
9	9	S1	1300347	Nocardioides dokdonensis FR1436
9	9	S	2202249	Streptosporangium sp. 'caverna'
9	9	S	64104	Bacillus pseudomycoides
9	9	S1	1288971	[Clostridium] ultunense Esp
9	9	S	56730	Rhizobium gallicum
9	9	S	34062	Moraxella osloensis
23	9	G	338	Xanthomonas
9	9	S	296591	Polaromonas sp. JS666
8	8	S1	227882	Streptomyces avermitilis MA-4680 = NBRC 14893
8	8	S	1870819	Paenibacillus sp. BIHB4019
8	8	S	1712675	Turicibacter sp. H121
8	8	G	68287	Mesorhizobium
8	8	S1	381666	Cupriavidus necator H16
8	8	S	1855912	Luteitalea pratensis
15	7	G	1716	Corynebacterium
7	7	S	29385	Staphylococcus saprophyticus
7	7	S1	1416753	Ensifer adhaerens OV14
12	7	G1	1344959	Citrobacter freundii complex
6	6	S	1841249	Streptomyces sp. RTd22
6	6	S	260554	Bacillus halotolerans
6	6	S	407035	Salinicoccus halodurans
6	6	S	1471761	Novibacillus thermophilus
6	6	S	456163	Thermus parvatiensis
39	6	G	31988	Aminobacter
6	6	S	33050	Sphingopyxis macrogoltabida
5	5	S	110319	Nocardioides sp. CF8
7	5	S	37919	Rhodococcus opacus
7	5	G	1663	Arthrobacter
7	5	G	1696	Brevibacterium
5	5	S	79880	Bacillus clausii
5	5	S	528191	Paenibacillus xylanexedens
7	5	G	1578	Lactobacillus
5	5	S	271865	Ochrobactrum sp. A44
5	5	S	546	Citrobacter freundii
6	5	G	613	Serratia
5	5	S	1458426	Serpentinomonas mccroryi
11	5	G	914	Nitrosomonas
4	4	S	2496836	Streptomyces sp. MK-45
4	4	S	1940	Streptomyces albireticuli
4	4	S1	749414	Streptomyces bingchenggensis BCW-1
4	4	S	1797	Mycolicibacterium thermoresistibile
4	4	G	1817	Nocardia
4	4	S1	1121353	Corynebacterium callunae DSM 20147
4	4	S	211114	Allokutzneria albata
4	4	S	1536774	Paenibacillus sp. FSL H7-0357
4	4	S	2509675	Ktedonobacterales bacterium SCAWS-G2
4	4	S	1437360	Bradyrhizobium erythrophlei
4	4	S	1325090	Bradyrhizobium guangdongense
4	4	S	287	Pseudomonas aeruginosa
4	4	S	300	Pseudomonas mendocina
4	4	S1	1042878	Cupriavidus necator N-1
5	4	S	34073	Variovorax paradoxus
4	4	S	44577	Nitrosomonas ureae
4	4	S1	378806	Stigmatella aurantiaca DW4/3-1
4	4	S1	929704	Myroides odoratus DSM 2801
3	3	S	1792	Mycolicibacterium chitae
3	3	S1	1354275	Mycolicibacterium vaccae 95051
3	3	S1	443218	Hoyosella subflava DQS3-9A1
3	3	S	1705	Corynebacterium stationis
6	3	G	1742989	Glutamicibacter
3	3	S1	861360	Glutamicibacter arilaitensis Re117
3	3	S1	269800	Thermobifida fusca YX
3	3	S	1683	Bifidobacterium angulatum
3	3	S	1397	Bacillus circulans
3	3	S	1536769	Paenibacillus sp. FSL P4-0081
3	3	S1	358681	Brevibacillus brevis NBRC 100599
3	3	S	45972	Staphylococcus pasteuri
3	3	S	29382	Staphylococcus cohnii
3	3	S	2026	Thermoactinomyces vulgaris
3	3	G	1375	Aerococcus
3	3	S	1502	Clostridium perfringens
3	3	S	384	Rhizobium leguminosarum
3	3	S	1736675	Devosia sp. A16
3	3	S1	279238	Novosphingobium aromaticivorans DSM 12444
3	3	S	1697053	Oblitimonas alkaliphila
3	3	S	28090	Acinetobacter lwoffii
15	3	G	544	Citrobacter
3	3	S	262324	Lysobacter gummosus
3	3	S	672	Vibrio vulnificus
3	3	S	164546	Cupriavidus taiwanensis
3	3	S	2026199	Paraburkholderia aromaticivorans
3	3	S	96773	Thauera chlorobenzoica
3	3	S	297	Hydrogenophilus thermoluteolus
3	3	S	1211326	Spirosoma aerolatum
3	3	S	1010	Sphingobacterium mizutaii
2	2	S	2135430	Streptomyces sp. P3
2	2	S2	316280	Streptomyces peucetius subsp. caesius ATCC 27952
2	2	S	33011	Cutibacterium granulosum
2	2	S	399497	Tessaracoccus flavescens
2	2	S1	1214915	Mycolicibacterium smegmatis MKD8
2	2	S	1804	Mycolicibacterium gilvum
2	2	S1	543736	Rhodococcus opacus PD630
2	2	S	1805827	Rhodococcus sp. MTM3W5.2
2	2	S1	1112204	Gordonia polyisoprenivorans VH2
27	2	G	1742993	Pseudarthrobacter
2	2	S	1806905	Arthrobacter sp. ZXY-2
2	2	S	1703	Brevibacterium linens
2	2	G	33877	Agromyces
2	2	S1	471857	Saccharomonospora viridis DSM 43017
2	2	S	31958	Amycolatopsis orientalis
2	2	S	74426	Collinsella aerofaciens
12	2	G1	86661	Bacillus cereus group
2	2	S	666686	Bacillus sp. 1NLA3E
2	2	S	1581038	Bacillus sp. FJAT-22090
2	2	S	1465	Brevibacillus laterosporus
2	2	S	1290	Staphylococcus hominis
2	2	S	51173	Ureibacillus thermosphaericus
2	2	S	47770	Lactobacillus crispatus
2	2	S	83263	Aminobacter aminovorans
15	2	G	28105	Sinorhizobium
9	2	S	106592	Ensifer adhaerens
14	2	G	379	Rhizobium
4	2	G	357	Agrobacterium
2	2	S	358	Agrobacterium tumefaciens
2	2	S	674703	Rhodoplanes sp. Z2-YC6860
2	2	G	407	Methylobacterium
2	2	S	1235591	Pseudorhodoplanes sinuspersici
2	2	S	1673076	Sphingobium hydrophobicum
2	2	S	1415630	Pseudomonas sp. TKP
2	2	G	497	Psychrobacter
2	2	S1	180957	Pectobacterium carotovorum subsp. brasiliense
6	2	G	68	Lysobacter
4	2	G	40323	Stenotrophomonas
2	2	S	40324	Stenotrophomonas maltophilia
2	2	G	445	Legionella
2	2	S	28450	Burkholderia pseudomallei
2	2	S	1705310	Burkholderia sp. IDO3
2	2	S	1007105	Pusillimonas sp. T7-7
11	2	G	52972	Polaromonas
9	2	G	34072	Variovorax
2	2	S	436515	Variovorax boronicumulans
2	2	G	80865	Delftia
2	2	G	202907	Collimonas
2	2	S	153948	Nitrosomonas sp. AL212
2	2	S	927083	Sandaracinus amylolyticus
2	2	S	443143	Geobacter sp. M18
2	2	S	237258	Cloacibacterium normanense
7	2	G	816	Bacteroides
2	2	S	2528203	Bacteroides sp. A1C1
2	2	S	2321403	Chryseolinea sp. KIS68-18
2	2	S	851	Fusobacterium nucleatum
1	1	S1	653045	Streptomyces violaceusniger Tu 4113
1	1	S	2305220	Streptomyces sp. W1SF4
1	1	S	54571	Streptomyces venezuelae
1	1	S	2202000	Streptomyces sp. NEAU-S7GS2
1	1	S	1909732	Tessaracoccus sp. T2.5-30
1	1	S	2518370	Nocardioides sp. MMS17-SY117
1	1	S1	479435	Kribbella flavida DSM 17836
1	1	S1	710685	Mycolicibacterium rhodesiae NBB3
2	1	G	1763	Mycobacterium
1	1	S	1682113	Mycobacterium sp. YC-RL4
1	1	S	875328	Mycolicibacter sinensis
1	1	S	43990	Corynebacterium segmentosum
1	1	S	1004901	Gordonia iterans
1	1	S	1270	Micrococcus luteus
1	1	G	32207	Rothia
1	1	S	71999	Kocuria palustris
1	1	S1	446465	Brachybacterium faecium DSM 4810
1	1	S	1331682	Brachybacterium ginsengisoli
1	1	S1	471853	Beutenbergia cavernae DSM 12333
1	1	S1	446469	Sanguibacter keddieii DSM 10542
1	1	S	47857	Micromonospora echinaurantiaca
10	1	G	2000	Streptosporangium
4	1	G	1851	Saccharomonospora
1	1	S1	928724	Saccharomonospora glauca K62
3	1	G	1813	Amycolatopsis
1	1	G	1847	Pseudonocardia
1	1	S	1586287	Lentzea guizhouensis
1	1	S	216816	Bifidobacterium longum
1	1	G	53460	Nakamurella
1	1	G	42255	Rubrobacter
1	1	S1	526973	Bacillus cereus m1293
1	1	S1	1349754	Bacillus simplex NBRC 15720 = DSM 1321
1	1	S1	1196031	Bacillus oceanisediminis 2691
1	1	S1	1246626	Bacillus lehensis G1
1	1	S	35841	Bacillus thermoamylovorans
1	1	S1	545693	Bacillus megaterium QM B1551
1	1	S	86665	Bacillus halodurans
15	1	G	1329200	Fictibacillus
1	1	S	33940	Geobacillus thermodenitrificans
1	1	S	2052660	Oceanobacillus sp. 160
1	1	S	2169540	Lysinibacillus sp. 2017
1	1	S	386490	Terribacillus goriensis
1	1	S	33936	Aeribacillus pallidus
1	1	S	1406	Paenibacillus polymyxa
6	1	G	55080	Brevibacillus
1	1	S1	717605	Thermobacillus composti KWC4
1	1	S	1283	Staphylococcus haemolyticus
1	1	S	76853	Solibacillus silvestris
1	1	G	2747	Carnobacterium
1	1	S	1583	Weissella confusa
1	1	S	137591	Weissella cibaria
1	1	S	1494	Clostridium cochlearium
1	1	S1	515619	[Eubacterium] rectale ATCC 33656
1	1	S	649756	Anaerostipes hadrus
1	1	S	2173034	Clostridiales bacterium 70B-A
1	1	S	853	Faecalibacterium prausnitzii
1	1	S1	292459	Symbiobacterium thermophilum IAM 14863
1	1	S1	334413	Finegoldia magna ATCC 29328
1	1	S1	1192197	Pelosinus fermentans JBW45
1	1	S	484770	Pelosinus sp. UFO1
1	1	S1	762633	Thermus thermophilus SG0.5JP17-16
1	1	S	1274631	Bradyrhizobium icense
1	1	S	709797	Bradyrhizobiaceae bacterium SG-6C
1	1	S1	1128330	Sinorhizobium fredii CCBAU 25509
1	1	G	2282523	Methylorubrum
1	1	S	655015	Methylocystis bryophila
1	1	S	158500	Novosphingobium resinovorum
1	1	S	13690	Sphingobium yanoikuyae
1	1	S	2219696	Sphingomonas sp. FARSPH
1	1	G1	136843	Pseudomonas fluorescens group
1	1	S	29430	Acinetobacter haemolyticus
1	1	S	40214	Acinetobacter johnsonii
1	1	S	40215	Acinetobacter junii
1	1	S	2136182	Acinetobacter cumulans
1	1	S	471	Acinetobacter calcoaceticus
1	1	S1	72407	Klebsiella pneumoniae subsp. pneumoniae
1	1	S1	59201	Salmonella enterica subsp. enterica
1	1	S	61652	Serratia rubidaea
2	1	G	53335	Pantoea
1	1	S	553	Pantoea ananatis
1	1	S	84531	Lysobacter antibioticus
1	1	S	676208	Candidatus Rickettsiella viridis
1	1	S	2498451	Rheinheimera sp. LHK132
1	1	G	59753	Alcanivorax
1	1	G	642	Aeromonas
1	1	S1	44283	Pasteurella multocida subsp. multocida
1	1	S	57975	Burkholderia thailandensis
1	1	S	1855726	Burkholderia sp. KK1
1	1	S	1804984	Burkholderia sp. OLGA172
1	1	S	134537	Paraburkholderia fungorum
3	1	G	48736	Ralstonia
1	1	S	305	Ralstonia solanacearum
1	1	S	190721	Ralstonia insidiosa
1	1	G	222	Achromobacter
1	1	S	463025	Bordetella bronchialis
1	1	S	90245	Oligella urethralis
1	1	S1	1036672	Advenella kashmirensis WT001
1	1	S1	1246301	Variovorax paradoxus B4
2	1	G	47420	Hydrogenophaga
1	1	S	1842537	Hydrogenophaga sp. RAC07
1	1	S	232721	Acidovorax sp. JS42
2	1	G	12960	Azoarcus
1	1	S	748247	Azoarcus sp. KH32C
1	1	S1	76114	Aromatoleum aromaticum EbN1
1	1	G	482	Neisseria
1	1	G	32	Myxococcus
1	1	S	56	Sorangium cellulosum
1	1	S1	663365	Arcobacter suis CECT 7833
5	1	G	76831	Myroides
1	1	S	1306519	Flavobacterium commune
1	1	S	1729720	Salegentibacter sp. T436
1	1	S	817	Bacteroides fragilis
1	1	S	821	Bacteroides vulgatus
1	1	S1	997877	Bacteroides dorei CL03T12C01
1	1	S	1636152	Planctomyces sp. SH-PL62
1	1	S1	234267	Candidatus Solibacter usitatus Ellin6076
8	0	S	33903	Streptomyces avermitilis
4	0	S	379067	Streptomyces bingchenggensis
2	0	S	1950	Streptomyces peucetius
2	0	S1	55158	Streptomyces peucetius subsp. caesius
1	0	S	68280	Streptomyces violaceusniger
3	0	G	72763	Tessaracoccus
9	0	S	450734	Nocardioides dokdonensis
1	0	G	182639	Kribbella
1	0	S	182640	Kribbella flavida
15	0	G	1866885	Mycolicibacterium
3	0	S	1810	Mycolicibacterium vaccae
2	0	S	1772	Mycolicibacterium smegmatis
1	0	S	36814	Mycolicibacterium rhodesiae
3	0	G	697025	Hoyosella
3	0	S	639313	Hoyosella subflava
1	0	G	1073531	Mycolicibacter
4	0	S	1721	Corynebacterium callunae
3	0	G	2053	Gordonia
2	0	S	84595	Gordonia polyisoprenivorans
3	0	S	256701	Glutamicibacter arilaitensis
1	0	G	1269	Micrococcus
1	0	G	57493	Kocuria
2	0	G	43668	Brachybacterium
1	0	S	43669	Brachybacterium faecium
1	0	G	84756	Beutenbergia
1	0	S	84757	Beutenbergia cavernae
1	0	G	60919	Sanguibacter
1	0	S	60920	Sanguibacter keddieii
3	0	G	83677	Thermobifida
3	0	S	2021	Thermobifida fusca
2	0	S	1852	Saccharomonospora viridis
1	0	S	40990	Saccharomonospora glauca
4	0	G	1137960	Allokutzneria
1	0	G	165301	Lentzea
4	0	G	1678	Bifidobacterium
2	0	G	102106	Collinsella
1	0	S	1396	Bacillus cereus
6	0	G1	653685	Bacillus subtilis group
6	0	G2	653388	Bacillus mojavensis subgroup
1	0	S	1478	Bacillus simplex
1	0	S	665099	Bacillus oceanisediminis
1	0	S	300825	Bacillus lehensis
1	0	S	1404	Bacillus megaterium
1	0	G	182709	Oceanobacillus
1	0	G	400634	Lysinibacillus
1	0	G	459532	Terribacillus
1	0	G	1055323	Aeribacillus
3	0	S	1393	Brevibacillus brevis
1	0	G	76632	Thermobacillus
1	0	S	377615	Thermobacillus composti
6	0	G	45669	Salinicoccus
6	0	G	1677050	Novibacillus
3	0	G	2023	Thermoactinomyces
2	0	G	160795	Ureibacillus
1	0	G	648800	Solibacillus
10	0	G	1470540	Jeotgalibaca
2	0	G	46255	Weissella
1	0	S	39491	[Eubacterium] rectale
1	0	G	207244	Anaerostipes
1	0	G	216851	Faecalibacterium
1	0	G	2733	Symbiobacterium
1	0	S	2734	Symbiobacterium thermophilum
9	0	S	45497	[Clostridium] ultunense
1	0	G	150022	Finegoldia
1	0	S	1260	Finegoldia magna
8	0	G	191303	Turicibacter
2	0	G	365348	Pelosinus
1	0	S	365349	Pelosinus fermentans
136	0	G	449972	Chelativorans
1	0	G1	663276	Sinorhizobium fredii group
1	0	S	380	Sinorhizobium fredii
9	0	G	106591	Ensifer
2	0	G1	1183400	Agrobacterium tumefaciens complex
3	0	G	46913	Devosia
2	0	G	29407	Rhodoplanes
5	0	G	528	Ochrobactrum
2	0	G	1734920	Pseudorhodoplanes
1	0	G	133	Methylocystis
6	0	G	165697	Sphingopyxis
4	0	G	165696	Novosphingobium
3	0	S	48935	Novosphingobium aromaticivorans
3	0	G	165695	Sphingobium
1	0	G	13687	Sphingomonas
20	0	G1	136846	Pseudomonas stutzeri group
20	0	G2	578833	Pseudomonas stutzeri subgroup
20	0	S	316	Pseudomonas stutzeri
8	0	G1	136841	Pseudomonas aeruginosa group
3	0	G	1849530	Oblitimonas
1	0	G1	909768	Acinetobacter calcoaceticus/baumannii complex
9	0	G	475	Moraxella
1	0	G	570	Klebsiella
1	0	S	573	Klebsiella pneumoniae
1	0	G	590	Salmonella
1	0	S	28901	Salmonella enterica
2	0	G	122277	Pectobacterium
2	0	S	554	Pectobacterium carotovorum
2	0	G1	995085	Stenotrophomonas maltophilia group
23	0	G	469322	Steroidobacter
1	0	G	59195	Rickettsiella
3	0	G	662	Vibrio
1	0	G	67575	Rheinheimera
1	0	G	745	Pasteurella
1	0	S	747	Pasteurella multocida
3	0	G1	111527	pseudomallei group
4	0	G	1822464	Paraburkholderia
2	0	G	305976	Pusillimonas
1	0	G	517	Bordetella
1	0	G	90243	Oligella
1	0	G	290425	Advenella
1	0	S	310575	Advenella kashmirensis
5	0	G	2490452	Serpentinomonas
1	0	G	12916	Acidovorax
3	0	G	33057	Thauera
1	0	G	551759	Aromatoleum
1	0	S	551760	Aromatoleum aromaticum
4	0	G	40	Stigmatella
4	0	S	41	Stigmatella aurantiaca
2	0	G	1055688	Sandaracinus
1	0	G	39643	Sorangium
12	0	G	2357	Desulfomonile
12	0	S	2358	Desulfomonile tiedjei
2	0	G	28231	Geobacter
1	0	G	28196	Arcobacter
1	0	S	1278212	Arcobacter suis
3	0	G	70774	Hydrogenophilus
4	0	S	256	Myroides odoratus
2	0	G	501783	Cloacibacterium
1	0	G	237	Flavobacterium
1	0	G	143222	Salegentibacter
1	0	S	357276	Bacteroides dorei
3	0	G	107	Spirosoma
2	0	G	1433993	Chryseolinea
3	0	G	28453	Sphingobacterium
1	0	G	118	Planctomyces
8	0	G	2004797	Luteitalea
1	0	G	332162	Candidatus Solibacter
1	0	S	332163	Candidatus Solibacter usitatus
2	0	G	848	Fusobacterium
Tot G=163 Tot S=272
*A rank code, indicating (U)nclassified, (D)omain, (K)ingdom, (P)hylum, (C)lass, (O)rder, (F)amily, (G)enus, or (S)pecies. All other ranks are simply filled with a dash.

## Sheet: T9_virus
Number of reads covered by the clade rooted at this taxon	Number of reads assigned directly to this taxon	Rank code*	NCBI taxonomy ID	Indented scientific name
1	0	G	680116	Spbetavirus
1	0	G1	1732062	unclassified Spbetalikevirus
1	1	S	1732063	Staphylococcus phage SPbeta-like
1	1	G	1982251	Pahexavirus
Tot G=3 Tot S=1
*A rank code, indicating (U)nclassified, (D)omain, (K)ingdom, (P)hylum, (C)lass, (O)rder, (F)amily, (G)enus, or (S)pecies. All other ranks are simply filled with a dash.

## Sheet: T9_protozoa
Number of reads covered by the clade rooted at this taxon	Number of reads assigned directly to this taxon	Rank code*	NCBI taxonomy ID	Indented scientific name
6338	0	G	5810	Toxoplasma
6338	0	S	5811	Toxoplasma gondii
6338	6338	S1	508771	Toxoplasma gondii ME49
52	0	G	5820	Plasmodium
36	0	G1	418103	Plasmodium (Plasmodium)
36	36	S	5855	Plasmodium vivax
12	12	S	208452	Plasmodium coatneyi
4	1	G1	418101	Plasmodium (Vinckeia)
3	0	S	5825	Plasmodium chabaudi
3	3	S1	31271	Plasmodium chabaudi chabaudi
25	0	G	5690	Trypanosoma
25	0	G1	39700	Trypanozoon
25	0	S	5691	Trypanosoma brucei
25	0	S1	31285	Trypanosoma brucei gambiense
25	25	S2	679716	Trypanosoma brucei gambiense DAL972
Tot G=6 Tot S=9
*A rank code, indicating (U)nclassified, (D)omain, (K)ingdom, (P)hylum, (C)lass, (O)rder, (F)amily, (G)enus, or (S)pecies. All other ranks are simply filled with a dash.

## Sheet: F9_bacteria
Number of reads covered by the clade rooted at this taxon	Number of reads assigned directly to this taxon	Rank code*	NCBI taxonomy ID	Indented scientific name
2926	2926	S	1889813	Anaerolineaceae bacterium oral taxon 439
576	184	G	1654	Actinomyces
386	386	S	712122	Actinomyces sp. oral taxon 414
3	0	S	706438	Actinomyces sp. oral taxon 171
3	3	S1	706439	Actinomyces sp. oral taxon 171 str. F0337
2	2	S	52771	Actinomyces howellii
1	0	S	649739	Actinomyces sp. oral taxon 848
1	1	S1	649743	Actinomyces sp. oral taxon 848 str. F0332
27	0	G	2529408	Schaalia
25	0	S	181487	Schaalia cardiffensis
25	25	S1	888050	Schaalia cardiffensis F0333
2	2	S	52773	Schaalia meyeri
304	0	G	1912217	Pseudopropionibacterium
304	304	S	1750	Pseudopropionibacterium propionicum
50	1	G	1743	Propionibacterium
49	49	S	556499	Propionibacterium acidifaciens
44	0	G	1912216	Cutibacterium
44	44	S	1747	Cutibacterium acnes
2	0	G	182639	Kribbella
2	0	S	182640	Kribbella flavida
2	2	S1	479435	Kribbella flavida DSM 17836
67	67	G	1883	Streptomyces
71	54	G	2000	Streptosporangium
14	0	S	2001	Streptosporangium roseum
14	14	S1	479432	Streptosporangium roseum DSM 43021
3	3	S	2202249	Streptosporangium sp. 'caverna'
7	0	G	1269	Micrococcus
7	7	S	1270	Micrococcus luteus
6	5	G	32207	Rothia
1	0	S	2047	Rothia dentocariosa
1	1	S1	762948	Rothia dentocariosa ATCC 17931
5	5	G	1873	Micromonospora
1	1	G	281472	Jiangella
337	4	G	133925	Olsenella
333	333	S	712411	Olsenella sp. oral taxon 807
338	0	S	76124	[Eubacterium] minutum
338	338	S1	888721	Eubacterium minutum ATCC 700079
2	1	G	86331	Mogibacterium
1	1	S	86332	Mogibacterium pumilum
1	0	S	143393	[Eubacterium] sulci
1	1	S1	888727	Eubacterium sulci ATCC 35585
12	12	S	712991	Lachnospiraceae bacterium oral taxon 500
10	0	G	44259	Filifactor
10	0	S	143361	Filifactor alocis
10	10	S1	546269	Filifactor alocis ATCC 35896
3	0	G	1485	Clostridium
2	2	S	1491	Clostridium botulinum
1	1	S	1513	Clostridium tetani
2	0	G	51514	Dehalobacterium
2	2	S	51515	Dehalobacterium formicoaceticum
292	205	G	1301	Streptococcus
28	27	S	1309	Streptococcus mutans
1	1	S1	511691	Streptococcus mutans NN2025
27	27	S	1302	Streptococcus gordonii
10	10	S	1305	Streptococcus sanguinis
5	5	S	1303	Streptococcus oralis
4	4	S	1433513	Streptococcus sp. ChDC B345
4	4	S	1839799	Streptococcus sp. FDAARGOS_192
3	0	G1	119603	Streptococcus dysgalactiae group
3	2	S	1336	Streptococcus equi
1	1	S1	40041	Streptococcus equi subsp. zooepidemicus
2	0	G1	671232	Streptococcus anginosus group
2	0	S	1328	Streptococcus anginosus
2	0	S1	1272910	Streptococcus anginosus subsp. whileyi
2	2	S2	1353243	Streptococcus anginosus subsp. whileyi MAS624
1	1	S	33040	Streptococcus milleri
1	1	S	28037	Streptococcus mitis
1	1	S	1343	Streptococcus vestibularis
1	1	S	1313	Streptococcus pneumoniae
5	0	G	1279	Staphylococcus
4	4	S	1282	Staphylococcus epidermidis
1	1	S	1280	Staphylococcus aureus
2	1	G	1386	Bacillus
1	0	S	1398	Bacillus coagulans
1	1	S1	941639	Bacillus coagulans 2-6
49	8	G	29465	Veillonella
41	40	S	29466	Veillonella parvula
1	1	S1	1316254	Veillonella parvula HSIVP1
11	0	G	543311	Parvimonas
11	11	S	33033	Parvimonas micra
1	0	G	165812	Sporanaerobacter
1	1	S	2507161	Sporanaerobacter sp. NJN-17
152	144	G	286	Pseudomonas
6	6	S	1415630	Pseudomonas sp. TKP
2	2	S	198620	Pseudomonas koreensis
6	5	G	469	Acinetobacter
1	1	S	40214	Acinetobacter johnsonii
1	0	G	475	Moraxella
1	1	S	34062	Moraxella osloensis
35	15	G	724	Haemophilus
18	18	S	729	Haemophilus parainfluenzae
2	2	S	712310	Haemophilus sp. oral taxon 036
1	0	G	416916	Aggregatibacter
1	1	S	732	Aggregatibacter aphrophilus
3	0	G	547	Enterobacter
3	0	G1	354276	Enterobacter cloacae complex
3	3	S	550	Enterobacter cloacae
2	0	G	583	Proteus
2	2	S	584	Proteus mirabilis
1	0	G	68	Lysobacter
1	1	S	262324	Lysobacter gummosus
1	0	G	338	Xanthomonas
1	1	S	339	Xanthomonas campestris
46	44	G	407	Methylobacterium
2	0	S	31998	Methylobacterium radiotolerans
2	2	S1	426355	Methylobacterium radiotolerans JCM 2831
31	14	G	374	Bradyrhizobium
4	4	S	2057741	Bradyrhizobium sp. SK17
4	4	S	1437360	Bradyrhizobium erythrophlei
4	4	S	1325090	Bradyrhizobium guangdongense
2	2	S	1355477	Bradyrhizobium diazoefficiens
2	2	S	1274631	Bradyrhizobium icense
1	1	S	722472	Bradyrhizobium lablabi
4	4	G	68287	Mesorhizobium
47	39	G	13687	Sphingomonas
8	3	S	152682	Sphingomonas melonis
5	5	S1	621456	Sphingomonas melonis TY
115	1	G	898	Desulfomicrobium
114	0	S	132132	Desulfomicrobium orale
114	114	S1	888061	Desulfomicrobium orale DSM 12838
50	0	G	893	Desulfobulbus
50	50	S	1986146	Desulfobulbus oralis
6	0	G	39643	Sorangium
6	6	S	56	Sorangium cellulosum
4	0	G	52972	Polaromonas
4	4	S	296591	Polaromonas sp. JS666
2	2	G	80865	Delftia
1	0	G	47420	Hydrogenophaga
1	1	S	2184519	Hydrogenophaga sp. NH-16
1	1	G	963	Herbaspirillum
1	0	G	47670	Lautropia
1	1	S	47671	Lautropia mirabilis
1	0	G	48736	Ralstonia
1	1	S	305	Ralstonia solanacearum
2	2	G	482	Neisseria
5	2	G	838	Prevotella
2	2	S	28132	Prevotella melaninogenica
1	1	S	28129	Prevotella denticola
3	0	G	836	Porphyromonas
3	3	S	837	Porphyromonas gingivalis
2	2	G	816	Bacteroides
1	0	G	195950	Tannerella
1	1	S	28112	Tannerella forsythia
5	0	G	237	Flavobacterium
5	5	S	96345	Flavobacterium psychrophilum
1	0	G	1016	Capnocytophaga
1	1	S	1017	Capnocytophaga gingivalis
1	0	G	79328	Chitinophaga
1	1	S	2033437	Chitinophaga sp. MD30
8	2	G	848	Fusobacterium
4	0	S	859	Fusobacterium necrophorum
4	4	S1	143387	Fusobacterium necrophorum subsp. funduliforme
2	2	S	860	Fusobacterium periodonticum
3	1	G	32067	Leptotrichia
1	1	S	712357	Leptotrichia sp. oral taxon 212
1	1	S	712368	Leptotrichia sp. oral taxon 498
9	3	G	157	Treponema
6	6	S	158	Treponema denticola
4	4	S	713059	TM7 phylum sp. oral taxon 488
5	0	G	2004797	Luteitalea
5	5	S	1855912	Luteitalea pratensis
Tot G=60 Tot S=101
*A rank code, indicating (U)nclassified, (D)omain, (K)ingdom, (P)hylum, (C)lass, (O)rder, (F)amily, (G)enus, or (S)pecies. All other ranks are simply filled with a dash.

## Sheet: F9_femur_bacteria
Number of reads covered by the clade rooted at this taxon	Number of reads assigned directly to this taxon	Rank code*	NCBI taxonomy ID	Indented scientific name
1007	633	G	1279	Staphylococcus
147	147	S	214473	Staphylococcus nepalensis
118	117	S	1296	Staphylococcus sciuri
1	1	S1	147467	Staphylococcus sciuri subsp. sciuri
31	31	S	1288	Staphylococcus xylosus
18	18	S	29382	Staphylococcus cohnii
15	15	S	61015	Staphylococcus succinus
12	12	S	246432	Staphylococcus equorum
9	9	S	29384	Staphylococcus kloosii
7	7	S	29385	Staphylococcus saprophyticus
6	6	S	1280	Staphylococcus aureus
3	3	S	1290	Staphylococcus hominis
3	3	S	1283	Staphylococcus haemolyticus
3	3	S	1282	Staphylococcus epidermidis
1	1	S	45972	Staphylococcus pasteuri
1	1	S	29388	Staphylococcus capitis
334	0	G	45669	Salinicoccus
334	334	S	407035	Salinicoccus halodurans
17	0	G	227979	Jeotgalicoccus
17	17	S	1461582	Jeotgalicoccus saudimassiliensis
2	0	G	69965	Macrococcus
2	2	S	1898474	Macrococcus sp. IME1552
864	560	G	1386	Bacillus
104	78	G1	86661	Bacillus cereus group
11	3	S	1396	Bacillus cereus
4	4	S1	526973	Bacillus cereus m1293
3	3	S1	1454382	Bacillus cereus D17
1	1	S1	526983	Bacillus cereus Rock3-28
8	6	S	1428	Bacillus thuringiensis
2	2	S1	1442	Bacillus thuringiensis serovar tolworthi
6	6	S	64104	Bacillus pseudomycoides
1	1	S	1405	Bacillus mycoides
101	101	S	79880	Bacillus clausii
16	16	S	1408	Bacillus pumilus
14	14	S	86664	Bacillus flexus
14	14	S	35841	Bacillus thermoamylovorans
10	5	G1	653685	Bacillus subtilis group
3	3	S	1402	Bacillus licheniformis
2	0	G2	653388	Bacillus mojavensis subgroup
2	2	S	260554	Bacillus halotolerans
8	8	S	450367	[Brevibacterium] frigoritolerans
8	8	S	1565991	Bacillus sp. X1(2014)
7	0	S	665099	Bacillus oceanisediminis
7	7	S1	1196031	Bacillus oceanisediminis 2691
5	2	S	1404	Bacillus megaterium
2	2	S1	1138452	Bacillus megaterium NCT-2
1	1	S1	1348623	Bacillus megaterium NBRC 15308 = ATCC 14581
3	3	S	1215031	Bacillus thermocopriae
3	3	S	561879	Bacillus safensis
2	2	S	1478	Bacillus simplex
2	0	S	1471	Bacillus methanolicus
2	2	S1	796606	Bacillus methanolicus MGA3
2	2	S	2011012	Bacillus sp. FJAT-45348
2	2	S	1397	Bacillus circulans
1	1	S	1398	Bacillus coagulans
1	1	S	1581038	Bacillus sp. FJAT-22090
1	1	S	1479	Bacillus smithii
33	26	G	129337	Geobacillus
7	7	S	471223	Geobacillus sp. WCH70
33	10	G	400634	Lysinibacillus
13	13	S	2072025	Lysinibacillus sp. YS11
6	6	S	2169540	Lysinibacillus sp. 2017
4	4	S	1421	Lysinibacillus sphaericus
8	0	G	29331	Amphibacillus
8	0	S	1449	Amphibacillus xylanus
8	8	S1	698758	Amphibacillus xylanus NBRC 15112
6	0	G	1906945	Parageobacillus
6	6	S	1295642	Parageobacillus genomosp. 1
5	0	G	84406	Virgibacillus
3	3	S	1482	Virgibacillus halodenitrificans
2	2	S	2017483	Virgibacillus phasianinus
5	0	G	182709	Oceanobacillus
3	3	S	182710	Oceanobacillus iheyensis
2	2	S	2052660	Oceanobacillus sp. 160
4	0	G	459532	Terribacillus
4	4	S	386490	Terribacillus goriensis
4	0	G	1055323	Aeribacillus
4	4	S	33936	Aeribacillus pallidus
3	0	G	1329200	Fictibacillus
3	3	S	255247	Fictibacillus arsenicus
224	159	G	44249	Paenibacillus
26	26	S	481743	Paenibacillus sp. Y412MC10
7	7	S	162209	Paenibacillus naphthalenovorans
6	6	S	528191	Paenibacillus xylanexedens
4	4	S	1536774	Paenibacillus sp. FSL H7-0357
4	4	S	1763538	Paenibacillus crassostreae
4	4	S	189426	Paenibacillus odorifer
3	3	S	867076	Paenibacillus sp. IHB B 3084
3	3	S	1695218	Paenibacillus sp. 32O-W
3	3	S	61624	Paenibacillus mucilaginosus
2	2	S	1406	Paenibacillus polymyxa
2	2	S	1536770	Paenibacillus sp. FSL R5-0345
1	1	S	1566358	Paenibacillus sp. IHBB 10380
123	0	G	76632	Thermobacillus
123	0	S	377615	Thermobacillus composti
123	123	S1	717605	Thermobacillus composti KWC4
28	0	G	55080	Brevibacillus
28	28	S	1465	Brevibacillus laterosporus
2	0	G	55079	Aneurinibacillus
2	2	S	1450761	Aneurinibacillus sp. XH2
202	0	G	160795	Ureibacillus
202	202	S	51173	Ureibacillus thermosphaericus
29	0	G	648800	Solibacillus
29	29	S	76853	Solibacillus silvestris
15	13	G	1372	Planococcus
2	2	S	200991	Planococcus rifietoensis
4	0	G	1569	Sporosarcina
4	4	S	1930546	Sporosarcina sp. P37
4	0	G	1649	Kurthia
4	4	S	1650	Kurthia zopfii
156	0	G	1677050	Novibacillus
156	156	S	1471761	Novibacillus thermophilus
71	71	S	2490858	Thermoactinomycetaceae bacterium SCSIO 07575
15	0	G	2023	Thermoactinomyces
15	15	S	2026	Thermoactinomyces vulgaris
3	0	G	1378	Gemella
3	3	S	29391	Gemella morbillorum
2	0	G	2755	Brochothrix
2	2	S	2756	Brochothrix thermosphacta
235	229	G	1301	Streptococcus
5	5	S	1305	Streptococcus sanguinis
1	1	S	1316409	Streptococcus sp. HSISB1
1	0	G	1357	Lactococcus
1	1	S	1358	Lactococcus lactis
106	21	G	1350	Enterococcus
41	41	S	1352	Enterococcus faecium
36	36	S	1351	Enterococcus faecalis
7	7	S	1354	Enterococcus hirae
1	1	S	44008	Enterococcus cecorum
87	27	G	1578	Lactobacillus
17	17	S	1624	Lactobacillus salivarius
11	11	S	1622	Lactobacillus murinus
8	8	S	1598	Lactobacillus reuteri
7	7	S	47770	Lactobacillus crispatus
5	5	S	1579	Lactobacillus acidophilus
4	0	S	1623	Lactobacillus ruminis
4	4	S1	1069534	Lactobacillus ruminis ATCC 27782
3	3	S	1610	Lactobacillus coryniformis
2	0	S	1581	Lactobacillus buchneri
2	2	S1	511437	Lactobacillus buchneri NRRL B-30929
2	2	G1	655183	Lactobacillus casei group
1	1	S	1587	Lactobacillus helveticus
5	0	G	1253	Pediococcus
5	5	S	1255	Pediococcus pentosaceus
33	16	G	1375	Aerococcus
16	16	S	51665	Aerococcus urinaeequi
1	1	S	1377	Aerococcus viridans
7	0	G	46255	Weissella
7	7	S	137591	Weissella cibaria
4	0	G	1470540	Jeotgalibaca
3	3	S	1903686	Jeotgalibaca sp. PTS2502
1	1	S	708126	Jeotgalibaca dankookensis
3	0	G	2747	Carnobacterium
3	0	S	147709	Carnobacterium inhibens
3	3	S1	1266845	Carnobacterium inhibens subsp. gilichinskyi
816	532	G	1485	Clostridium
220	220	S	1502	Clostridium perfringens
20	20	S	1561	Clostridium baratii
19	19	S	1492	Clostridium butyricum
14	13	S	1491	Clostridium botulinum
1	1	S1	1415774	Clostridium botulinum 202F
5	5	S	1494	Clostridium cochlearium
4	4	S	182773	Clostridium isatidis
2	2	S	29341	Clostridium argentinense
34	0	S	39491	[Eubacterium] rectale
34	34	S1	515619	[Eubacterium] rectale ATCC 33656
1	1	S	2109691	Lachnospiraceae bacterium GAM79
22	0	G	1663717	Herbinix
22	22	S	1679721	Herbinix luporum
9	0	G	207244	Anaerostipes
9	9	S	649756	Anaerostipes hadrus
6	0	G	841	Roseburia
6	0	S	166486	Roseburia intestinalis
6	6	S1	536231	Roseburia intestinalis L1-82
4	0	G	1506553	Lachnoclostridium
3	3	S	1871021	Lachnoclostridium phocaeense
1	0	S	84030	[Clostridium] saccharolyticum
1	1	S1	610130	[Clostridium] saccharolyticum WM1
3	1	G	572511	Blautia
2	2	S	1912897	Blautia sp. N6H1-15
1	0	G	2569097	Anaerobutyricum
1	1	S	39488	Anaerobutyricum hallii
75	0	G	2733	Symbiobacterium
75	0	S	2734	Symbiobacterium thermophilum
75	75	S1	292459	Symbiobacterium thermophilum IAM 14863
27	1	G	2304692	Hungateiclostridium
26	26	S	1677857	Hungateiclostridium saccincola
4	0	G	2304691	Thermoclostridium
4	0	S	1510	Thermoclostridium stercorarium
4	0	S1	160385	Thermoclostridium stercorarium subsp. leptospartum
4	4	S2	1346611	Thermoclostridium stercorarium subsp. leptospartum DSM 9219
1	0	G	2304693	Pseudoclostridium
1	1	S	84032	Pseudoclostridium thermosuccinogenes
8	8	S	29343	[Clostridium] cellulosi
5	0	G	1263	Ruminococcus
4	4	S	2564099	Ruminococcus sp. JE7A12
1	0	S	1161942	Ruminococcus champanellensis
1	1	S1	213810	Ruminococcus champanellensis 18P13 = JCM 17042
4	0	G	216851	Faecalibacterium
4	4	S	853	Faecalibacterium prausnitzii
3	0	G	459786	Oscillibacter
3	0	S	351091	Oscillibacter valericigenes
3	3	S1	693746	Oscillibacter valericigenes Sjm18-20
1	0	G	1849828	Paeniclostridium
1	1	S	1505	Paeniclostridium sordellii
1	0	G	1730	Eubacterium
1	0	S	39485	[Eubacterium] eligens
1	1	S1	515620	[Eubacterium] eligens ATCC 27750
297	0	G	191303	Turicibacter
297	297	S	1712675	Turicibacter sp. H121
1	0	G	165812	Sporanaerobacter
1	1	S	2507161	Sporanaerobacter sp. NJN-17
572	71	G	1742989	Glutamicibacter
455	0	S	256701	Glutamicibacter arilaitensis
455	455	S1	861360	Glutamicibacter arilaitensis Re117
44	44	S	37929	Glutamicibacter nicotianae
2	2	S	1933880	Glutamicibacter halophytocola
51	0	G	1269	Micrococcus
51	51	S	1270	Micrococcus luteus
35	13	G	57493	Kocuria
19	19	S	1275	Kocuria rosea
2	2	S	1049583	Kocuria indica
1	1	S	71999	Kocuria palustris
18	8	G	1663	Arthrobacter
4	4	S	1806905	Arthrobacter sp. ZXY-2
2	2	S	1652545	Arthrobacter sp. YC-RL1
2	2	S	2020486	Arthrobacter sp. YN
1	1	S	656366	Arthrobacter alpinus
1	1	S	2079227	Arthrobacter sp. PGP41
5	0	G	1742993	Pseudarthrobacter
3	3	S	121292	Pseudarthrobacter sulfonivorans
2	0	S	361575	Pseudarthrobacter phenanthrenivorans
2	2	S1	930171	Pseudarthrobacter phenanthrenivorans Sphe3
3	3	G	32207	Rothia
240	81	G	1696	Brevibacterium
68	68	S	629680	Brevibacterium sandarakinum
62	62	S	273384	Brevibacterium aurantiacum
28	28	S	1703	Brevibacterium linens
1	1	S	2575923	Brevibacterium sp. CS2
184	61	G	43668	Brachybacterium
53	0	S	43669	Brachybacterium faecium
53	53	S1	446465	Brachybacterium faecium DSM 4810
47	47	S	1903186	Brachybacterium sp. P6-10-X1
18	18	S	1331682	Brachybacterium ginsengisoli
5	5	S	2017485	Brachybacterium sp. VR2415
64	0	G	43673	Jonesia
64	64	S	43674	Jonesia denitrificans
16	2	G	33882	Microbacterium
13	13	S	104336	Microbacterium foliorum
1	1	S	84292	Microbacterium chocolatum
3	3	G	190323	Plantibacter
2	0	G	55968	Leucobacter
2	2	S	1935379	Leucobacter sp. DSM 101948
2	0	G	1573	Clavibacter
2	2	S	28447	Clavibacter michiganensis
2	0	G	337004	Microcella
2	2	S	279828	Microcella alkaliphila
1	1	G	1705353	Aurantimicrobium
17	0	G	57499	Kytococcus
17	0	S	1276	Kytococcus sedentarius
17	17	S1	478801	Kytococcus sedentarius DSM 20547
4	0	G	53457	Janibacter
4	4	S	53458	Janibacter limosus
379	52	G	1716	Corynebacterium
265	265	S	1705	Corynebacterium stationis
23	0	S	160386	Corynebacterium casei
23	23	S1	1285583	Corynebacterium casei LMG S-19264
23	23	S	401472	Corynebacterium ureicelerivorans
4	4	S	43770	Corynebacterium striatum
4	0	S	1223514	Corynebacterium humireducens
4	4	S1	1223515	Corynebacterium humireducens NBRC 106098 = DSM 45392
3	3	S	1725	Corynebacterium xerosis
2	0	S	1727	Corynebacterium variabile
2	2	S1	858619	Corynebacterium variabile DSM 44702
1	0	S	1721	Corynebacterium callunae
1	1	S1	1121353	Corynebacterium callunae DSM 20147
1	0	S	38288	Corynebacterium genitalium
1	1	S1	585529	Corynebacterium genitalium ATCC 33030
1	1	S	1718	Corynebacterium glutamicum
38	3	G	1866885	Mycolicibacterium
14	14	S	1797	Mycolicibacterium thermoresistibile
7	7	S	1792	Mycolicibacterium chitae
7	0	S	1810	Mycolicibacterium vaccae
7	7	S1	1354275	Mycolicibacterium vaccae 95051
4	0	S	46351	Mycolicibacterium hassiacum
4	4	S1	1122247	Mycolicibacterium hassiacum DSM 44199
3	3	S	1804	Mycolicibacterium gilvum
11	0	G	1073531	Mycolicibacter
11	11	S	875328	Mycolicibacter sinensis
5	0	G	1763	Mycobacterium
4	0	G1	120793	Mycobacterium avium complex (MAC)
4	0	S	1764	Mycobacterium avium
4	4	S1	243243	Mycobacterium avium 104
1	1	S	482462	Mycobacterium dioxanotrophicus
50	37	G	1827	Rhodococcus
6	6	S	43767	Rhodococcus hoagii
5	5	S	1829	Rhodococcus rhodochrous
2	2	S	1990687	Rhodococcus sp. S2-17
1	0	G	1817	Nocardia
1	1	S	37329	Nocardia farcinica
3	1	G	2053	Gordonia
2	2	S	1737359	Gordonia sp. 1D
341	12	G	1912216	Cutibacterium
328	328	S	1747	Cutibacterium acnes
1	1	S	33011	Cutibacterium granulosum
1	0	G	72763	Tessaracoccus
1	1	S	1909732	Tessaracoccus sp. T2.5-30
27	15	G	1839	Nocardioides
5	5	S	2500546	Nocardioides sp. HY056
4	4	S	110319	Nocardioides sp. CF8
2	0	S	450734	Nocardioides dokdonensis
2	2	S1	1300347	Nocardioides dokdonensis FR1436
1	1	S	2518370	Nocardioides sp. MMS17-SY117
69	63	G	1883	Streptomyces
6	6	S	2203204	Streptomyces sp. WAC 01438
37	0	G	2019	Thermomonospora
37	0	S	2020	Thermomonospora curvata
37	37	S1	471852	Thermomonospora curvata DSM 43183
20	0	G	83677	Thermobifida
20	0	S	2021	Thermobifida fusca
20	20	S1	269800	Thermobifida fusca YX
1	0	G	2013	Nocardiopsis
1	0	S	53437	Nocardiopsis alba
1	1	S1	1205910	Nocardiopsis alba ATCC BAA-2165
8	0	G	2000	Streptosporangium
7	7	S	2202249	Streptosporangium sp. 'caverna'
1	0	S	2001	Streptosporangium roseum
1	1	S1	479432	Streptosporangium roseum DSM 43021
45	0	G	147067	Thermobispora
45	0	S	2006	Thermobispora bispora
45	45	S1	469371	Thermobispora bispora DSM 43833
35	5	G	1851	Saccharomonospora
16	0	S	40988	Saccharomonospora azurea
16	16	S1	882081	Saccharomonospora azurea NA-128
14	0	S	1852	Saccharomonospora viridis
14	14	S1	471857	Saccharomonospora viridis DSM 43017
3	0	G	142577	Prauserella
3	3	S	530584	Prauserella marina
15	15	G	1873	Micromonospora
12	4	G	1678	Bifidobacterium
4	4	S	1683	Bifidobacterium angulatum
4	4	S	1685	Bifidobacterium breve
7	0	G	1522056	Flaviflexus
7	7	S	2496867	Flaviflexus sp. H23T48
2	0	G	38501	Blastococcus
2	0	S	138336	Blastococcus saxobsidens
2	2	S1	1146883	Blastococcus saxobsidens DD2
2	0	G	281472	Jiangella
2	2	S	419479	Jiangella alkaliphila
1	0	G	414878	Catenulispora
1	0	S	304895	Catenulispora acidiphila
1	1	S1	479433	Catenulispora acidiphila DSM 44928
7	0	G	102106	Collinsella
7	7	S	74426	Collinsella aerofaciens
3	0	G	133925	Olsenella
3	3	S	604330	Olsenella umbonata
576	465	G	270	Thermus
79	75	S	274	Thermus thermophilus
4	4	S1	762633	Thermus thermophilus SG0.5JP17-16
19	0	S	37636	Thermus scotoductus
19	19	S1	743525	Thermus scotoductus SA-01
10	10	S	456163	Thermus parvatiensis
2	0	S	271	Thermus aquaticus
2	2	S1	498848	Thermus aquaticus Y51MC23
1	1	S	56956	Thermus brockianus
485	0	G	2056	Sphaerobacter
485	0	S	2057	Sphaerobacter thermophilus
485	485	S1	479434	Sphaerobacter thermophilus DSM 20745
1	0	G	1155738	Moorea
1	0	S	1155739	Moorea producens
1	1	S1	1454205	Moorea producens JHB
6	0	G	146785	Thermosynechococcus
6	6	S	1394889	Thermosynechococcus sp. NK55a
1973	1805	G	286	Pseudomonas
55	2	G1	136846	Pseudomonas stutzeri group
52	0	G2	578833	Pseudomonas stutzeri subgroup
52	13	S	316	Pseudomonas stutzeri
39	39	S1	1123519	Pseudomonas stutzeri DSM 10701
1	1	S	271420	Pseudomonas xanthomarina
21	4	G1	136845	Pseudomonas putida group
14	13	S	303	Pseudomonas putida
1	1	S1	231023	Pseudomonas putida ND6
3	3	S	70775	Pseudomonas plecoglossicida
20	4	G1	136849	Pseudomonas syringae group
13	13	S	33069	Pseudomonas viridiflava
2	0	G2	251695	Pseudomonas syringae group genomosp. 1
2	0	S	317	Pseudomonas syringae
2	0	S1	321	Pseudomonas syringae pv. syringae
2	2	S2	1324931	Pseudomonas syringae pv. syringae B301D
1	0	S	36746	Pseudomonas cichorii
1	1	S1	1441629	Pseudomonas cichorii JBC1
16	16	S	1499686	Pseudomonas saudiphocaensis
9	1	G1	136841	Pseudomonas aeruginosa group
7	7	S	287	Pseudomonas aeruginosa
1	1	S	43263	Pseudomonas alcaligenes
9	9	S	1259844	Pseudomonas sp. FGI182
7	7	S	2505979	Pseudomonas sp. 11K1
7	7	S	1415630	Pseudomonas sp. TKP
4	4	S	797277	Pseudomonas litoralis
4	4	S	86265	Pseudomonas thivervalensis
3	3	S	2054914	Pseudomonas sp. 02C 26
3	3	S	2219057	Pseudomonas sp. LG1E9
2	2	S	1736226	Pseudomonas sp. Leaf58
2	2	S	1306993	Pseudomonas soli
2	0	G1	136842	Pseudomonas chlororaphis group
2	0	S	587753	Pseudomonas chlororaphis
2	2	S1	587851	Pseudomonas chlororaphis subsp. aureofaciens
2	2	S	1283291	Pseudomonas sp. URMO17WK12:I11
1	1	S	2320270	Pseudomonas sp. DG56-2
1	1	G1	136843	Pseudomonas fluorescens group
387	267	G	469	Acinetobacter
84	27	G1	909768	Acinetobacter calcoaceticus/baumannii complex
55	55	S	471	Acinetobacter calcoaceticus
2	2	S	48296	Acinetobacter pittii
10	10	S	40214	Acinetobacter johnsonii
5	5	S	28090	Acinetobacter lwoffii
5	5	S	40215	Acinetobacter junii
4	4	S	1636603	Acinetobacter sp. ACNIH1
4	4	S	756892	Acinetobacter indicus
3	3	S	106649	Acinetobacter guillouiae
3	3	S	1608473	Acinetobacter sp. NCu2D-2
1	1	S	40216	Acinetobacter radioresistens
1	1	S	108981	Acinetobacter schindleri
11	2	G	497	Psychrobacter
9	9	S	349106	Psychrobacter sp. PRwf-1
3	0	G	475	Moraxella
3	3	S	34062	Moraxella osloensis
167	85	G	53335	Pantoea
82	0	G1	1654067	Pantoea agglomerans group
82	82	S	549	Pantoea agglomerans
21	4	G	551	Erwinia
16	16	S	55211	Erwinia persicina
1	0	S	182337	Erwinia billingiae
1	1	S1	634500	Erwinia billingiae Eb661
30	7	G	547	Enterobacter
23	10	G1	354276	Enterobacter cloacae complex
9	9	S	550	Enterobacter cloacae
4	4	S	299767	Enterobacter ludwigii
4	2	G	570	Klebsiella
2	0	S	573	Klebsiella pneumoniae
2	2	S1	72407	Klebsiella pneumoniae subsp. pneumoniae
2	0	G	579	Kluyvera
2	2	S	61648	Kluyvera intermedia
2	2	G	544	Citrobacter
1	0	G	561	Escherichia
1	1	S	564	Escherichia fergusonii
51	49	G	613	Serratia
2	2	S	82996	Serratia plymuthica
2	1	G	629	Yersinia
1	1	S	630	Yersinia enterocolitica
4	0	G	122277	Pectobacterium
4	4	S	554	Pectobacterium carotovorum
1	0	G	583	Proteus
1	1	S	584	Proteus mirabilis
59	18	G	338	Xanthomonas
36	36	S	339	Xanthomonas campestris
5	0	S	456327	Xanthomonas euvesicatoria
5	0	S1	359387	Xanthomonas euvesicatoria pv. alfalfae
5	5	S2	1365647	Xanthomonas euvesicatoria pv. alfalfae CFBP 3836
17	13	G	40323	Stenotrophomonas
3	3	S	128780	Stenotrophomonas acidaminiphila
1	0	G1	995085	Stenotrophomonas maltophilia group
1	1	S	40324	Stenotrophomonas maltophilia
10	0	G	83618	Pseudoxanthomonas
10	0	S	314722	Pseudoxanthomonas suwonensis
10	10	S1	743721	Pseudoxanthomonas suwonensis 11-1
8	0	G	68	Lysobacter
8	8	S	435897	Lysobacter capsici
38	27	G	642	Aeromonas
8	8	S	654	Aeromonas veronii
2	2	S	645	Aeromonas salmonicida
1	1	S	948519	Aeromonas rivipollensis
14	8	G	416	Methylomonas
6	6	S	107637	Methylomonas sp. LW13
7	0	G	73778	Methylocaldum
7	7	S	1432792	Methylocaldum marinum
9	5	G	2745	Halomonas
2	2	S	1971364	Halomonas sp. GT
2	0	S	2746	Halomonas elongata
2	2	S1	768066	Halomonas elongata DSM 2581
5	5	G	59753	Alcanivorax
9	0	G	2742	Marinobacter
9	7	S	2743	Marinobacter hydrocarbonoclasticus
2	2	S1	351348	Marinobacter hydrocarbonoclasticus VT8
4	3	G	22	Shewanella
1	1	S	62322	Shewanella baltica
5	0	G	2034504	Sulfurivermis
5	5	S	1972068	Sulfurivermis fontis
4	0	G	53392	Thiodictyon
4	4	S	1166950	Candidatus Thiodictyon syntrophicum
6	0	G	745	Pasteurella
6	0	S	747	Pasteurella multocida
6	6	S1	44283	Pasteurella multocida subsp. multocida
3	0	G	445	Legionella
2	2	S	452	Legionella spiritensis
1	0	S	96230	Legionella fallonii
1	1	S1	1212491	Legionella fallonii LLAP-10
1	0	G	1193503	Gilliamella
1	1	S	1196095	Gilliamella apicola
269	45	G	52972	Polaromonas
224	224	S	296591	Polaromonas sp. JS666
100	27	G	34072	Variovorax
56	35	S	34073	Variovorax paradoxus
14	14	S1	543728	Variovorax paradoxus S110
5	5	S1	595537	Variovorax paradoxus EPS
2	2	S1	1246301	Variovorax paradoxus B4
16	16	S	436515	Variovorax boronicumulans
1	1	S	2126319	Variovorax sp. PMC12
86	86	G	80865	Delftia
32	15	G	12916	Acidovorax
6	0	S	721785	Acidovorax ebreus
6	6	S1	535289	Acidovorax ebreus TPSY
5	5	S	358220	Acidovorax sp. KKS102
3	3	S	1842533	Acidovorax sp. RAC01
2	2	S	232721	Acidovorax sp. JS42
1	1	S	553814	Acidovorax carolinensis
11	3	G	47420	Hydrogenophaga
6	6	S	2184519	Hydrogenophaga sp. NH-16
1	1	S	47421	Hydrogenophaga pseudoflava
1	1	S	795665	Hydrogenophaga sp. PBC
7	0	G	2490452	Serpentinomonas
7	7	S	1458426	Serpentinomonas mccroryi
6	0	G	665874	Limnohabitans
6	6	S	1678128	Limnohabitans sp. 63ED37-2
3	0	G	238749	Diaphorobacter
3	3	S	1546149	Diaphorobacter polyhydroxybutyrativorans
1	0	G	1649468	Melaminivora
1	1	S	2116657	Melaminivora sp. SC2-7
108	16	G	1822464	Paraburkholderia
81	81	S	134537	Paraburkholderia fungorum
11	11	S	2026199	Paraburkholderia aromaticivorans
103	91	G	32008	Burkholderia
11	0	G1	87882	Burkholderia cepacia complex
4	4	S	60552	Burkholderia vietnamiensis
4	4	S	1503055	Burkholderia territorii
2	2	S	95486	Burkholderia cenocepacia
1	1	S	87883	Burkholderia multivorans
1	1	S	1705310	Burkholderia sp. IDO3
84	15	G	48736	Ralstonia
57	57	S	190721	Ralstonia insidiosa
10	10	S	305	Ralstonia solanacearum
2	0	S	329	Ralstonia pickettii
2	2	S1	428406	Ralstonia pickettii 12D
5	0	G	106589	Cupriavidus
5	4	S	119219	Cupriavidus metallidurans
1	1	S1	266264	Cupriavidus metallidurans CH34
63	9	G	290425	Advenella
54	0	S	310575	Advenella kashmirensis
54	54	S1	1036672	Advenella kashmirensis WT001
33	8	G	507	Alcaligenes
25	25	S	511	Alcaligenes faecalis
6	0	G	305976	Pusillimonas
6	6	S	2028345	Pusillimonas sp. ye3
2	1	G	517	Bordetella
1	1	S	2163011	Bordetella sp. HZ20
1	1	G	222	Achromobacter
6	0	G	149698	Massilia
5	5	S	1678028	Massilia sp. NR 4-1
1	1	S	1141883	Massilia putida
2	0	G	316612	Methylibium
2	0	S	105560	Methylibium petroleiphilum
2	2	S1	420662	Methylibium petroleiphilum PM1
1	0	G	644355	Inhella
1	1	S	392593	Inhella inkyongensis
29	13	G	12960	Azoarcus
13	13	S	198107	Azoarcus sp. CIB
3	3	S	748247	Azoarcus sp. KH32C
4	3	G	73029	Dechloromonas
1	1	S	2231055	Dechloromonas sp. HYN0024
20	0	G	568394	Pseudogulbenkiania
20	20	S	748280	Pseudogulbenkiania sp. NH8B
4	0	G	1054211	Sulfuritalea
4	0	S	748811	Sulfuritalea hydrogenivorans
4	4	S1	1223802	Sulfuritalea hydrogenivorans sk43H
1	1	S	2496847	Sterolibacteriaceae bacterium M52
128	43	G	357	Agrobacterium
85	12	G1	1183400	Agrobacterium tumefaciens complex
73	73	S	358	Agrobacterium tumefaciens
16	0	G	1525371	Neorhizobium
16	16	S	2060726	Neorhizobium sp. SOG26
28	0	G	106591	Ensifer
28	18	S	106592	Ensifer adhaerens
10	10	S1	1416753	Ensifer adhaerens OV14
7	0	G	28105	Sinorhizobium
7	7	S	382	Sinorhizobium meliloti
1	0	G	323620	Shinella
1	1	S	879274	Shinella sp. HZN7
32	13	G	374	Bradyrhizobium
11	11	S	1325090	Bradyrhizobium guangdongense
6	6	S	288000	Bradyrhizobium sp. BTAi1
2	2	S	1274631	Bradyrhizobium icense
23	17	G	85413	Bosea
6	6	S	1867715	Bosea sp. Tri-49
28	28	G	407	Methylobacterium
11	10	G	2282523	Methylorubrum
1	1	S	29429	Methylorubrum zatmanii
36	0	G	449972	Chelativorans
36	36	S	266779	Chelativorans sp. BNC1
4	0	G	31988	Aminobacter
4	4	S	83263	Aminobacter aminovorans
4	4	G	68287	Mesorhizobium
1	0	G	245876	Nitratireductor
1	1	S	1756988	Nitratireductor sp. OM-1
18	15	G	133	Methylocystis
3	3	S	173366	Methylocystis rosea
10	3	G	528	Ochrobactrum
4	4	S	529	Ochrobactrum anthropi
3	3	S	271865	Ochrobactrum sp. A44
7	7	G	28209	Chelatococcus
15	8	G	165697	Sphingopyxis
6	6	S	33050	Sphingopyxis macrogoltabida
1	1	S	1866325	Sphingopyxis sp. MG
9	7	G	165695	Sphingobium
2	2	S	2072936	Sphingobium sp. SCG-1
5	5	G	13687	Sphingomonas
1	0	G	165696	Novosphingobium
1	1	S	2571749	Novosphingobium sp. ABRDHK2
2	0	G	361177	Altererythrobacter
2	2	S	2338327	Altererythrobacter sp. NS1
15	6	G	265	Paracoccus
5	5	S	147645	Paracoccus yeei
4	4	S	2500532	Paracoccus sp. Arc7-R13
4	0	G	309512	Dinoroseobacter
4	0	S	215813	Dinoroseobacter shibae
4	4	S1	398580	Dinoroseobacter shibae DFL 12 = DSM 16493
4	0	G	74030	Roseovarius
4	0	S	391613	Roseovarius sp. TM1035
4	4	S1	2203213	Roseovarius sp. AK1035
3	0	G	1855413	Brevirhabdus
3	3	S	1267768	Brevirhabdus pacifica
2	0	G	1443919	Tabrizicola
2	2	S	2494374	Tabrizicola sp. K13M18
1	0	G	227873	Pannonibacter
1	0	S	121719	Pannonibacter phragmitetus
1	1	S1	1402210	Pannonibacter phragmitetus BB
1	1	G	85	Hyphomonas
1	1	G	41275	Brevundimonas
115	0	G	39643	Sorangium
115	104	S	56	Sorangium cellulosum
11	11	S1	1254432	Sorangium cellulosum So0157-2
1	1	G	32	Myxococcus
1	0	G	40	Stigmatella
1	0	S	41	Stigmatella aurantiaca
1	1	S1	378806	Stigmatella aurantiaca DW4/3-1
2	0	G	162027	Haliangium
2	0	S	80816	Haliangium ochraceum
2	2	S1	502025	Haliangium ochraceum DSM 14365
11	3	G	28231	Geobacter
8	8	S	443143	Geobacter sp. M18
3	0	G	2357	Desulfomonile
3	0	S	2358	Desulfomonile tiedjei
3	3	S1	706587	Desulfomonile tiedjei DSM 6799
4	4	G	119977	Acidithiobacillus
4	0	G	70774	Hydrogenophilus
4	4	S	297	Hydrogenophilus thermoluteolus
16	0	G	501783	Cloacibacterium
16	16	S	237258	Cloacibacterium normanense
11	10	G	59732	Chryseobacterium
1	1	S	2487073	Chryseobacterium sp. H3001
7	3	G	237	Flavobacterium
2	2	S	2547394	Flavobacterium sp. GS13
2	2	S	1306519	Flavobacterium commune
5	0	G	2058174	Antarcticibacterium
5	5	S	2058175	Antarcticibacterium flavum
3	0	G	1016	Capnocytophaga
3	3	S	1705617	Capnocytophaga sp. oral taxon 323
2	0	G	76831	Myroides
1	0	S	256	Myroides odoratus
1	1	S1	929704	Myroides odoratus DSM 2801
1	1	S	76832	Myroides odoratimimus
21	11	G	816	Bacteroides
10	10	S	821	Bacteroides vulgatus
6	6	G	375288	Parabacteroides
3	0	G	307628	Petrimonas
3	3	S	1642646	Petrimonas mucosa
1	0	G	294702	Proteiniphilum
1	1	S	1642647	Proteiniphilum saccharofermentans
15	3	G	28453	Sphingobacterium
10	10	S	743722	Sphingobacterium sp. 21
2	2	S	561061	Sphingobacterium psychroaquaticum
3	0	G	84567	Pedobacter
3	3	S	363852	Pedobacter ginsengisoli
4	0	G	2349	Haliscomenobacter
4	0	S	2350	Haliscomenobacter hydrossis
4	4	S1	760192	Haliscomenobacter hydrossis DSM 1100
1	0	G	398041	Flavisolibacter
1	1	S	1492898	Flavisolibacter tropicus
9	0	G	332162	Candidatus Solibacter
9	0	S	332163	Candidatus Solibacter usitatus
9	9	S1	234267	Candidatus Solibacter usitatus Ellin6076
6	0	G	2004797	Luteitalea
6	6	S	1855912	Luteitalea pratensis
9	8	G	1234	Nitrospira
1	1	S	330214	Nitrospira defluvii
5	0	G	71666	Waddlia
5	0	S	71667	Waddlia chondrophila
5	5	S1	716544	Waddlia chondrophila WSU 86-1044
1	0	G	118	Planctomyces
1	1	S	1636152	Planctomyces sp. SH-PL62
2	0	G	848	Fusobacterium
2	2	S	851	Fusobacterium nucleatum
Tot G=233 Tot S=468
*A rank code, indicating (U)nclassified, (D)omain, (K)ingdom, (P)hylum, (C)lass, (O)rder, (F)amily, (G)enus, or (S)pecies. All other ranks are simply filled with a dash.

## Sheet: F9_virus
Number of reads covered by the clade rooted at this taxon	Number of reads assigned directly to this taxon	Rank code*	NCBI taxonomy ID	Indented scientific name
1	0	S	45617	Human endogenous retrovirus K
1	1	S1	166122	Human endogenous retrovirus K113
1	0	G	1921122	Nonanavirus
1	0	G1	2315205	unclassified Nonanavirus
1	1	S	1969841	Proteus phage VB_PmiS-Isfahan
Tot G=2 Tot S=3
*A rank code, indicating (U)nclassified, (D)omain, (K)ingdom, (P)hylum, (C)lass, (O)rder, (F)amily, (G)enus, or (S)pecies. All other ranks are simply filled with a dash.

## Sheet: F9_femur_virus
Number of reads covered by the clade rooted at this taxon	Number of reads assigned directly to this taxon	Rank code*	NCBI taxonomy ID	Indented scientific name
2	0	S	45617	Human endogenous retrovirus K
2	2	S1	166122	Human endogenous retrovirus K113
1	1	S	279006	Acinetobacter virus 133
Tot G=0 Tot S=3
*A rank code, indicating (U)nclassified, (D)omain, (K)ingdom, (P)hylum, (C)lass, (O)rder, (F)amily, (G)enus, or (S)pecies. All other ranks are simply filled with a dash.

## Sheet: F9_protozoa
Number of reads covered by the clade rooted at this taxon	Number of reads assigned directly to this taxon	Rank code*	NCBI taxonomy ID	Indented scientific name
153	0	G	5810	Toxoplasma
153	0	S	5811	Toxoplasma gondii
153	153	S1	508771	Toxoplasma gondii ME49
1	0	G	5820	Plasmodium
1	0	G1	418103	Plasmodium (Plasmodium)
1	1	S	5855	Plasmodium vivax
2	0	G	5690	Trypanosoma
2	0	G1	39700	Trypanozoon
2	0	S	5691	Trypanosoma brucei
2	0	S1	31285	Trypanosoma brucei gambiense
2	2	S2	679716	Trypanosoma brucei gambiense DAL972
Tot G=5 Tot S=6
*A rank code, indicating (U)nclassified, (D)omain, (K)ingdom, (P)hylum, (C)lass, (O)rder, (F)amily, (G)enus, or (S)pecies. All other ranks are simply filled with a dash.

## Sheet: F9_femur_protozoa
Number of reads covered by the clade rooted at this taxon	Number of reads assigned directly to this taxon	Rank code*	NCBI taxonomy ID	Indented scientific name
560	0	G	5810	Toxoplasma
560	0	S	5811	Toxoplasma gondii
560	560	S1	508771	Toxoplasma gondii ME49
57	1	G	5820	Plasmodium
41	41	S	208452	Plasmodium coatneyi
15	0	G1	418103	Plasmodium (Plasmodium)
15	15	S	5855	Plasmodium vivax
3	0	G	5864	Babesia
3	3	S	5866	Babesia bigemina
Tot G=4 Tot S=5
*A rank code, indicating (U)nclassified, (D)omain, (K)ingdom, (P)hylum, (C)lass, (O)rder, (F)amily, (G)enus, or (S)pecies. All other ranks are simply filled with a dash.
